# Supplementary material for: A community-led calibration of the Zr isotope reference materials: NIST candidate RM 8299 and SRM 3169
Source: Royal Society of Chemistry journal article supplement (doi:10.1039/d3ja00167a), 2023-01-01
Supplement: d3ja00167a1.xlsx [file d3ja00167a1.xlsx]

## Sheet: Summary
Zr iRM calibration: Data and date treatment																																		OPZ: User box
The first 9 lines are for constants and user input on decisions such OPZ corrections, interference corrections, and mass fractionation laws.																																		OPZ	(y=1,n=0)
Anything from line 10 and below is automated calculations. Do not modify.																																		L1	1
																																		L2	1
																																		L3	1




Lab	Date	Seq	Meas.	Sample	OPZ														SAMPLE															OPZ corrected intensities (y=1, n=0)
		#	#		177Hf++	49Ti40Ar	90Zr	91Zr	92Zr	93Nb	94Zr	95Mo	96Zr	97Mo	98Mo	99Ru	100Ru	101Ru	177Hf++	49Ti40Ar	90Zr	91Zr	92Zr	93Nb	94Zr	95Mo	96Zr	97Mo	98Mo	99Ru	100Ru	101Ru		OPZ	177Hf++	49Ti40Ar	90Zr	91Zr	92Zr	93Nb	94Zr	95Mo	96Zr	97Mo	98Mo	99Ru	100Ru	101Ru
Lab 1	Apr 4, 2022	1	Zr_005	iRM			0.000230019	5.67116e-05	7.46287e-05	3.88188e-06	7.26052e-05	-2.58751e-07	9.04657e-05	-6.33691e-06	4.19757e-06						19.5485	4.34439	6.77474	8.18162e-05	7.13637	0.000161649	1.19146	7.22339e-05	0.000188379					1	0	0	19.5483	4.34433	6.77466	7.79344e-05	7.1363	0.000161908	1.19137	7.85708e-05	0.000184181	0	0	0
Lab 1	Apr 4, 2022	1	Zr_010	iRM_1			0.000404119	8.39936e-05	0.000140137	1.40033e-05	0.00011701	9.79323e-06	8.99725e-05	-1.43062e-06	4.7201e-06						18.8222	4.18294	6.52281	7.25719e-05	6.87099	4.58995e-05	1.14702	-8.36316e-08	8.61338e-06					1	0	0	18.8218	4.18285	6.52267	5.85686e-05	6.87087	3.61062e-05	1.14693	1.34698e-06	3.89327e-06	0	0	0
Lab 1	Apr 4, 2022	1	Zr_015	iRM			0.000373278	8.62507e-05	0.00012659	5.07644e-06	0.000100349	-6.28768e-07	8.01066e-05	-9.08734e-06	4.44075e-06						19.0788	4.24002	6.61191	7.74376e-05	6.96488	0.000159565	1.16283	7.48816e-05	0.000183513					1	0	0	19.0785	4.23993	6.61178	7.23612e-05	6.96478	0.000160193	1.16275	8.3969e-05	0.000179073	0	0	0
Lab 1	Apr 4, 2022	1	Zr_020	iRM_2			0.000365938	8.59739e-05	0.000125869	7.55879e-06	0.000105698	-7.18118e-07	8.35107e-05	-7.79167e-06	7.01137e-06						18.8949	4.199	6.5478	7.23619e-05	6.89711	4.53037e-05	1.15137	6.72949e-06	4.892e-06					1	0	0	18.8946	4.19892	6.54767	6.48031e-05	6.897	4.60219e-05	1.15128	1.45212e-05	-2.11937e-06	0	0	0
Lab 1	Apr 4, 2022	1	Zr_025	iRM			0.000403945	9.68061e-05	0.000132312	1.62815e-05	0.000127166	-2.04538e-06	8.11975e-05	-7.54564e-06	4.40556e-06						19.1864	4.26381	6.64898	7.38161e-05	7.00371	0.000160804	1.1693	6.64591e-05	0.000186851					1	0	0	19.186	4.26371	6.64885	5.75346e-05	7.00358	0.000162849	1.16922	7.40047e-05	0.000182445	0	0	0
Lab 1	Apr 4, 2022	1	Zr_030	iRM_10			0.000368898	8.26197e-05	0.000114677	7.51084e-06	0.000102133	-4.39707e-06	8.49722e-05	-1.03077e-05	6.32183e-06						18.9221	4.20501	6.557	7.42462e-05	6.90656	4.57449e-05	1.15291	-2.7107e-06	3.59505e-06					1	0	0	18.9217	4.20493	6.55688	6.67354e-05	6.90646	5.0142e-05	1.15283	7.59703e-06	-2.72678e-06	0	0	0
Lab 1	Apr 4, 2022	1	Zr_035	iRM			0.000409106	8.24025e-05	0.000132159	1.18542e-05	0.000129572	1.31005e-06	9.85742e-05	3.44759e-07	5.15367e-06						19.284	4.28533	6.68235	7.76675e-05	7.03847	0.000160509	1.17498	7.13134e-05	0.000188883					1	0	0	19.2836	4.28525	6.68222	6.58132e-05	7.03835	0.000159199	1.17488	7.09686e-05	0.000183729	0	0	0
Lab 1	Apr 4, 2022	1	Zr_040	iRM_11			0.000398535	8.20155e-05	0.000127227	7.81689e-06	0.000124897	2.38822e-06	9.93334e-05	-1.42906e-05	5.51827e-06						19.0779	4.23956	6.61084	6.66505e-05	6.96324	4.47242e-05	1.16237	3.529e-06	3.6551e-06					1	0	0	19.0775	4.23948	6.61071	5.88336e-05	6.96312	4.2336e-05	1.16227	1.78196e-05	-1.86317e-06	0	0	0
Lab 1	Apr 4, 2022	1	Zr_045	iRM			0.000441241	0.000101056	0.000151722	1.16141e-05	0.000140349	5.20457e-08	9.11351e-05	7.91559e-07	3.95982e-06						19.3968	4.3103	6.72111	7.4178e-05	7.07895	0.000161321	1.18171	7.60981e-05	0.000192566					1	0	0	19.3963	4.3102	6.72095	6.25639e-05	7.07881	0.000161269	1.18162	7.53065e-05	0.000188607	0	0	0
Lab 1	Apr 4, 2022	1	Zr_050	iRM_12			0.000424582	0.000102663	0.000143092	8.7026e-06	0.000130908	1.11862e-05	9.30211e-05	-3.17597e-06	7.75753e-06						19.2318	4.27359	6.66371	7.22209e-05	7.01844	5.80474e-05	1.1715	3.20755e-06	4.84032e-06					1	0	0	19.2313	4.27349	6.66357	6.35183e-05	7.01831	4.68611e-05	1.1714	6.38352e-06	-2.91721e-06	0	0	0
Lab 1	Apr 4, 2022	1	Zr_055	iRM			0.000498155	0.000109743	0.000163204	1.22414e-05	0.000157115	-6.30977e-07	8.67147e-05	-1.74638e-05	5.24739e-06						19.4893	4.33089	6.75309	8.13263e-05	7.11261	0.000159831	1.18733	6.89446e-05	0.000192651					1	0	0	19.4888	4.33078	6.75293	6.90849e-05	7.11245	0.000160462	1.18724	8.64084e-05	0.000187403	0	0	0
Lab 1	Apr 4, 2022	1	Zr_060	iRM_1			0.000432806	9.62345e-05	0.000144539	9.65095e-06	0.000132865	-4.01257e-06	8.27966e-05	-1.53852e-05	7.30241e-06						19.5617	4.34679	6.77763	7.08818e-05	7.13801	4.31948e-05	1.19136	-3.70903e-07	4.40531e-06					1	0	0	19.5613	4.3467	6.77748	6.12309e-05	7.13787	4.72074e-05	1.19128	1.50143e-05	-2.89711e-06	0	0	0
Lab 1	Apr 4, 2022	1	Zr_065	iRM			0.000451155	9.9357e-05	0.000144501	9.9242e-06	0.000144623	-1.37605e-06	9.55734e-05	-8.0225e-06	7.83424e-06						19.5464	4.34346	6.77256	7.62342e-05	7.13277	0.0001609	1.19064	7.27364e-05	0.000191375					1	0	0	19.5459	4.34336	6.77241	6.631e-05	7.13263	0.000162276	1.19054	8.07589e-05	0.000183541	0	0	0
Lab 1	Apr 4, 2022	1	Zr_070	iRM_2			0.000396982	8.99294e-05	0.000135011	1.66956e-05	0.000111259	-3.04755e-06	7.99721e-05	-2.51651e-06	8.14464e-06						19.7381	4.38594	6.83865	7.16463e-05	7.20218	4.28737e-05	1.20204	1.88427e-07	5.8437e-06					1	0	0	19.7377	4.38585	6.83852	5.49507e-05	7.20207	4.59213e-05	1.20196	2.70493e-06	-2.30094e-06	0	0	0
Lab 1	Apr 5, 2022	2	Zr_005	iRM_12			0.000296174	7.58189e-05	9.543e-05	2.20027e-05	8.17163e-05	-2.4697e-06	0.000109465	-1.76051e-06	3.95212e-06						21.6426	4.80627	7.48936	6.83281e-05	7.8778	3.99486e-05	1.31324	-1.03085e-07	3.24812e-06					1	0	0	21.6423	4.8062	7.48926	4.63254e-05	7.87772	4.24183e-05	1.31313	1.65742e-06	-7.04002e-07	0	0	0
Lab 1	Apr 5, 2022	2	Zr_010	iRM_1			0.000364348	8.69353e-05	0.000114868	1.30368e-05	0.000110496	-4.29077e-06	0.000105655	4.83685e-06	1.49975e-06						21.9698	4.87948	7.60444	7.13508e-05	8.00079	4.05382e-05	1.33406	5.96048e-07	3.24144e-06					1	0	0	21.9694	4.87939	7.60432	5.83141e-05	8.00068	4.4829e-05	1.33395	-4.2408e-06	1.7417e-06	0	0	0
Lab 1	Apr 5, 2022	2	Zr_015	iRM_12			0.000400169	9.57527e-05	0.000133744	1.09928e-05	0.000110969	-3.28088e-06	9.98684e-05	-1.45245e-05	2.69991e-06						20.5615	4.56696	7.11787	6.34331e-05	7.48995	3.46149e-05	1.24906	1.36908e-06	1.08644e-06					1	0	0	20.5611	4.56686	7.11774	5.24404e-05	7.48984	3.78958e-05	1.24896	1.58936e-05	-1.61347e-06	0	0	0
Lab 1	Apr 5, 2022	2	Zr_020	iRM_2			0.000378369	9.4239e-05	0.000121936	1.06834e-05	0.000110756	-1.31586e-06	9.88401e-05	-5.90238e-06	4.85904e-06						20.4101	4.53358	7.06614	6.85502e-05	7.43615	3.83656e-05	1.24019	-4.55491e-06	8.98129e-07					1	0	0	20.4097	4.53349	7.06602	5.78668e-05	7.43604	3.96814e-05	1.24009	1.34747e-06	-3.96091e-06	0	0	0
Lab 1	Apr 5, 2022	2	Zr_025	iRM_12			0.000385449	8.81257e-05	0.000118168	1.1764e-05	0.000113588	-7.77894e-06	9.14549e-05	-1.09618e-05	1.82692e-06						20.0837	4.46111	6.95343	6.25446e-05	7.31788	3.4645e-05	1.22051	-6.18534e-06	-6.7307e-07					1	0	0	20.0833	4.46103	6.95331	5.07806e-05	7.31777	4.24239e-05	1.22042	4.77651e-06	-2.49999e-06	0	0	0
Lab 1	Apr 5, 2022	2	Zr_030	iRM_10			0.000383353	9.2361e-05	0.000120899	3.59673e-06	0.000102926	-2.76717e-06	8.0788e-05	-1.28781e-05	-7.58787e-07						20.9873	4.66215	7.2671	6.69032e-05	7.64888	3.75221e-05	1.27586	-1.20233e-06	2.38824e-07					1	0	0	20.9869	4.66206	7.26698	6.33065e-05	7.64878	4.02893e-05	1.27578	1.16758e-05	9.97611e-07	0	0	0
Lab 1	Apr 5, 2022	2	Zr_035	iRM_12			0.000373	8.18309e-05	0.00011762	1.69209e-05	0.000104405	-1.73994e-07	9.79047e-05	-5.97128e-06	2.69844e-06						19.91	4.42279	6.89407	6.18235e-05	7.25616	3.4157e-05	1.21033	1.83494e-07	-1.97258e-06					1	0	0	19.9096	4.42271	6.89395	4.49026e-05	7.25606	3.4331e-05	1.21024	6.15477e-06	-4.67102e-06	0	0	0
Lab 1	Apr 5, 2022	2	Zr_040	iRM_11			0.000383437	9.87065e-05	0.000122139	1.57413e-05	0.000115606	-2.26569e-06	7.81969e-05	-4.91262e-06	-9.45791e-07						20.6252	4.58185	7.14221	6.46674e-05	7.5179	3.54537e-05	1.25408	7.42338e-07	3.07349e-07					1	0	0	20.6248	4.58175	7.14209	4.89261e-05	7.51778	3.77194e-05	1.254	5.65496e-06	1.25314e-06	0	0	0
Lab 1	Apr 5, 2022	2	Zr_045	iRM_12			0.00038169	8.14114e-05	0.000127339	9.53699e-06	0.000104582	-4.13727e-06	8.33045e-05	-1.2701e-05	-2.69048e-07						19.5922	4.35227	6.78427	5.94077e-05	7.14085	3.42336e-05	1.19115	-2.12393e-06	-1.34613e-06					1	0	0	19.5918	4.35219	6.78415	4.98707e-05	7.14075	3.83708e-05	1.19107	1.0577e-05	-1.07708e-06	0	0	0
Lab 1	Apr 5, 2022	2	Zr_050	iRM			0.000380134	8.82864e-05	0.000123683	9.7229e-06	0.000109559	2.10932e-06	7.58625e-05	-1.64291e-05	1.98052e-06						19.6281	4.36036	6.79697	5.78113e-05	7.15462	3.50366e-05	1.19351	-4.05068e-06	8.15892e-07					1	0	0	19.6277	4.36027	6.79684	4.80884e-05	7.15451	3.29273e-05	1.19344	1.23785e-05	-1.16463e-06	0	0	0
Lab 1	Apr 5, 2022	2	Zr_055	iRM_12			0.000373656	8.42715e-05	0.000119375	1.15089e-05	9.93641e-05	-1.05639e-06	8.91654e-05	-7.01811e-06	8.38453e-07						19.5147	4.33526	6.75791	5.79861e-05	7.11356	3.2945e-05	1.18669	2.41798e-06	-9.8162e-08					1	0	0	19.5143	4.33518	6.75779	4.64772e-05	7.11347	3.40014e-05	1.1866	9.4361e-06	-9.36615e-07	0	0	0
Lab 1	Apr 5, 2022	2	Zr_060	iRM_1			0.000368793	9.5254e-05	0.00012018	1.95532e-05	0.000105213	-2.61011e-06	7.77603e-05	-1.9374e-05	-7.33772e-07						20.4643	4.54625	7.08708	6.3669e-05	7.46039	3.56277e-05	1.2446	-6.47926e-06	-5.28212e-07					1	0	0	20.4639	4.54615	7.08696	4.41157e-05	7.46028	3.82378e-05	1.24452	1.28947e-05	2.05561e-07	0	0	0
Lab 1	Apr 5, 2022	2	Zr_065	iRM_12			0.00037768	8.08428e-05	0.000121659	1.51558e-05	0.000103123	-7.95004e-07	7.63946e-05	-7.55192e-06	2.67445e-06						19.6127	4.35707	6.79206	6.14841e-05	7.14983	3.26031e-05	1.19277	2.51907e-06	1.52841e-06					1	0	0	19.6124	4.35699	6.79194	4.63283e-05	7.14973	3.33981e-05	1.19269	1.0071e-05	-1.14605e-06	0	0	0
Lab 1	Apr 5, 2022	2	Zr_070	iRM_2			0.000414123	8.76883e-05	0.000129782	1.94183e-05	0.000125745	8.81492e-07	8.78146e-05	-1.63897e-05	-4.74322e-07						19.7206	4.38107	6.82957	6.4313e-05	7.18945	3.47132e-05	1.19938	-8.54492e-06	1.1465e-07					1	0	0	19.7202	4.38098	6.82944	4.48947e-05	7.18933	3.38317e-05	1.19929	7.84478e-06	5.88972e-07	0	0	0
Lab 1	Apr 5, 2022	2	Zr_075	iRM_12			0.000406418	8.32893e-05	0.000134383	1.21963e-05	0.000115118	-1.76304e-06	8.32539e-05	-9.17839e-07	3.02793e-06						19.3774	4.30484	6.71064	6.20046e-05	7.06412	3.16348e-05	1.17849	-3.8383e-06	6.07607e-08					1	0	0	19.377	4.30476	6.7105	4.98083e-05	7.06401	3.33979e-05	1.17841	-2.92046e-06	-2.96717e-06	0	0	0
Lab 1	Apr 5, 2022	2	Zr_080	iRM_10			0.000420644	0.000101098	0.000143537	1.39954e-06	0.000120943	-4.19826e-06	8.41473e-05	-1.12195e-05	9.12718e-07						20.3468	4.52026	7.04667	6.00896e-05	7.4182	3.36246e-05	1.23761	-4.85631e-06	-3.45656e-07					1	0	0	20.3464	4.52016	7.04653	5.86901e-05	7.41808	3.78228e-05	1.23752	6.36315e-06	-1.25837e-06	0	0	0
Lab 1	Apr 5, 2022	2	Zr_085	iRM_12			0.000397009	7.72536e-05	0.000128099	8.48329e-06	0.000112403	-3.90552e-06	7.53485e-05	-2.28526e-05	3.50856e-06						19.4159	4.31342	6.72411	5.63143e-05	7.07846	3.10964e-05	1.1809	-8.67969e-06	-4.52704e-07					1	0	0	19.4155	4.31334	6.72398	4.7831e-05	7.07835	3.50019e-05	1.18083	1.41729e-05	-3.96126e-06	0	0	0
Lab 1	Apr 5, 2022	2	Zr_090	iRM_11			0.000376771	7.79826e-05	0.000122336	1.08275e-05	0.000108248	-8.11337e-08	6.91917e-05	-7.97456e-06	-4.46181e-07						20.358	4.5228	7.05063	6.21263e-05	7.42249	3.34474e-05	1.23834	2.13072e-06	-1.30792e-06					1	0	0	20.3576	4.52272	7.05051	5.12988e-05	7.42238	3.35285e-05	1.23827	1.01053e-05	-8.61741e-07	0	0	0
Lab 1	Apr 5, 2022	2	Zr_095	iRM_12			0.000400815	9.22735e-05	0.000127118	3.57269e-06	0.00012687	-2.95056e-06	9.18076e-05	-2.24358e-06	-2.41744e-06						19.4696	4.32541	6.74281	5.63745e-05	7.09825	3.22781e-05	1.18422	-1.20469e-06	-1.28791e-06					1	0	0	19.4692	4.32532	6.74268	5.28018e-05	7.09812	3.52286e-05	1.18413	1.03889e-06	1.12952e-06	0	0	0
Lab 1	Apr 5, 2022	2	Zr_100	iRM			0.000377603	8.12357e-05	0.000115145	1.39943e-05	0.000121957	-4.82887e-06	8.53518e-05	1.20239e-06	1.04164e-06						19.2758	4.28236	6.67577	5.54082e-05	7.02788	3.05305e-05	1.17251	-1.93878e-07	-3.20612e-07					1	0	0	19.2754	4.28228	6.67566	4.14139e-05	7.02776	3.53594e-05	1.17242	-1.39627e-06	-1.36225e-06	0	0	0
Lab 1	Apr 5, 2022	2	Zr_105	iRM_12			0.00043773	0.000106666	0.000146809	9.14969e-06	0.000140917	1.61663e-07	7.90725e-05	-6.5859e-06	2.47416e-06						19.406	4.31126	6.72086	5.83218e-05	7.07526	3.2364e-05	1.18042	1.53714e-06	3.5583e-07					1	0	0	19.4055	4.31115	6.72071	4.91721e-05	7.07511	3.22023e-05	1.18034	8.12304e-06	-2.11833e-06	0	0	0
Lab 1	Apr 5, 2022	3	Zr_005	iRM_12			0.000290791	6.55212e-05	9.62402e-05	2.59497e-05	8.27579e-05	-3.20773e-06	8.11407e-05	-1.37365e-06	2.70127e-06						19.5117	4.33474	6.75739	5.58235e-05	7.11361	3.20477e-05	1.18678	7.553e-06	-1.1689e-06					1	0	0	19.5114	4.33468	6.75729	2.98738e-05	7.11353	3.52555e-05	1.1867	8.92666e-06	-3.87017e-06	0	0	0
Lab 1	Apr 5, 2022	3	Zr_010	iRM_1			0.000367616	8.2453e-05	0.000111754	4.75229e-06	0.000109676	-1.75695e-06	8.4518e-05	-2.74457e-06	1.88753e-06						20.4207	4.53678	7.07262	6.42134e-05	7.44591	3.27312e-05	1.24229	-2.95463e-06	-2.7191e-07					1	0	0	20.4203	4.53669	7.07251	5.94611e-05	7.4458	3.44881e-05	1.24221	-2.10066e-07	-2.15944e-06	0	0	0
Lab 1	Apr 5, 2022	3	Zr_015	iRM_12			0.000379409	8.58965e-05	0.000122987	1.67498e-05	0.000116327	-2.62388e-06	8.19507e-05	-1.08177e-05	-2.26939e-06						19.5461	4.34246	6.76954	5.86847e-05	7.12653	3.68059e-05	1.18899	-5.61994e-06	-1.10371e-06					1	0	0	19.5457	4.34237	6.76942	4.1935e-05	7.12642	3.94298e-05	1.18891	5.19775e-06	1.16569e-06	0	0	0
Lab 1	Apr 5, 2022	3	Zr_020	iRM_2			0.000373164	8.61614e-05	0.000111934	1.74461e-05	0.000105479	3.83909e-07	0.000102779	-4.78044e-06	2.00063e-06						19.9063	4.42251	6.89434	6.63745e-05	7.25818	2.9557e-05	1.21095	-1.03608e-06	1.35547e-06					1	0	0	19.9059	4.42243	6.89423	4.89283e-05	7.25807	2.91731e-05	1.21085	3.74436e-06	-6.45155e-07	0	0	0
Lab 1	Apr 5, 2022	3	Zr_025	iRM_12			0.000395031	9.60873e-05	0.000127984	1.81907e-05	0.000111562	-8.19765e-07	9.0893e-05	-9.40249e-06	2.21189e-06						19.5851	4.35106	6.783	5.85441e-05	7.14076	3.20626e-05	1.19134	-1.49739e-06	-1.33914e-07					1	0	0	19.5847	4.35097	6.78287	4.03534e-05	7.14065	3.28824e-05	1.19125	7.9051e-06	-2.34581e-06	0	0	0
Lab 1	Apr 5, 2022	3	Zr_030	iRM_10			0.00042288	9.22998e-05	0.000133721	2.18016e-05	0.000127304	-1.25984e-06	7.67951e-05	-1.18165e-05	3.58092e-06						20.5426	4.56391	7.11496	6.50677e-05	7.49068	3.37058e-05	1.24979	1.25703e-06	1.35925e-06					1	0	0	20.5422	4.56382	7.11482	4.32661e-05	7.49055	3.49657e-05	1.24971	1.30736e-05	-2.22167e-06	0	0	0
Lab 1	Apr 5, 2022	3	Zr_035	iRM_12			0.000378831	7.64588e-05	0.000110888	2.07269e-05	0.000107934	-2.16351e-06	0.000129021	-1.44766e-05	3.56296e-06						19.5254	4.33785	6.76237	6.14871e-05	7.11913	2.97693e-05	1.18779	-2.55948e-06	-2.55237e-08					1	0	0	19.525	4.33777	6.76226	4.07602e-05	7.11903	3.19328e-05	1.18767	1.19171e-05	-3.58848e-06	0	0	0
Lab 1	Apr 5, 2022	3	Zr_040	iRM_11			0.000394838	8.60215e-05	0.000120966	1.60594e-05	0.000112906	1.09305e-05	7.9204e-05	-8.90385e-06	9.76525e-07						20.5835	4.57297	7.12903	6.48593e-05	7.50539	4.40941e-05	1.25222	1.01157e-07	-2.20884e-07					1	0	0	20.5831	4.57288	7.12891	4.87998e-05	7.50527	3.31636e-05	1.25214	9.005e-06	-1.19741e-06	0	0	0
Lab 1	Apr 5, 2022	3	Zr_045	iRM_12			0.000374431	8.69501e-05	0.000122286	1.25537e-05	0.000106321	9.9738e-06	6.89019e-05	-9.7356e-06	3.77398e-06						19.6325	4.36164	6.79949	6.11054e-05	7.15823	4.19677e-05	1.19428	-7.37338e-06	-9.67161e-07					1	0	0	19.6321	4.36155	6.79937	4.85517e-05	7.15813	3.19938e-05	1.19421	2.36221e-06	-4.74114e-06	0	0	0
Lab 1	Apr 5, 2022	3	Zr_050	iRM			0.000439848	9.21588e-05	0.000135005	3.39256e-06	0.000131344	-2.54363e-06	8.53877e-05	-5.57216e-06	2.45457e-06						19.4031	4.3107	6.72001	5.78285e-05	7.07462	2.95541e-05	1.18032	-1.21506e-05	2.87275e-08					1	0	0	19.4026	4.3106	6.71988	5.4436e-05	7.07449	3.20978e-05	1.18024	-6.57848e-06	-2.42584e-06	0	0	0
Lab 1	Apr 5, 2022	3	Zr_055	iRM_12			0.000379687	8.73192e-05	0.000118153	8.89156e-06	9.72748e-05	-5.20854e-06	7.72822e-05	-1.12049e-05	-1.18947e-06						19.6326	4.36166	6.79949	5.44185e-05	7.1582	2.94432e-05	1.19423	-5.31269e-06	-6.80579e-07					1	0	0	19.6322	4.36157	6.79937	4.55269e-05	7.15811	3.46518e-05	1.19416	5.89217e-06	5.08892e-07	0	0	0
Lab 1	Apr 5, 2022	3	Zr_060	iRM_1			0.000377838	8.78995e-05	0.000119714	9.42878e-06	0.000117982	-3.88579e-07	6.80143e-05	-3.94019e-08	6.76443e-07						20.7865	4.61809	7.1994	6.71207e-05	7.57953	3.23109e-05	1.26459	-2.24887e-06	1.53134e-06					1	0	0	20.7861	4.618	7.19928	5.76919e-05	7.57941	3.26995e-05	1.26453	-2.20947e-06	8.54899e-07	0	0	0
Lab 1	Apr 5, 2022	3	Zr_065	iRM_12			0.00039515	9.27092e-05	0.000124755	1.37962e-05	0.00011762	-9.18858e-07	6.99479e-05	-1.04069e-06	2.84e-06						19.6944	4.37536	6.82076	5.69432e-05	7.18035	2.89532e-05	1.1979	-1.50507e-06	2.19722e-07					1	0	0	19.694	4.37526	6.82063	4.3147e-05	7.18024	2.9872e-05	1.19783	-4.64385e-07	-2.62028e-06	0	0	0
Lab 1	Apr 5, 2022	3	Zr_070	iRM_2			0.000388407	8.32834e-05	0.000118371	1.75213e-05	0.00011791	-4.59798e-06	8.45598e-05	-4.10269e-06	3.13867e-06						20.3093	4.51204	7.03399	6.30268e-05	7.40513	3.02588e-05	1.23545	1.06734e-06	-1.04764e-06					1	0	0	20.3089	4.51196	7.03387	4.55055e-05	7.40501	3.48568e-05	1.23536	5.17003e-06	-4.18631e-06	0	0	0
Lab 1	Apr 5, 2022	3	Zr_075	iRM_12			0.000381177	7.367e-05	0.000122501	1.24124e-05	9.7637e-05	-6.01946e-07	8.5594e-05	-8.43634e-06	3.34191e-06						19.5831	4.35063	6.78225	5.42891e-05	7.13994	2.85973e-05	1.1912	-6.88797e-06	-2.46178e-07					1	0	0	19.5827	4.35055	6.78213	4.18767e-05	7.13984	2.91993e-05	1.19112	1.54837e-06	-3.58809e-06	0	0	0
Lab 1	Apr 5, 2022	3	Zr_080	iRM_10			0.000473042	9.7038e-05	0.000146469	1.22653e-05	0.000132429	9.73471e-07	9.08513e-05	-9.64814e-06	-2.22402e-06						20.873	4.63723	7.22916	5.83903e-05	7.61062	3.08657e-05	1.26973	2.30646e-07	2.56281e-07					1	0	0	20.8725	4.63714	7.22902	4.61249e-05	7.61049	2.98922e-05	1.26964	9.87878e-06	2.4803e-06	0	0	0
Lab 1	Apr 5, 2022	3	Zr_085	iRM_12			0.000412183	9.10009e-05	0.000140269	9.54883e-06	0.00011193	-4.71765e-06	7.73659e-05	-1.87231e-05	-1.57966e-06						19.7826	4.39496	6.85148	5.41646e-05	7.21285	3.042e-05	1.20336	-5.43818e-06	2.91335e-07					1	0	0	19.7822	4.39487	6.85134	4.46158e-05	7.21274	3.51377e-05	1.20328	1.3285e-05	1.871e-06	0	0	0
Lab 1	Apr 5, 2022	3	Zr_090	iRM_11			0.000394101	6.92357e-05	0.000122472	1.06025e-05	0.000100511	-3.09701e-06	8.349e-05	-6.62527e-06	5.06141e-06						20.8592	4.63424	7.22464	6.18564e-05	7.60604	2.99846e-05	1.26904	-9.03056e-07	-1.70684e-07					1	0	0	20.8588	4.63417	7.22452	5.12539e-05	7.60594	3.30817e-05	1.26895	5.72221e-06	-5.2321e-06	0	0	0
Lab 1	Apr 5, 2022	3	Zr_095	iRM_12			0.000472946	9.93508e-05	0.000141098	1.67317e-05	0.000141801	-1.91869e-06	8.36811e-05	-5.35037e-06	4.98012e-07						19.7961	4.39796	6.85615	5.76502e-05	7.21782	2.89998e-05	1.20418	-7.38636e-06	-1.68426e-08					1	0	0	19.7957	4.39786	6.856	4.09184e-05	7.21768	3.09185e-05	1.2041	-2.036e-06	-5.14854e-07	0	0	0
Lab 1	Apr 5, 2022	3	Zr_100	iRM			0.000451184	9.63288e-05	0.000139392	1.55702e-05	0.000136822	2.89279e-06	7.60688e-05	-1.38106e-05	5.65803e-06						19.6986	4.3764	6.82257	5.84774e-05	7.18273	2.61829e-05	1.19837	-9.09772e-06	1.84792e-06					1	0	0	19.6982	4.3763	6.82244	4.29072e-05	7.1826	2.32901e-05	1.19829	4.71285e-06	-3.81011e-06	0	0	0
Lab 1	Apr 5, 2022	3	Zr_105	iRM_12			0.000583568	0.0001323	0.000190738	1.25295e-05	0.00017566	-1.45052e-06	8.73844e-05	-1.01906e-05	3.11102e-06						19.6544	4.36649	6.80703	5.47808e-05	7.16609	2.81911e-05	1.19556	-8.68553e-06	-4.46783e-07					1	0	0	19.6538	4.36636	6.80684	4.22514e-05	7.16592	2.96416e-05	1.19548	1.5051e-06	-3.55781e-06	0	0	0
Lab 1	Apr 5, 2022	3	Zr_110	iRM_1			0.000418664	9.99614e-05	0.00014102	9.23062e-06	0.000133257	-1.54807e-06	7.99421e-05	-5.86351e-06	-5.00691e-07						21.2575	4.72281	7.36278	6.31209e-05	7.75164	3.06413e-05	1.29336	-2.22471e-07	-3.01419e-07					1	0	0	21.2571	4.72271	7.36263	5.38903e-05	7.75151	3.21894e-05	1.29328	5.64104e-06	1.99271e-07	0	0	0
Lab 1	Apr 5, 2022	3	Zr_115	iRM_12			0.00039817	8.59412e-05	0.000118763	1.24935e-05	0.000117162	-2.62944e-06	7.73061e-05	-9.25524e-06	3.27487e-06						19.7264	4.38249	6.83208	5.18466e-05	7.19266	2.62026e-05	1.20003	2.88302e-07	-1.00673e-06					1	0	0	19.726	4.3824	6.83196	3.93531e-05	7.19254	2.88321e-05	1.19995	9.54354e-06	-4.28159e-06	0	0	0
Lab 1	Apr 5, 2022	3	Zr_120	iRM_2			0.000400406	0.000100534	0.00013813	9.77095e-06	0.000116318	-3.77902e-06	7.8911e-05	-4.33982e-06	7.73108e-07						20.5469	4.56485	7.11635	5.79261e-05	7.49193	2.66506e-05	1.24996	8.07206e-08	1.45548e-07					1	0	0	20.5465	4.56475	7.11621	4.81551e-05	7.49181	3.04296e-05	1.24989	4.42054e-06	-6.27559e-07	0	0	0
Lab 1	Apr 5, 2022	3	Zr_125	iRM_12			0.000452255	9.33522e-05	0.000137229	7.79589e-06	0.000132326	-5.36883e-08	8.20462e-05	-1.13215e-05	-4.73259e-07						19.7827	4.39504	6.85171	6.16701e-05	7.21333	2.74561e-05	1.2035	-5.0347e-06	1.40154e-06					1	0	0	19.7822	4.39494	6.85158	5.38742e-05	7.21319	2.75098e-05	1.20342	6.2868e-06	1.8748e-06	0	0	0
Lab 1	Apr 5, 2022	3	Zr_130	iRM_10			0.00699361	0.00156871	0.00241175	2.25789e-05	0.00252156	-2.87671e-06	0.000522204	-1.1516e-05	2.30514e-06						21.0276	4.67174	7.2832	6.41923e-05	7.66795	2.85362e-05	1.27939	-3.03567e-06	-6.84787e-07					1	0	0	21.0207	4.67017	7.28078	4.16134e-05	7.66543	3.14129e-05	1.27887	8.48031e-06	-2.98993e-06	0	0	0
Lab 1	Apr 5, 2022	3	Zr_135	iRM_12			0.000411989	8.61614e-05	0.000141109	1.48017e-05	0.00012821	4.02819e-07	8.38664e-05	-1.2971e-05	-1.09651e-06						20.0121	4.44605	6.93113	5.94512e-05	7.29695	2.82553e-05	1.21743	-8.45378e-07	-1.13383e-06					1	0	0	20.0117	4.44596	6.93099	4.46496e-05	7.29682	2.78525e-05	1.21735	1.21256e-05	-3.73163e-08	0	0	0
Lab 1	Apr 5, 2022	3	Zr_140	iRM_11			0.000409768	8.97269e-05	0.000134227	1.8977e-05	0.000120251	-2.02111e-06	7.74526e-05	6.90348e-06	-2.45817e-06						21.1169	4.69161	7.31422	5.63328e-05	7.70076	2.92962e-05	1.28488	3.11509e-06	-2.13325e-06					1	0	0	21.1165	4.69152	7.31409	3.73558e-05	7.70064	3.13173e-05	1.28481	-3.78839e-06	3.24916e-07	0	0	0
Lab 1	Apr 5, 2022	3	Zr_145	iRM_12			0.000414762	9.74089e-05	0.000141356	9.6239e-06	0.000119955	-2.84713e-06	7.58356e-05	-8.13936e-06	-9.99933e-07						19.8255	4.40455	6.86654	5.01342e-05	7.22897	2.61795e-05	1.2061	-3.90844e-06	-4.05239e-07					1	0	0	19.8251	4.40446	6.8664	4.05103e-05	7.22885	2.90266e-05	1.20602	4.23091e-06	5.94694e-07	0	0	0
Lab 1	Apr 5, 2022	3	Zr_150	iRM			0.00041003	9.11586e-05	0.000127557	2.12612e-05	0.000109499	1.50514e-06	7.32236e-05	-3.23935e-06	1.61869e-06						19.9881	4.44081	6.92321	5.99347e-05	7.28905	2.84681e-05	1.21615	-2.49706e-06	4.21437e-07					1	0	0	19.9877	4.44072	6.92308	3.86736e-05	7.28894	2.6963e-05	1.21608	7.42283e-07	-1.19725e-06	0	0	0
Lab 1	Apr 5, 2022	3	Zr_155	iRM_12			0.00041271	8.8218e-05	0.000127854	1.43545e-05	0.000119976	1.24005e-06	7.29456e-05	-2.43845e-06	6.20827e-06						19.7554	4.38908	6.84256	5.82039e-05	7.20407	2.65039e-05	1.20199	2.37079e-06	4.27659e-07					1	0	0	19.755	4.38899	6.84243	4.38494e-05	7.20395	2.52639e-05	1.20192	4.80924e-06	-5.78061e-06	0	0	0
Lab 1	Apr 5, 2022	3	Zr_160	iRM_1			0.000414052	8.60991e-05	0.000141003	1.48379e-05	0.0001217	-3.33232e-06	7.29216e-05	4.54027e-06	5.62899e-06						21.5628	4.79071	7.46889	6.33404e-05	7.86383	2.91479e-05	1.31214	1.08429e-06	-1.01185e-06					1	0	0	21.5624	4.79063	7.46875	4.85024e-05	7.8637	3.24803e-05	1.31207	-3.45598e-06	-6.64083e-06	0	0	0
Lab 1	Apr 5, 2022	3	Zr_165	iRM_12			0.000478889	0.000104231	0.000145708	1.30998e-05	0.000141519	-5.67677e-07	7.95357e-05	-5.58143e-06	9.80917e-07						19.9746	4.43788	6.91873	5.85061e-05	7.28448	2.68409e-05	1.21546	1.68395e-06	-1.29743e-06					1	0	0	19.9742	4.43778	6.91859	4.54063e-05	7.28433	2.74085e-05	1.21538	7.26538e-06	-2.27835e-06	0	0	0
Lab 1	Apr 5, 2022	3	Zr_170	iRM_2			0.000484285	0.000105353	0.00016393	1.16861e-05	0.000149205	7.09571e-07	8.76442e-05	-4.41148e-06	1.68656e-06						20.8194	4.62554	7.21129	6.2449e-05	7.5925	2.7628e-05	1.26684	2.93629e-07	-1.80932e-07					1	0	0	20.8189	4.62543	7.21113	5.07629e-05	7.59235	2.69184e-05	1.26675	4.70511e-06	-1.86749e-06	0	0	0
Lab 1	Apr 5, 2022	3	Zr_175	iRM_12			0.000473471	0.000103235	0.00016116	1.56842e-05	0.000150921	-2.06424e-06	8.17563e-05	-1.54601e-05	-3.1888e-08						20.1703	4.48126	6.98635	5.74668e-05	7.35553	2.60861e-05	1.22727	-3.99431e-06	1.95786e-06					1	0	0	20.1698	4.48116	6.98618	4.17827e-05	7.35538	2.81503e-05	1.22719	1.14658e-05	1.98975e-06	0	0	0
Lab 1	Apr 5, 2022	3	Zr_180	iRM_10			0.000555666	0.000137754	0.00018043	1.05336e-05	0.00017239	-1.23622e-06	8.99396e-05	-1.0862e-05	1.86099e-06						21.4153	4.75811	7.4182	6.10199e-05	7.81083	2.96313e-05	1.30334	-1.02329e-06	5.823e-07					1	0	0	21.4148	4.75797	7.41802	5.04863e-05	7.81065	3.08675e-05	1.30325	9.83869e-06	-1.27869e-06	0	0	0
Lab 1	Apr 5, 2022	3	Zr_185	iRM_12			0.00047029	9.99058e-05	0.000151279	1.19562e-05	0.000135469	-4.55025e-06	7.09371e-05	-8.10355e-06	4.23484e-06						19.9091	4.42327	6.89596	5.45418e-05	7.26043	2.46851e-05	1.21142	-1.69357e-06	1.91875e-07					1	0	0	19.9086	4.42317	6.89581	4.25856e-05	7.26029	2.92353e-05	1.21135	6.40998e-06	-4.04297e-06	0	0	0
Lab 1	Apr 5, 2022	3	Zr_190	iRM_11			0.000474398	0.000105365	0.000150363	1.01582e-05	0.000131928	-1.40017e-06	7.28768e-05	-6.89198e-06	2.20156e-06						21.5922	4.79743	7.47954	6.40041e-05	7.87556	2.9511e-05	1.31415	-4.95718e-07	9.08621e-07					1	0	0	21.5917	4.79733	7.47939	5.38459e-05	7.87543	3.09112e-05	1.31408	6.39626e-06	-1.29294e-06	0	0	0
Lab 1	Apr 5, 2022	3	Zr_195	iRM_12			0.000468495	0.000121068	0.000143731	1.88389e-05	0.00013951	9.80135e-07	8.20462e-05	-1.41082e-05	3.84118e-06						19.9197	4.42571	6.89979	5.69257e-05	7.2648	2.81149e-05	1.21218	-5.39066e-06	5.15926e-07					1	0	0	19.9192	4.42558	6.89965	3.80868e-05	7.26466	2.71347e-05	1.2121	8.71757e-06	-3.32525e-06	0	0	0
Lab 1	Apr 5, 2022	3	Zr_200	iRM			0.000478537	0.000113248	0.000152095	1.62696e-05	0.000157611	-7.78564e-08	7.0952e-05	-7.98665e-06	1.76769e-06						20.1775	4.48295	6.9891	5.73977e-05	7.35871	2.79322e-05	1.22785	-1.25987e-06	2.20158e-06					1	0	0	20.177	4.48284	6.98895	4.11281e-05	7.35856	2.80101e-05	1.22778	6.72679e-06	4.33891e-07	0	0	0
Lab 1	Apr 5, 2022	3	Zr_205	iRM_12			0.000482496	0.000107901	0.000154098	2.12164e-05	0.000146353	1.19872e-05	8.51785e-05	-1.76037e-06	4.46192e-06						20.0613	4.45727	6.94909	5.38968e-05	7.3168	3.68708e-05	1.22089	1.75969e-06	-2.8194e-07					1	0	0	20.0608	4.45716	6.94893	3.26805e-05	7.31665	2.48835e-05	1.22081	3.52006e-06	-4.74386e-06	0	0	0
Lab 1	Apr 5, 2022	3	Zr_210	iRM_1			0.0004756	0.000108394	0.000154756	1.01432e-05	0.000151142	-5.79277e-06	7.69744e-05	-8.57734e-06	2.58855e-06						21.6884	4.81878	7.51282	6.19714e-05	7.91054	3.03262e-05	1.32	-5.10213e-06	8.79219e-07					1	0	0	21.6879	4.81868	7.51266	5.18281e-05	7.91039	3.6119e-05	1.31993	3.47521e-06	-1.70933e-06	0	0	0
Lab 1	Apr 5, 2022	3	Zr_215	iRM_12			0.000488907	0.000110337	0.000146486	1.07165e-05	0.000144892	-2.92864e-06	7.42038e-05	-1.15792e-05	1.70477e-06						20.2288	4.49441	7.00694	5.73569e-05	7.37757	2.59291e-05	1.23102	-5.40201e-06	4.30777e-07					1	0	0	20.2283	4.4943	7.00679	4.66403e-05	7.37742	2.88577e-05	1.23094	6.17722e-06	-1.27399e-06	0	0	0
Lab 1	Apr 5, 2022	3	Zr_220	iRM_2			0.00879649	0.00195488	0.00304333	1.30488e-05	0.00318466	-4.33919e-06	0.000586476	-3.00808e-06	1.87188e-06						21.0687	4.68108	7.2982	5.9422e-05	7.68469	2.71662e-05	1.28231	-3.25119e-07	-4.26795e-07					1	0	0	21.0599	4.67913	7.29516	4.63733e-05	7.6815	3.15054e-05	1.28173	2.68296e-06	-2.29867e-06	0	0	0
Lab 1	Apr 5, 2022	3	Zr_225	iRM_12			0.000464091	0.000106814	0.000142865	1.8752e-05	0.000144617	-6.37243e-07	7.69894e-05	-5.39222e-06	2.7367e-06						19.9838	4.44004	6.92222	5.9652e-05	7.28853	2.45187e-05	1.21617	3.22775e-06	-2.74084e-08					1	0	0	19.9834	4.43993	6.92208	4.09001e-05	7.28838	2.5156e-05	1.2161	8.61998e-06	-2.76411e-06	0	0	0
Lab 1	Apr 5, 2022	3	Zr_230	iRM_10			0.000489605	0.000112018	0.00016228	7.43275e-06	0.000156279	-6.02622e-07	8.97273e-05	-8.91606e-06	6.493e-07						21.6993	4.82135	7.517	6.40169e-05	7.91546	2.91216e-05	1.32087	8.31811e-06	-1.55477e-07					1	0	0	21.6988	4.82124	7.51684	5.65841e-05	7.91531	2.97242e-05	1.32078	1.72342e-05	-8.04777e-07	0	0	0
Lab 1	Apr 5, 2022	3	Zr_235	iRM_12			0.000463555	0.000113921	0.000149005	1.18721e-05	0.000148918	-1.30063e-06	8.08717e-05	-7.50644e-06	3.39227e-06						20.1059	4.46711	6.96447	5.70994e-05	7.33289	2.5062e-05	1.22356	4.27682e-06	7.88941e-07					1	0	0	20.1054	4.467	6.96432	4.52272e-05	7.33274	2.63626e-05	1.22348	1.17833e-05	-2.60333e-06	0	0	0
Lab 1	Apr 5, 2022	3	Zr_240	iRM_11			0.000485084	0.000110222	0.000150056	7.73283e-06	0.000149553	-1.52287e-06	8.34929e-05	2.24604e-06	8.0786e-07						21.7954	4.84257	7.54999	5.56627e-05	7.94975	2.70679e-05	1.32656	-4.92062e-07	-8.3491e-07					1	0	0	21.795	4.84246	7.54984	4.79299e-05	7.94961	2.85908e-05	1.32647	-2.7381e-06	-1.64277e-06	0	0	0
Lab 1	Apr 5, 2022	3	Zr_245	iRM_12			0.000565733	0.000122021	0.000185668	1.54621e-05	0.000180087	6.32645e-07	8.67925e-05	-9.91489e-06	2.94048e-07						20.3189	4.5145	7.03847	5.53104e-05	7.41112	2.56056e-05	1.23667	9.2766e-07	-8.694e-07					1	0	0	20.3184	4.51437	7.03829	3.98484e-05	7.41094	2.49729e-05	1.23658	1.08425e-05	-1.16345e-06	0	0	0
Lab 1	Apr 5, 2022	3	Zr_250	iRM			0.000487159	0.000102823	0.000160312	1.97153e-05	0.000149897	-2.87917e-06	8.52173e-05	-5.30523e-06	-4.4619e-06						20.4644	4.5468	7.0888	5.68391e-05	7.46403	2.60723e-05	1.24545	3.56667e-06	5.25407e-07					1	0	0	20.4639	4.5467	7.08864	3.71237e-05	7.46388	2.89515e-05	1.24537	8.8719e-06	4.98731e-06	0	0	0
Lab 1	Apr 5, 2022	3	Zr_255	iRM_12			0.000491247	0.000114078	0.000165058	8.15018e-06	0.000148948	-1.14663e-06	8.9031e-05	-3.88383e-06	2.3523e-06						20.3213	4.51493	7.03892	5.22475e-05	7.41112	2.34597e-05	1.23656	-1.31589e-07	3.68314e-07					1	0	0	20.3208	4.51481	7.03876	4.40973e-05	7.41097	2.46063e-05	1.23647	3.75224e-06	-1.98399e-06	0	0	0
Lab 1	Jun 20, 2022	1	Zr_005	iRM_12			0.000233566	6.39275e-05	8.41303e-05	6.33768e-05	8.72252e-05	2.14455e-06	0.000148444	8.27392e-07	7.36518e-07						23.3358	5.18081	8.07081	0.00013421	8.48462	4.05402e-05	1.41366	2.00073e-05	3.43023e-06					1	0	0	23.3356	5.18074	8.07073	7.08331e-05	8.48453	3.83956e-05	1.41351	1.91799e-05	2.69371e-06	0	0	0
Lab 1	Jun 20, 2022	1	Zr_010	iRM_1			0.000292497	7.57701e-05	0.000100802	6.62469e-05	9.99522e-05	4.74378e-06	0.000154551	1.12463e-05	5.46534e-07						23.1672	5.1435	8.01268	0.000135381	8.42381	4.00212e-05	1.40356	1.72454e-05	5.72839e-06					1	0	0	23.1669	5.14343	8.01258	6.91342e-05	8.42371	3.52774e-05	1.40341	5.99905e-06	5.18185e-06	0	0	0
Lab 1	Jun 20, 2022	1	Zr_015	iRM_12			0.000297699	8.11332e-05	0.000102882	4.98607e-05	0.000100395	3.22785e-06	0.000149989	8.65764e-06	4.17244e-06						23.039	5.11501	7.96842	0.000126258	8.3773	3.82494e-05	1.39582	2.02018e-05	2.54422e-06					1	0	0	23.0387	5.11493	7.96831	7.63974e-05	8.3772	3.50215e-05	1.39567	1.15441e-05	-1.62822e-06	0	0	0
Lab 1	Jun 20, 2022	1	Zr_020	iRM_2			0.000295102	7.0996e-05	9.88813e-05	5.09728e-05	0.00011112	7.87742e-06	0.000152913	1.27213e-05	5.27903e-07						23.1483	5.13943	8.00672	0.000120888	8.41816	3.82888e-05	1.40271	1.48995e-05	4.23884e-06					1	0	0	23.148	5.13936	8.00662	6.99154e-05	8.41805	3.04114e-05	1.40256	2.17818e-06	3.71094e-06	0	0	0
Lab 1	Jun 20, 2022	1	Zr_025	iRM_12			0.000292264	6.65169e-05	9.78856e-05	4.76327e-05	0.000101305	4.41516e-06	0.000151529	2.44681e-06	1.727e-06						22.971	5.10016	7.94555	0.000119397	8.35395	5.19331e-05	1.39205	1.71706e-05	4.24511e-06					1	0	0	22.9707	5.1001	7.94545	7.1764e-05	8.35384	4.7518e-05	1.3919	1.47237e-05	2.51811e-06	0	0	0
Lab 1	Jun 20, 2022	1	Zr_030	iRM_10			0.000290052	7.39067e-05	9.39378e-05	4.14489e-05	0.000102556	1.8189e-05	0.000155478	-3.33662e-07	7.6162e-07						23.0796	5.12437	7.98358	0.000111155	8.39448	5.24631e-05	1.39889	1.06175e-05	3.4622e-06					1	0	0	23.0793	5.1243	7.98349	6.97062e-05	8.39438	3.42742e-05	1.39874	1.09511e-05	2.70058e-06	0	0	0
Lab 1	Jun 20, 2022	1	Zr_035	iRM_12			0.000283527	7.67252e-05	9.90846e-05	4.78435e-05	9.22657e-05	2.05473e-05	0.000148456	-5.13188e-07	-2.39979e-06						22.9226	5.08954	7.92939	0.000112328	8.33752	4.21182e-05	1.3894	1.44717e-05	3.99514e-06					1	0	0	22.9223	5.08946	7.92929	6.44848e-05	8.33742	2.15709e-05	1.38925	1.49849e-05	6.39493e-06	0	0	0
Lab 1	Jun 20, 2022	1	Zr_040	iRM_11			0.00028451	6.799e-05	0.00010267	5.24611e-05	0.000100985	6.11256e-06	0.000146115	1.25237e-05	-7.06344e-07						22.919	5.08877	7.92828	0.000110356	8.33655	4.40537e-05	1.38926	1.4515e-05	3.92225e-06					1	0	0	22.9187	5.0887	7.92818	5.7895e-05	8.33645	3.79411e-05	1.38911	1.99123e-06	4.6286e-06	0	0	0
Lab 1	Jun 20, 2022	1	Zr_045	iRM_12			0.000339043	8.22747e-05	0.000105623	5.1289e-05	0.000109882	2.22327e-06	0.000148058	1.6551e-05	3.92918e-06						22.9194	5.08892	7.9286	0.000111802	8.33706	3.78778e-05	1.38938	1.55363e-05	4.82322e-06					1	0	0	22.919	5.08884	7.9285	6.05127e-05	8.33695	3.56546e-05	1.38923	-1.01463e-06	8.94043e-07	0	0	0
Lab 1	Jun 20, 2022	1	Zr_050	iRM			0.000292425	7.31031e-05	0.000100944	4.63996e-05	0.000109528	7.00478e-06	0.000152279	2.37039e-05	3.5447e-06						23.5369	5.22612	8.1424	0.000115065	8.56211	3.9001e-05	1.4269	1.45986e-05	3.49478e-06					1	0	0	23.5366	5.22604	8.1423	6.86656e-05	8.562	3.19962e-05	1.42674	-9.10534e-06	-4.99191e-08	0	0	0
Lab 1	Jun 20, 2022	1	Zr_055	iRM_12			0.000284481	8.05766e-05	0.000102496	5.22082e-05	0.000104688	8.36879e-06	0.00014747	1.31206e-05	2.75327e-06						22.8414	5.07171	7.90197	0.000107094	8.3094	4.01608e-05	1.38483	1.2748e-05	5.83461e-06					1	0	0	22.8411	5.07163	7.90187	5.4886e-05	8.30929	3.1792e-05	1.38468	-3.72591e-07	3.08135e-06	0	0	0
Lab 1	Jun 20, 2022	1	Zr_060	iRM_1			0.00192672	0.000442172	0.000663443	4.40893e-05	0.000705641	4.5146e-06	0.000245864	3.64018e-06	1.89035e-06						22.9549	5.09708	7.94166	0.000110068	8.3516	3.9137e-05	1.39194	1.6704e-05	7.09665e-06					1	0	0	22.9529	5.09663	7.941	6.59792e-05	8.3509	3.46224e-05	1.3917	1.30638e-05	5.2063e-06	0	0	0
Lab 1	Jun 20, 2022	1	Zr_065	iRM_12			0.000279851	7.75081e-05	9.20789e-05	3.9939e-05	0.000105864	4.58809e-06	0.000160051	5.05283e-06	2.65368e-06						22.8329	5.07002	7.89956	0.00010801	8.30752	3.93417e-05	1.38461	1.40442e-05	4.61297e-06					1	0	0	22.8326	5.06994	7.89947	6.80707e-05	8.30741	3.47536e-05	1.38445	8.99137e-06	1.95929e-06	0	0	0
Lab 1	Jun 20, 2022	1	Zr_070	iRM_2			0.00279611	0.00062263	0.000958836	3.72231e-05	0.00102963	4.83254e-06	0.000319489	1.24098e-05	1.23193e-06						23.2282	5.15786	8.03651	0.00010663	8.45167	3.70749e-05	1.40867	2.2658e-05	9.48538e-07					1	0	0	23.2254	5.15724	8.03556	6.94066e-05	8.45064	3.22423e-05	1.40835	1.02482e-05	-2.83392e-07	0	0	0
Lab 1	Jun 20, 2022	1	Zr_075	iRM_12			0.000302475	7.36836e-05	0.000100929	5.02291e-05	0.000118971	3.56946e-06	0.000156904	7.05057e-06	2.90154e-06						22.614	5.02159	7.82423	0.000102612	8.22861	3.84646e-05	1.37154	1.40565e-05	5.57176e-06					1	0	0	22.6137	5.02151	7.82413	5.23825e-05	8.2285	3.48951e-05	1.37138	7.00589e-06	2.67022e-06	0	0	0
Lab 1	Jun 20, 2022	1	Zr_080	iRM_10			0.00196616	0.000448988	0.000678921	3.45636e-05	0.000725536	5.84451e-06	0.000265537	1.08802e-05	1.08486e-07						22.9658	5.09974	7.94615	9.4761e-05	8.35704	3.61607e-05	1.39299	1.12304e-05	1.62677e-06					1	0	0	22.9638	5.09929	7.94548	6.01974e-05	8.35632	3.03162e-05	1.39272	3.50143e-07	1.51829e-06	0	0	0
Lab 1	Jun 20, 2022	1	Zr_085	iRM_12			0.000278402	6.69364e-05	9.6442e-05	3.79227e-05	0.000105624	4.66582e-06	0.000159382	1.40441e-05	2.12317e-06						22.8629	5.07685	7.91049	9.8143e-05	8.3195	3.79981e-05	1.38671	1.51778e-05	4.76553e-06					1	0	0	22.8626	5.07678	7.91039	6.02204e-05	8.3194	3.33323e-05	1.38655	1.13366e-06	2.64236e-06	0	0	0
Lab 1	Jun 20, 2022	1	Zr_090	iRM_11			0.000275648	6.91657e-05	9.32278e-05	3.82017e-05	0.000100904	6.62497e-06	0.000147057	1.46501e-05	8.45656e-08						23.2373	5.16005	8.04024	9.02445e-05	8.45628	3.78289e-05	1.40953	1.50364e-05	3.18551e-06					1	0	0	23.237	5.15998	8.04014	5.20428e-05	8.45618	3.1204e-05	1.40938	3.86273e-07	3.10094e-06	0	0	0
Lab 1	Jun 20, 2022	1	Zr_095	iRM_12			0.000286076	7.5633e-05	8.42305e-05	3.27324e-05	9.90932e-05	2.96308e-06	0.00014066	1.63984e-05	-7.21101e-07						22.7276	5.04693	7.86402	9.12484e-05	8.27095	3.8294e-05	1.37867	1.69753e-05	5.421e-06					1	0	0	22.7273	5.04686	7.86393	5.85159e-05	8.27085	3.5331e-05	1.37853	5.76966e-07	6.1421e-06	0	0	0
Lab 1	Jun 20, 2022	1	Zr_100	iRM			0.000324132	6.9353e-05	0.000108686	2.92889e-05	0.000124123	6.15338e-06	0.00016884	6.49175e-06	5.60542e-06						23.6531	5.25251	8.18439	8.91924e-05	8.60814	4.02348e-05	1.43491	1.94081e-05	2.18378e-06					1	0	0	23.6528	5.25244	8.18428	5.99035e-05	8.60801	3.40814e-05	1.43474	1.29164e-05	-3.42164e-06	0	0	0
Lab 1	Jun 20, 2022	1	Zr_105	iRM_12			0.000271606	7.44872e-05	9.3546e-05	2.96136e-05	0.000101898	4.65422e-06	0.000145491	9.29009e-06	1.14166e-06						22.7356	5.04877	7.867	9.10691e-05	8.27435	3.97692e-05	1.37929	2.01465e-05	5.61169e-06					1	0	0	22.7353	5.04869	7.86691	6.14555e-05	8.27425	3.5115e-05	1.37914	1.08564e-05	4.47003e-06	0	0	0
Lab 1	Jun 20, 2022	1	Zr_110	iRM_1			0.000276745	4.62341e-05	8.47875e-05	2.75124e-05	0.000106882	6.33046e-06	0.000152626	1.67343e-05	4.01398e-06						23.0768	5.12461	7.98529	9.00468e-05	8.39903	3.89049e-05	1.40008	1.56065e-05	7.25927e-06					1	0	0	23.0765	5.12456	7.98521	6.25343e-05	8.39892	3.25744e-05	1.39993	-1.12781e-06	3.24529e-06	0	0	0
Lab 1	Jun 20, 2022	1	Zr_115	iRM_12			0.000271621	7.48353e-05	9.28301e-05	2.77795e-05	0.000101455	5.85742e-06	0.000130679	8.91313e-06	4.39178e-06						22.57	5.01208	7.80991	8.25319e-05	8.21453	3.87617e-05	1.36933	1.87275e-05	5.02696e-06					1	0	0	22.5697	5.012	7.80982	5.47524e-05	8.21443	3.29043e-05	1.3692	9.81433e-06	6.35179e-07	0	0	0
Lab 1	Jun 20, 2022	1	Zr_120	iRM_2			0.000271263	7.32431e-05	9.46478e-05	2.62726e-05	9.59953e-05	5.20038e-06	0.00014625	1.28476e-05	6.38449e-06						23.3185	5.17841	8.06925	8.52756e-05	8.48759	3.74638e-05	1.41491	1.12838e-05	4.26692e-06					1	0	0	23.3183	5.17833	8.06916	5.9003e-05	8.48749	3.22634e-05	1.41476	-1.56376e-06	-2.11757e-06	0	0	0
Lab 1	Jun 20, 2022	1	Zr_125	iRM_12			0.000272402	7.15287e-05	9.82509e-05	2.59725e-05	9.2092e-05	3.28736e-06	0.000160811	6.17767e-06	5.5858e-06						22.6773	5.03598	7.84731	8.54089e-05	8.2541	3.69317e-05	1.37596	1.46559e-05	5.58153e-06					1	0	0	22.6771	5.03591	7.84721	5.94364e-05	8.25401	3.36444e-05	1.3758	8.47818e-06	-4.2725e-09	0	0	0
Lab 1	Jun 20, 2022	1	Zr_130	iRM_10			0.000273224	7.48266e-05	9.9674e-05	2.3274e-05	0.000107597	6.30155e-06	0.000139064	2.58775e-06	5.66309e-06						23.0356	5.11569	7.97165	8.15274e-05	8.38528	3.84557e-05	1.39793	1.64783e-05	3.45438e-06					1	0	0	23.0354	5.11561	7.97155	5.82534e-05	8.38517	3.21541e-05	1.39779	1.38906e-05	-2.20871e-06	0	0	0
Lab 1	Jun 20, 2022	1	Zr_135	iRM_12			0.000267224	8.42879e-05	9.61267e-05	2.63628e-05	9.93926e-05	3.23748e-06	0.000158204	3.30454e-06	1.70392e-06						22.7008	5.0413	7.85564	7.75145e-05	8.26317	3.89132e-05	1.37754	1.59115e-05	5.71881e-06					1	0	0	22.7005	5.04122	7.85554	5.11517e-05	8.26307	3.56757e-05	1.37738	1.2607e-05	4.01488e-06	0	0	0
Lab 1	Jun 20, 2022	1	Zr_140	iRM_11			0.000271394	7.88979e-05	9.29597e-05	2.97367e-05	9.22267e-05	3.57902e-06	0.00015853	6.24648e-06	5.40562e-06						23.1689	5.14528	8.01782	7.53156e-05	8.4339	3.6811e-05	1.40603	1.43235e-05	3.07172e-06					1	0	0	23.1687	5.1452	8.01773	4.55789e-05	8.43381	3.3232e-05	1.40587	8.077e-06	-2.3339e-06	0	0	0
Lab 1	Jun 20, 2022	1	Zr_145	iRM_12			0.000269462	7.48501e-05	8.51586e-05	2.08546e-05	9.98654e-05	8.08495e-06	0.000152934	-3.65325e-06	4.40484e-06						22.5546	5.00883	7.8052	7.9116e-05	8.21026	3.69686e-05	1.36876	9.17788e-06	6.30558e-06					1	0	0	22.5544	5.00875	7.80511	5.82614e-05	8.21016	2.88837e-05	1.3686	1.28311e-05	1.90074e-06	0	0	0
Lab 1	Jun 20, 2022	1	Zr_150	iRM			0.000274799	6.7609e-05	9.36433e-05	2.91394e-05	0.000101706	5.84674e-06	0.000161851	-5.99566e-06	5.70205e-06						23.4946	5.21762	8.13055	7.75646e-05	8.55262	3.52993e-05	1.42585	6.38817e-06	1.66705e-06					1	0	0	23.4943	5.21756	8.13046	4.84252e-05	8.55252	2.94526e-05	1.42568	1.23838e-05	-4.035e-06	0	0	0
Lab 1	Jun 20, 2022	1	Zr_155	iRM_12			0.00264869	0.000588614	0.000918742	1.88044e-05	0.00095964	-8.6895e-07	0.000296703	-5.28364e-07	2.99223e-06						22.5745	5.01335	7.81231	7.38567e-05	8.21786	3.69313e-05	1.37005	1.37565e-05	5.728e-06					1	0	0	22.5718	5.01276	7.81139	5.50523e-05	8.2169	3.78003e-05	1.36975	1.42848e-05	2.73577e-06	0	0	0
Lab 1	Jun 20, 2022	1	Zr_160	iRM_1			0.000276849	5.48918e-05	9.81891e-05	2.25296e-05	0.000102972	7.64367e-06	0.000154985	9.61442e-06	1.29282e-06						23.1013	5.13039	7.99479	7.34568e-05	8.41011	3.71385e-05	1.40213	1.2137e-05	4.85292e-06					1	0	0	23.101	5.13033	7.99469	5.09272e-05	8.41001	2.94948e-05	1.40198	2.5226e-06	3.5601e-06	0	0	0
Lab 1	Jun 20, 2022	1	Zr_165	iRM_12			0.000284135	6.50912e-05	9.32956e-05	1.94678e-05	9.76146e-05	3.67774e-06	0.000150163	1.46934e-06	3.9906e-06						22.5382	5.00528	7.7998	7.16739e-05	8.20486	3.73006e-05	1.36787	1.6143e-05	5.92579e-06					1	0	0	22.5379	5.00522	7.79971	5.22061e-05	8.20476	3.36228e-05	1.36772	1.46736e-05	1.93518e-06	0	0	0
Lab 1	Jun 20, 2022	1	Zr_170	iRM_2			0.000271421	6.07339e-05	9.62417e-05	1.55296e-05	0.000100611	5.93449e-06	0.000148489	5.94071e-06	3.96975e-06						23.295	5.1734	8.06194	7.4357e-05	8.48089	3.72219e-05	1.41395	1.24013e-05	2.25873e-06					1	0	0	23.2947	5.17334	8.06184	5.88275e-05	8.48079	3.12874e-05	1.4138	6.46063e-06	-1.71102e-06	0	0	0
Lab 1	Jun 20, 2022	1	Zr_175	iRM_12			0.000292014	6.96268e-05	0.000103913	1.58507e-05	0.00010244	6.48886e-06	0.000157158	1.36661e-05	1.61396e-06						22.5437	5.00651	7.80187	7.03592e-05	8.20721	3.41936e-05	1.36832	1.09192e-05	5.85636e-06					1	0	0	22.5434	5.00644	7.80176	5.45086e-05	8.20711	2.77047e-05	1.36817	-2.7469e-06	4.24239e-06	0	0	0
Lab 1	Jun 20, 2022	1	Zr_180	iRM_10			0.000279109	6.32608e-05	8.68645e-05	1.40437e-05	9.53427e-05	2.92927e-06	0.000150907	1.12281e-05	3.20751e-06						23.0908	5.12809	7.99133	7.32285e-05	8.40664	3.34879e-05	1.40155	1.49476e-05	4.14087e-06					1	0	0	23.0905	5.12802	7.99125	5.91848e-05	8.40654	3.05586e-05	1.4014	3.71957e-06	9.33359e-07	0	0	0
Lab 1	Jun 20, 2022	1	Zr_185	iRM_12			0.000271442	5.49899e-05	9.30274e-05	1.66971e-05	9.9599e-05	3.30962e-06	0.000141237	1.28807e-05	2.25445e-06						22.5266	5.00274	7.79596	7.02797e-05	8.20099	3.60079e-05	1.36727	1.40939e-05	5.40011e-06					1	0	0	22.5263	5.00269	7.79587	5.35826e-05	8.20089	3.26983e-05	1.36713	1.2132e-06	3.14566e-06	0	0	0
Lab 1	Jun 20, 2022	1	Zr_190	iRM_11			0.000275347	6.73382e-05	0.000103298	2.06294e-05	0.000105289	2.78084e-06	0.000135441	9.09896e-06	3.03756e-06						23.2059	5.15375	8.03133	6.69735e-05	8.4489	3.51761e-05	1.40864	8.33638e-06	1.65211e-06					1	0	0	23.2057	5.15368	8.03123	4.63441e-05	8.44879	3.23953e-05	1.4085	-7.62587e-07	-1.38545e-06	0	0	0
Lab 1	Jun 20, 2022	1	Zr_195	iRM_12			0.000284552	5.73027e-05	8.7589e-05	9.92817e-06	0.000105202	7.25778e-06	0.000139829	1.88397e-05	5.55903e-06						22.4222	4.97961	7.76	6.74191e-05	8.16326	3.59306e-05	1.361	1.23776e-05	4.59253e-06					1	0	0	22.4219	4.97955	7.75991	5.74909e-05	8.16315	2.86728e-05	1.36086	-6.4621e-06	-9.66497e-07	0	0	0
Lab 1	Jun 20, 2022	1	Zr_200	iRM			0.000276497	6.5106e-05	9.02464e-05	1.15583e-05	9.58844e-05	4.37424e-06	0.000130856	1.2128e-05	5.44419e-07						23.6116	5.24375	8.17154	6.51683e-05	8.59627	3.30671e-05	1.43318	7.88709e-06	2.49359e-06					1	0	0	23.6113	5.24368	8.17145	5.36101e-05	8.59618	2.86929e-05	1.43305	-4.24092e-06	1.94917e-06	0	0	0
Lab 1	Jun 20, 2022	1	Zr_205	iRM_12			0.000318183	6.55376e-05	0.000108657	1.77057e-05	0.000117268	4.92088e-06	0.000135877	2.39004e-06	3.34791e-06						22.5573	5.00956	7.80668	6.78453e-05	8.21241	3.40212e-05	1.36918	7.58824e-06	5.13913e-06					1	0	0	22.557	5.0095	7.80657	5.01396e-05	8.2123	2.91003e-05	1.36904	5.1982e-06	1.79122e-06	0	0	0
Lab 1	Jun 20, 2022	1	Zr_210	iRM_1			0.000308458	6.86628e-05	0.000104019	1.24047e-05	0.00010044	5.10988e-06	0.000134332	9.44281e-07	-2.85645e-07						23.2505	5.16368	8.0469	6.8666e-05	8.46542	3.59823e-05	1.41139	8.67722e-06	3.06328e-06					1	0	0	23.2502	5.16361	8.0468	5.62613e-05	8.46531	3.08724e-05	1.41126	7.73294e-06	3.34893e-06	0	0	0
Lab 1	Jun 20, 2022	1	Zr_215	iRM_12			0.00028186	6.03709e-05	9.10007e-05	1.34074e-05	9.5241e-05	7.90056e-06	0.000144199	4.01539e-06	4.0257e-06						22.502	4.99743	7.78785	6.28733e-05	8.19287	3.40829e-05	1.36596	1.56955e-05	4.9572e-06					1	0	0	22.5018	4.99737	7.78776	4.94659e-05	8.19278	2.61824e-05	1.36581	1.16801e-05	9.31494e-07	0	0	0
Lab 1	Jun 20, 2022	2	Zr_005	iRM_12			0.000258269	7.03679e-05	8.63341e-05	6.56033e-06	9.6127e-05	6.35552e-06	0.000129609	4.30015e-06	3.47149e-06						22.5689	5.01232	7.81102	6.23326e-05	8.21734	3.59666e-05	1.37005	1.25566e-05	4.07071e-06					1	0	0	22.5687	5.01224	7.81094	5.57723e-05	8.21725	2.96111e-05	1.36992	8.25647e-06	5.99221e-07	0	0	0
Lab 1	Jun 20, 2022	2	Zr_010	iRM_1			0.000282331	6.30793e-05	9.43916e-05	9.74827e-06	0.000100335	6.69169e-06	0.000148716	-8.92292e-06	4.40831e-06						23.3239	5.18008	8.07267	6.90487e-05	8.49292	3.53233e-05	1.41608	9.04867e-06	7.38929e-06					1	0	0	23.3236	5.18001	8.07257	5.93004e-05	8.49282	2.86316e-05	1.41593	1.79716e-05	2.98098e-06	0	0	0
Lab 1	Jun 20, 2022	2	Zr_015	iRM_12			0.000288872	7.27281e-05	0.000100054	1.36234e-05	0.000106732	5.94278e-06	0.000134063	-4.20818e-06	6.62629e-06						22.4269	4.9808	7.76208	6.59998e-05	8.16595	3.38946e-05	1.36153	1.27876e-05	9.04412e-06					1	0	0	22.4266	4.98073	7.76198	5.23764e-05	8.16584	2.79518e-05	1.36139	1.69958e-05	2.41783e-06	0	0	0
Lab 1	Jun 20, 2022	2	Zr_020	iRM_2			0.000289283	7.33382e-05	9.27624e-05	2.04313e-05	0.000106651	5.18159e-06	0.000135537	8.3929e-07	3.88907e-06						23.4339	5.20456	8.11086	5.91537e-05	8.53323	3.45317e-05	1.4228	9.13213e-06	5.31921e-06					1	0	0	23.4336	5.20449	8.11077	3.87225e-05	8.53312	2.93501e-05	1.42267	8.29284e-06	1.43015e-06	0	0	0
Lab 1	Jun 20, 2022	2	Zr_025	iRM_12			0.000302428	8.56928e-05	9.91201e-05	1.29601e-05	0.000112114	5.16964e-06	0.000142639	5.8511e-06	8.18698e-06						22.2573	4.94327	7.70367	6.48037e-05	8.10472	3.3944e-05	1.35134	1.23066e-05	8.92064e-06					1	0	0	22.257	4.94318	7.70358	5.18436e-05	8.10461	2.87744e-05	1.35119	6.45548e-06	7.33661e-07	0	0	0
Lab 1	Jun 20, 2022	2	Zr_030	iRM_10			0.000291415	6.89156e-05	9.41057e-05	2.02423e-05	9.11432e-05	7.25505e-06	0.000147377	2.86978e-06	4.19918e-06						23.285	5.17156	8.05951	6.30077e-05	8.47945	3.37547e-05	1.41388	1.16266e-05	5.77149e-06					1	0	0	23.2847	5.17149	8.05941	4.27654e-05	8.47936	2.64996e-05	1.41373	8.75683e-06	1.57231e-06	0	0	0
Lab 1	Jun 20, 2022	2	Zr_035	iRM_12			0.00028023	6.90079e-05	9.46479e-05	1.56825e-05	0.000103541	4.73442e-06	0.000143766	-2.75044e-06	9.33982e-06						22.3126	4.95559	7.72309	6.2488e-05	8.12557	3.42801e-05	1.3549	1.24912e-05	7.66379e-06					1	0	0	22.3123	4.95553	7.723	4.68054e-05	8.12547	2.95456e-05	1.35475	1.52416e-05	-1.67603e-06	0	0	0
Lab 1	Jun 20, 2022	2	Zr_040	iRM_11			0.000296095	7.22432e-05	8.92035e-05	1.74836e-05	9.34899e-05	7.85277e-06	0.000155026	1.10603e-05	5.10438e-06						23.2952	5.17389	8.06329	6.119e-05	8.4836	3.33607e-05	1.41464	1.26787e-05	3.69825e-06					1	0	0	23.2949	5.17382	8.0632	4.37064e-05	8.48351	2.55079e-05	1.41448	1.61832e-06	-1.40613e-06	0	0	0
Lab 1	Jun 20, 2022	2	Zr_045	iRM_12			0.000674545	0.000158073	0.000223667	1.12881e-05	0.000260638	5.46723e-06	0.000171415	1.93424e-06	5.05289e-06						22.4171	4.97886	7.75946	6.17801e-05	8.16406	3.22891e-05	1.36133	1.50289e-05	6.77031e-06					1	0	0	22.4164	4.9787	7.75924	5.0492e-05	8.1638	2.68219e-05	1.36116	1.30946e-05	1.71742e-06	0	0	0
Lab 1	Jun 20, 2022	2	Zr_050	iRM			0.00027614	5.52251e-05	9.25325e-05	5.86693e-06	9.96409e-05	7.58203e-06	0.000130449	1.4935e-05	4.14822e-06						23.4969	5.21874	8.13323	5.78682e-05	8.55737	3.3866e-05	1.42688	1.42079e-05	4.42193e-06					1	0	0	23.4966	5.21868	8.13314	5.20012e-05	8.55727	2.6284e-05	1.42675	-7.27044e-07	2.73704e-07	0	0	0
Lab 1	Jun 20, 2022	2	Zr_055	iRM_12			0.000280042	5.66059e-05	9.08592e-05	1.6457e-05	9.95212e-05	4.19969e-06	0.000139728	1.23047e-05	1.63742e-06						22.3821	4.97114	7.74743	6.35262e-05	8.1514	3.42325e-05	1.35924	1.56691e-05	7.24297e-06					1	0	0	22.3818	4.97108	7.74734	4.70692e-05	8.1513	3.00328e-05	1.3591	3.36444e-06	5.60555e-06	0	0	0
Lab 1	Jun 20, 2022	2	Zr_060	iRM_1			0.000283714	3.0026e-05	0.000104709	8.71555e-06	0.000100784	7.98192e-06	0.000142134	1.18637e-05	7.28933e-06						23.2763	5.16985	8.05732	6.11544e-05	8.47799	3.46044e-05	1.41376	1.55516e-05	7.68225e-06					1	0	0	23.276	5.16982	8.05722	5.24389e-05	8.47788	2.66225e-05	1.41362	3.6879e-06	3.92923e-07	0	0	0
Lab 1	Jun 20, 2022	2	Zr_065	iRM_12			0.000274497	6.46804e-05	9.42324e-05	2.31358e-05	0.000106061	9.67441e-06	0.000130237	1.46261e-05	7.94135e-06						22.2533	4.94255	7.70295	6.00786e-05	8.10488	3.40777e-05	1.35152	2.04555e-05	6.60909e-06					1	0	0	22.253	4.94249	7.70286	3.69428e-05	8.10477	2.44033e-05	1.35139	5.8294e-06	-1.33226e-06	0	0	0
Lab 1	Jun 20, 2022	2	Zr_070	iRM_2			0.000291337	6.28114e-05	8.90533e-05	2.16289e-05	0.000104804	5.88733e-06	0.000143159	1.29647e-05	7.97971e-06						23.6331	5.24919	8.18109	5.93611e-05	8.60844	3.48171e-05	1.43555	1.48935e-05	6.19583e-06					1	0	0	23.6328	5.24912	8.181	3.77321e-05	8.60833	2.89297e-05	1.43541	1.92885e-06	-1.78388e-06	0	0	0
Lab 1	Jun 20, 2022	2	Zr_075	iRM_12			0.000286284	5.5737e-05	9.22144e-05	1.10419e-05	9.99642e-05	6.55435e-06	0.000127305	9.98058e-06	3.15293e-06						22.1584	4.92159	7.67055	5.79848e-05	8.07115	3.47068e-05	1.34596	1.38889e-05	7.19752e-06					1	0	0	22.1581	4.92154	7.67046	4.69429e-05	8.07105	2.81525e-05	1.34583	3.90828e-06	4.04459e-06	0	0	0
Lab 1	Jun 20, 2022	2	Zr_080	iRM_10			0.000287581	5.4725e-05	9.3213e-05	1.43407e-05	0.000103664	3.03848e-06	0.000126384	5.33402e-07	9.83253e-06						23.1338	5.13828	8.00822	5.98002e-05	8.42652	3.34412e-05	1.40522	9.7105e-06	6.52054e-06					1	0	0	23.1335	5.13823	8.00812	4.54595e-05	8.42642	3.04027e-05	1.4051	9.1771e-06	-3.312e-06	0	0	0
Lab 1	Jun 20, 2022	2	Zr_085	iRM_12			0.000285074	6.56924e-05	9.47863e-05	7.20266e-06	0.000108091	5.60995e-06	0.000130775	1.29586e-05	4.86904e-06						22.3713	4.96892	7.7444	6.36221e-05	8.14907	3.35679e-05	1.35897	1.0633e-05	6.96678e-06					1	0	0	22.371	4.96886	7.74431	5.64195e-05	8.14896	2.79579e-05	1.35884	-2.32563e-06	2.09774e-06	0	0	0
Lab 1	Jun 20, 2022	2	Zr_090	iRM_11			0.000287223	7.58681e-05	0.000105068	1.03755e-05	9.18586e-05	8.4615e-06	0.000141135	-1.79389e-06	4.50686e-06						23.3518	5.18678	8.08399	6.03436e-05	8.50666	3.2434e-05	1.41863	8.21725e-06	2.89599e-06					1	0	0	23.3515	5.18671	8.08388	4.99681e-05	8.50657	2.39725e-05	1.41849	1.00111e-05	-1.61088e-06	0	0	0
Lab 1	Jun 20, 2022	2	Zr_095	iRM_12			0.000286409	7.21001e-05	0.000105416	8.18727e-06	0.000112255	5.74653e-06	0.000141919	3.98197e-06	2.3735e-06						22.4641	4.98962	7.77667	6.20833e-05	8.18319	3.42856e-05	1.36468	1.31684e-05	7.07209e-06					1	0	0	22.4638	4.98954	7.77657	5.3896e-05	8.18308	2.85391e-05	1.36454	9.18641e-06	4.69859e-06	0	0	0
Lab 1	Jun 20, 2022	2	Zr_100	iRM			0.000920788	0.000212181	0.000314987	1.4767e-05	0.000337645	3.41992e-06	0.00017495	6.08184e-06	5.52488e-06						23.6242	5.24742	8.17862	5.85886e-05	8.60653	3.33401e-05	1.43533	1.48149e-05	4.48725e-06					1	0	0	23.6233	5.24721	8.1783	4.38216e-05	8.60619	2.99201e-05	1.43516	8.73308e-06	-1.03763e-06	0	0	0
Lab 1	Jun 20, 2022	2	Zr_105	iRM_12			0.000278232	5.20346e-05	0.000104108	1.48691e-05	0.000124216	7.27671e-06	0.000126118	2.62963e-06	8.60878e-06						22.0921	4.90704	7.64803	5.55846e-05	8.04791	3.4268e-05	1.34217	8.22533e-06	6.73765e-06					1	0	0	22.0918	4.90699	7.64793	4.07155e-05	8.04778	2.69912e-05	1.34204	5.59571e-06	-1.87113e-06	0	0	0
Lab 1	Jun 20, 2022	2	Zr_110	iRM_1			0.000349052	8.82275e-05	0.000122239	1.84082e-05	0.000140848	7.1314e-06	0.000130246	9.83357e-06	4.49799e-06						23.5642	5.23417	8.15811	6.27718e-05	8.58515	3.50023e-05	1.43182	1.21518e-05	7.87754e-06					1	0	0	23.5639	5.23408	8.15798	4.43636e-05	8.58501	2.78709e-05	1.43169	2.31824e-06	3.37955e-06	0	0	0
Lab 1	Jun 20, 2022	2	Zr_115	iRM_12			0.000275812	7.05436e-05	9.76793e-05	8.68266e-06	0.000104367	2.38188e-06	0.000126775	-1.09859e-06	3.674e-06						22.1648	4.9233	7.67353	6.33984e-05	8.07505	3.37787e-05	1.34673	1.06989e-05	8.22319e-06					1	0	0	22.1646	4.92323	7.67343	5.47158e-05	8.07494	3.13969e-05	1.34661	1.17975e-05	4.5492e-06	0	0	0
Lab 1	Jun 20, 2022	2	Zr_120	iRM_2			0.00028243	7.21477e-05	9.37522e-05	6.70144e-06	0.000110084	5.6719e-06	0.00014295	7.09864e-06	4.31997e-06						23.7313	5.27126	8.2159	6.0406e-05	8.64588	3.49487e-05	1.44194	1.65524e-05	3.60549e-06					1	0	0	23.731	5.27119	8.2158	5.37046e-05	8.64577	2.92768e-05	1.4418	9.45371e-06	-7.14481e-07	0	0	0
Lab 1	Jun 20, 2022	2	Zr_125	iRM_12			0.000347637	8.77088e-05	0.000113009	1.01325e-05	0.00012452	3.32052e-06	0.000138789	5.91392e-06	6.12333e-06						22.2457	4.94136	7.70185	5.98099e-05	8.10518	3.45209e-05	1.35182	1.17446e-05	7.45365e-06					1	0	0	22.2453	4.94127	7.70174	4.96774e-05	8.10506	3.12003e-05	1.35168	5.83065e-06	1.33032e-06	0	0	0
Lab 1	Jun 20, 2022	2	Zr_130	iRM_10			0.000284767	7.90795e-05	9.8301e-05	1.83481e-05	0.000105002	1.40305e-06	0.000136063	1.01397e-05	5.64147e-06						23.2681	5.16847	8.05581	5.355e-05	8.47783	3.51355e-05	1.41395	1.11223e-05	5.5226e-06					1	0	0	23.2679	5.16839	8.05571	3.52019e-05	8.47772	3.37324e-05	1.41381	9.82555e-07	-1.18871e-07	0	0	0
Lab 1	Jun 20, 2022	2	Zr_135	iRM_12			0.000288806	5.73232e-05	9.91111e-05	6.08605e-06	0.000107235	1.8749e-06	0.000137818	5.13426e-06	5.48828e-06						22.2586	4.94415	7.70621	6.09616e-05	8.10977	3.25975e-05	1.35256	8.93895e-06	8.08189e-06					1	0	0	22.2583	4.94409	7.70611	5.48755e-05	8.10966	3.07226e-05	1.35243	3.80469e-06	2.59361e-06	0	0	0
Lab 1	Jun 20, 2022	2	Zr_140	iRM_11			0.000285473	7.90557e-05	9.88225e-05	1.44308e-05	0.000112335	8.21113e-06	0.000114499	9.51862e-06	8.45059e-06						23.4532	5.20967	8.1202	6.00188e-05	8.54589	3.33549e-05	1.42535	1.2079e-05	3.11036e-06					1	0	0	23.4529	5.20959	8.1201	4.55879e-05	8.54578	2.51438e-05	1.42524	2.56038e-06	-5.34023e-06	0	0	0
Lab 1	Jun 20, 2022	2	Zr_145	iRM_12			0.000284215	7.32703e-05	9.64862e-05	1.44818e-05	0.000105747	7.63105e-06	9.76585e-05	8.6008e-06	8.81098e-06						22.0174	4.8907	7.62297	5.88497e-05	8.02242	3.11149e-05	1.33801	1.31305e-05	9.29253e-06					1	0	0	22.0172	4.89062	7.62288	4.43679e-05	8.02232	2.34839e-05	1.33791	4.52967e-06	4.81544e-07	0	0	0
Lab 1	Jun 20, 2022	2	Zr_150	iRM			0.000285628	7.39127e-05	9.72669e-05	8.72148e-06	0.000106226	7.29455e-06	9.98376e-05	3.36157e-06	6.79366e-06						23.7074	5.2661	8.20815	5.80956e-05	8.6385	3.2803e-05	1.44078	8.72819e-06	3.80895e-06					1	0	0	23.7071	5.26603	8.20806	4.93742e-05	8.6384	2.55085e-05	1.44068	5.36662e-06	-2.98471e-06	0	0	0
Lab 1	Jun 20, 2022	2	Zr_155	iRM_12			0.000290443	8.03443e-05	9.21556e-05	1.12911e-05	0.000111596	5.15703e-06	0.000103427	1.32314e-05	5.99601e-06						22.1198	4.91356	7.6587	6.06817e-05	8.06022	3.22404e-05	1.34435	7.61726e-06	7.46302e-06					1	0	0	22.1195	4.91348	7.6586	4.93906e-05	8.06011	2.70834e-05	1.34425	-5.61415e-06	1.46701e-06	0	0	0
Lab 1	Jun 20, 2022	2	Zr_160	iRM_1			0.000280722	6.87549e-05	0.00010409	1.08918e-05	0.000104203	3.24011e-06	9.20033e-05	-3.0958e-06	6.10621e-06						23.4815	5.21599	8.13016	6.45887e-05	8.55653	3.55173e-05	1.42715	9.33938e-06	7.06491e-06					1	0	0	23.4812	5.21592	8.13005	5.36969e-05	8.55643	3.22772e-05	1.42706	1.24352e-05	9.58694e-07	0	0	0
Lab 1	Jun 20, 2022	2	Zr_165	iRM_12			0.000368326	8.75099e-05	0.000127067	1.94888e-05	0.000139929	9.57797e-06	9.42989e-05	4.10571e-06	6.24514e-06						22.3343	4.96122	7.73307	6.54285e-05	8.13873	3.30593e-05	1.35746	1.0902e-05	7.81324e-06					1	0	0	22.3339	4.96113	7.73295	4.59397e-05	8.13859	2.34814e-05	1.35736	6.79629e-06	1.56811e-06	0	0	0
Lab 1	Jun 20, 2022	2	Zr_170	iRM_2			0.000286803	5.05196e-05	0.000104488	2.22743e-05	0.000108013	4.84607e-06	9.32229e-05	-4.92198e-07	4.54734e-06						23.5773	5.23736	8.16364	6.64979e-05	8.59201	3.28163e-05	1.43311	6.88216e-06	5.1725e-06					1	0	0	23.577	5.23731	8.16353	4.42236e-05	8.5919	2.79702e-05	1.43301	7.37436e-06	6.25156e-07	0	0	0
Lab 1	Jun 20, 2022	2	Zr_175	iRM_12			0.00101856	0.000235535	0.00035049	8.10918e-06	0.000369907	4.50229e-06	0.000117955	1.1114e-05	6.6879e-06						22.2058	4.93269	7.68862	5.93606e-05	8.09189	3.19205e-05	1.34965	1.0727e-05	6.69154e-06					1	0	0	22.2048	4.93245	7.68827	5.12515e-05	8.09152	2.74182e-05	1.34953	-3.86999e-07	3.63272e-09	0	0	0
Lab 1	Jun 20, 2022	2	Zr_180	iRM_10			0.000287673	6.20494e-05	9.56348e-05	2.02422e-05	0.000100278	7.23057e-06	0.000111716	1.09283e-05	3.4521e-06						23.4997	5.22023	8.13712	6.20332e-05	8.56439	3.21141e-05	1.42855	8.29188e-06	4.57551e-06					1	0	0	23.4994	5.22017	8.13703	4.1791e-05	8.56429	2.48835e-05	1.42844	-2.63639e-06	1.12341e-06	0	0	0
Lab 1	Jun 20, 2022	2	Zr_185	iRM_12			0.000282588	6.45227e-05	9.97563e-05	1.38757e-05	9.79318e-05	4.80621e-06	9.2081e-05	7.70144e-06	4.43791e-06						22.0366	4.89515	7.63021	5.76019e-05	8.03086	3.07046e-05	1.33951	1.16248e-05	6.78962e-06					1	0	0	22.0363	4.89508	7.63011	4.37262e-05	8.03076	2.58984e-05	1.33942	3.92337e-06	2.35171e-06	0	0	0
Lab 1	Jun 20, 2022	2	Zr_190	iRM_11			0.000287214	6.90048e-05	0.000100658	1.38575e-05	0.000112207	8.41315e-06	8.31438e-05	2.06306e-06	5.47635e-06						23.5681	5.23541	8.16074	5.6131e-05	8.58927	3.23966e-05	1.43269	7.09435e-06	4.41421e-06					1	0	0	23.5678	5.23534	8.16064	4.22736e-05	8.58916	2.39834e-05	1.4326	5.0313e-06	-1.06214e-06	0	0	0
Lab 1	Jun 20, 2022	2	Zr_195	iRM_12			0.000289501	7.53147e-05	9.89285e-05	7.9382e-06	0.000104903	1.02717e-05	9.77453e-05	3.96158e-06	6.55555e-06						22.2865	4.95077	7.71717	5.39917e-05	8.12261	3.38264e-05	1.35489	5.89407e-06	7.08511e-06					1	0	0	22.2862	4.95069	7.71707	4.60535e-05	8.1225	2.35547e-05	1.35479	1.93249e-06	5.29559e-07	0	0	0
Lab 1	Jun 20, 2022	2	Zr_200	iRM			0.000889406	0.000200736	0.000309647	1.09247e-05	0.000331923	4.21107e-06	0.000160436	7.16161e-06	2.42827e-06						23.8353	5.29486	8.25355	5.39631e-05	8.68725	4.04747e-05	1.4491	1.87157e-06	5.52603e-06					1	0	0	23.8344	5.29466	8.25324	4.30384e-05	8.68691	3.62636e-05	1.44894	-5.29004e-06	3.09776e-06	0	0	0
Lab 1	Jun 20, 2022	2	Zr_205	iRM_12			0.000285128	6.26357e-05	0.000104276	6.51527e-06	0.000108675	2.1311e-05	0.000104223	7.34464e-06	6.67712e-06						22.3214	4.95854	7.72922	5.72283e-05	8.1353	3.4809e-05	1.35703	8.09372e-06	6.90497e-06					1	0	0	22.3211	4.95847	7.72912	5.0713e-05	8.13519	1.3498e-05	1.35692	7.49083e-07	2.27849e-07	0	0	0
Lab 1	Jun 20, 2022	2	Zr_210	iRM_1			0.000292986	7.17609e-05	9.56289e-05	1.17112e-05	0.000101904	2.94286e-06	8.79652e-05	3.05241e-06	8.59803e-06						23.7682	5.28003	8.23063	5.98299e-05	8.66348	3.40788e-05	1.44518	9.45184e-06	6.67264e-06					1	0	0	23.7679	5.27996	8.23054	4.81187e-05	8.66338	3.1136e-05	1.44509	6.39944e-06	-1.92539e-06	0	0	0
Lab 1	Jun 20, 2022	2	Zr_215	iRM_12			0.000278623	7.13503e-05	9.47067e-05	1.42539e-05	0.000112293	5.24604e-06	9.02098e-05	8.14502e-06	7.86269e-06						22.1812	4.92747	7.68089	5.96987e-05	8.08467	3.11537e-05	1.34859	1.5963e-05	7.9189e-06					1	0	0	22.1809	4.9274	7.6808	4.54448e-05	8.08456	2.59077e-05	1.3485	7.81798e-06	5.62166e-08	0	0	0
Lab 1	Jun 20, 2022	2	Zr_220	iRM_2			0.00028426	6.01239e-05	0.000109069	9.45704e-06	9.73122e-05	6.64139e-06	9.50013e-05	4.33658e-06	5.70682e-06						23.9184	5.31341	8.28265	5.52687e-05	8.71832	3.26268e-05	1.45433	1.03576e-05	3.52446e-06					1	0	0	23.9181	5.31335	8.28254	4.58117e-05	8.71822	2.59854e-05	1.45424	6.02106e-06	-2.18236e-06	0	0	0
Lab 1	Jun 20, 2022	2	Zr_225	iRM_12			0.000282111	6.82818e-05	9.28477e-05	1.46409e-05	0.000100177	2.81508e-06	8.71999e-05	2.47004e-06	3.19272e-06						22.0558	4.8997	7.63768	5.85226e-05	8.03945	3.20961e-05	1.34111	1.21086e-05	8.09129e-06					1	0	0	22.0555	4.89963	7.63759	4.38817e-05	8.03935	2.9281e-05	1.34102	9.63857e-06	4.89856e-06	0	0	0
Lab 1	Jun 20, 2022	2	Zr_230	iRM_10			0.00028293	7.30079e-05	0.000104691	1.465e-05	9.44447e-05	-3.562e-07	9.13009e-05	4.76489e-07	3.98706e-06						23.4903	5.21833	8.13451	5.97058e-05	8.56246	3.28051e-05	1.42836	3.58276e-06	2.77075e-06					1	0	0	23.49	5.21826	8.1344	4.50559e-05	8.56236	3.31613e-05	1.42827	3.10627e-06	-1.21631e-06	0	0	0
Lab 1	Jun 20, 2022	2	Zr_235	iRM_12			0.00028928	7.5514e-05	0.000102623	8.99123e-07	0.000110881	1.75757e-06	9.91741e-05	2.24687e-07	3.92949e-06						22.0908	4.90746	7.64983	5.40502e-05	8.05227	3.23964e-05	1.34325	1.1254e-05	7.917e-06					1	0	0	22.0905	4.90738	7.64972	5.31511e-05	8.05216	3.06389e-05	1.34315	1.10293e-05	3.98751e-06	0	0	0
Lab 1	Jun 20, 2022	2	Zr_240	iRM_11			0.000288085	7.52521e-05	0.000103963	1.16304e-05	9.94075e-05	9.3709e-06	9.04938e-05	2.79186e-06	5.95235e-06						23.6024	5.24337	8.17362	5.25216e-05	8.60397	3.34506e-05	1.43533	5.4206e-06	4.02852e-06					1	0	0	23.6021	5.24329	8.17352	4.08912e-05	8.60387	2.40797e-05	1.43524	2.62874e-06	-1.92383e-06	0	0	0
Lab 1	Jun 20, 2022	2	Zr_245	iRM_12			0.000291775	6.37042e-05	9.75261e-05	4.39932e-06	0.000101584	9.1963e-06	9.62268e-05	6.93021e-06	4.88222e-07						22.0376	4.89567	7.63167	5.14033e-05	8.03332	3.2658e-05	1.34012	1.31146e-05	6.76787e-06					1	0	0	22.0373	4.89561	7.63157	4.7004e-05	8.03321	2.34617e-05	1.34002	6.18437e-06	6.27964e-06	0	0	0
Lab 1	Jun 20, 2022	2	Zr_250	iRM			0.000284698	6.73947e-05	0.000100522	3.60986e-06	8.70964e-05	6.88545e-06	8.83417e-05	4.7442e-06	3.83271e-06						23.9207	5.3141	8.28391	4.98454e-05	8.72007	3.26006e-05	1.45471	1.06702e-05	4.80853e-06					1	0	0	23.9204	5.31403	8.28381	4.62355e-05	8.71999	2.57151e-05	1.45462	5.92602e-06	9.75819e-07	0	0	0
Lab 1	Jun 20, 2022	2	Zr_255	iRM_12			0.000331575	7.92255e-05	0.000113011	6.75252e-06	0.000123946	7.33485e-06	9.19258e-05	1.60387e-06	5.50971e-06						21.9863	4.88438	7.61408	5.18437e-05	8.01517	3.02165e-05	1.33714	1.05352e-05	9.00287e-06					1	0	0	21.986	4.8843	7.61397	4.50912e-05	8.01504	2.28816e-05	1.33705	8.93132e-06	3.49316e-06	0	0	0
Lab 1	Jun 21, 2022	3	Zr_005	iRM_12			0.000201502	4.47188e-05	6.9993e-05	1.32605e-05	6.55444e-05	1.80253e-06	0.000114168	-1.39583e-06	-4.99709e-06						20.8665	4.63556	7.22608	5.46592e-05	7.60637	2.47907e-05	1.2689	1.20679e-05	1.01375e-06					1	0	0	20.8663	4.63551	7.22601	4.13988e-05	7.6063	2.29881e-05	1.26878	1.34637e-05	6.01084e-06	0	0	0
Lab 1	Jun 21, 2022	3	Zr_010	iRM_UR			0.00024438	5.04182e-05	8.78661e-05	2.41745e-05	7.68851e-05	-1.50173e-06	0.000105449	-4.1821e-07	-4.42303e-06						22.0676	4.9025	7.64231	4.33312e-05	8.04479	2.36834e-05	1.3421	6.50851e-06	-2.72509e-06					1	0	0	22.0673	4.90245	7.64222	1.91567e-05	8.04471	2.51851e-05	1.34199	6.92672e-06	1.69794e-06	0	0	0
Lab 1	Jun 21, 2022	3	Zr_015	iRM_12			0.000237921	6.02068e-05	7.80177e-05	6.91196e-06	7.30088e-05	-2.32572e-06	0.000101268	1.05703e-05	1.66449e-06						20.3007	4.51008	7.03093	5.42538e-05	7.40184	2.51653e-05	1.23493	1.77345e-05	-2.37992e-07					1	0	0	20.3005	4.51002	7.03086	4.73419e-05	7.40176	2.7491e-05	1.23483	7.16416e-06	-1.90248e-06	0	0	0
Lab 1	Jun 21, 2022	3	Zr_020	SRM			0.000228092	4.09511e-05	8.85113e-05	9.91658e-06	6.26408e-05	2.58225e-07	9.57469e-05	9.43657e-06	-3.96872e-06						20.5856	4.57346	7.12969	5.16033e-05	7.50587	2.53133e-05	1.25229	1.13771e-05	1.86243e-06					1	0	0	20.5853	4.57341	7.12961	4.16868e-05	7.50581	2.5055e-05	1.25219	1.94055e-06	5.83115e-06	0	0	0
Lab 1	Jun 21, 2022	3	Zr_025	iRM_12			0.000780005	0.000167015	0.000276115	1.61901e-05	0.000262691	1.48624e-06	0.00012311	1.46434e-05	-3.33328e-06						20.1015	4.466	6.9624	5.42872e-05	7.33015	2.32527e-05	1.22304	1.15768e-05	-7.27455e-08					1	0	0	20.1008	4.46583	6.96213	3.80971e-05	7.32988	2.17665e-05	1.22292	-3.06656e-06	3.26054e-06	0	0	0
Lab 1	Jun 21, 2022	3	Zr_030	alfaA			0.000320174	5.86727e-05	0.000114382	8.32568e-06	0.000106047	4.81574e-07	9.47877e-05	3.14789e-06	-7.65461e-07						20.5384	4.56246	7.11186	4.12339e-05	7.48559	2.41563e-05	1.24868	1.05717e-05	-2.5311e-08					1	0	0	20.5381	4.5624	7.11174	3.29082e-05	7.48549	2.36747e-05	1.24858	7.42377e-06	7.40149e-07	0	0	0
Lab 1	Jun 21, 2022	3	Zr_035	iRM_12			0.000254315	5.84717e-05	8.6458e-05	6.38667e-06	7.89443e-05	-7.68541e-07	0.000105575	2.62551e-06	-3.24327e-06						19.9856	4.44034	6.92258	5.57097e-05	7.28852	2.52316e-05	1.21615	1.21948e-05	6.41117e-07					1	0	0	19.9853	4.44028	6.92249	4.9323e-05	7.28844	2.60001e-05	1.21605	9.56929e-06	3.88439e-06	0	0	0
Lab 1	Jun 21, 2022	3	Zr_040	Ames			0.00023705	5.30879e-05	8.09638e-05	8.42483e-06	6.42451e-05	3.94518e-07	8.32172e-05	7.29274e-06	-1.47821e-06						20.9183	4.64794	7.24685	3.77205e-05	7.63111	2.97074e-05	1.27349	1.19763e-05	9.33564e-06					1	0	0	20.9181	4.64789	7.24677	2.92957e-05	7.63104	2.93129e-05	1.2734	4.6836e-06	1.08139e-05	0	0	0
Lab 1	Jun 21, 2022	3	Zr_045	iRM_12			0.00194418	0.000424417	0.000671785	1.41189e-05	0.000703411	1.74009e-06	0.000194309	3.7959e-06	-8.23126e-06						19.9344	4.42904	6.90511	5.54037e-05	7.27042	2.51576e-05	1.21315	1.37375e-05	1.35023e-06					1	0	0	19.9324	4.42862	6.90444	4.12848e-05	7.26972	2.34175e-05	1.21295	9.94155e-06	9.58149e-06	0	0	0
Lab 1	Jun 21, 2022	3	Zr_050	IPGP			0.00023917	4.51682e-05	8.45075e-05	8.52995e-06	6.90639e-05	-7.25851e-07	0.0001002	8.94203e-06	-2.46272e-06						20.7566	4.61159	7.18967	3.62171e-05	7.56978	2.55204e-05	1.26307	1.5913e-05	1.83383e-06					1	0	0	20.7564	4.61155	7.18958	2.76872e-05	7.56971	2.62463e-05	1.26297	6.971e-06	4.29655e-06	0	0	0
Lab 1	Jun 21, 2022	3	Zr_055	iRM_12			0.000283943	5.69062e-05	9.89784e-05	9.2232e-06	7.70617e-05	3.9901e-06	9.20944e-05	7.84466e-06	1.7328e-06						19.8171	4.40304	6.86466	5.00926e-05	7.22804	2.29875e-05	1.20613	1.86774e-05	1.99027e-06					1	0	0	19.8168	4.40298	6.86456	4.08694e-05	7.22797	1.89974e-05	1.20604	1.08327e-05	2.57471e-07	0	0	0
Lab 1	Jun 21, 2022	3	Zr_060	iRM_UR			0.000253648	4.14986e-05	8.97072e-05	9.91057e-06	8.15095e-05	6.11957e-07	9.1921e-05	3.04506e-06	-2.72597e-06						21.1415	4.69731	7.32348	3.88889e-05	7.71102	2.29323e-05	1.2867	1.0321e-05	-3.63217e-06					1	0	0	21.1413	4.69727	7.32339	2.89784e-05	7.71093	2.23203e-05	1.28661	7.27592e-06	-9.06205e-07	0	0	0
Lab 1	Jun 21, 2022	3	Zr_065	iRM_12			0.000267008	5.71949e-05	9.31835e-05	1.92635e-06	8.22577e-05	-1.42537e-06	9.97492e-05	8.06072e-06	-2.22321e-06						19.9094	4.42361	6.89685	5.05327e-05	7.2621	2.45977e-05	1.21183	1.19914e-05	-1.07876e-06					1	0	0	19.9091	4.42355	6.89675	4.86063e-05	7.26201	2.6023e-05	1.21173	3.93069e-06	1.14445e-06	0	0	0
Lab 1	Jun 21, 2022	3	Zr_070	SRM			0.000247731	5.57485e-05	8.2301e-05	1.6127e-05	7.77921e-05	-9.99295e-08	9.90377e-05	1.5375e-05	-2.18986e-06						20.5306	4.56167	7.11211	5.28813e-05	7.48894	2.65647e-05	1.24969	1.28367e-05	-1.89995e-07					1	0	0	20.5303	4.56161	7.11203	3.67543e-05	7.48886	2.66647e-05	1.24959	-2.53829e-06	1.99987e-06	0	0	0
Lab 1	Jun 21, 2022	3	Zr_075	iRM_12			0.000267616	5.12455e-05	9.18196e-05	1.53795e-05	8.89954e-05	1.83621e-05	0.000101498	1.38873e-05	-6.49231e-07						19.8816	4.41749	6.88739	4.82301e-05	7.25232	3.75301e-05	1.21026	1.32276e-05	1.29973e-06					1	0	0	19.8813	4.41744	6.8873	3.28506e-05	7.25223	1.91681e-05	1.21016	-6.59704e-07	1.94896e-06	0	0	0
Lab 1	Jun 21, 2022	3	Zr_080	alfaA			0.000268704	5.3433e-05	9.60117e-05	1.7775e-05	7.86453e-05	3.79301e-06	9.80991e-05	2.46978e-06	-2.70448e-06						20.3547	4.522	7.04945	3.86124e-05	7.42109	2.38876e-05	1.23813	1.2135e-05	-2.52473e-07					1	0	0	20.3544	4.52195	7.04936	2.08374e-05	7.42101	2.00946e-05	1.23803	9.66527e-06	2.45201e-06	0	0	0
Lab 1	Jun 21, 2022	3	Zr_085	iRM_12			0.000267091	4.86831e-05	9.42972e-05	9.11509e-06	7.89205e-05	2.93165e-06	0.000101886	9.56573e-06	-1.59355e-06						19.8595	4.41265	6.87992	4.93854e-05	7.24471	2.42528e-05	1.209	1.30096e-05	2.28403e-06					1	0	0	19.8592	4.4126	6.87983	4.02703e-05	7.24463	2.13211e-05	1.2089	3.44387e-06	3.87759e-06	0	0	0
Lab 1	Jun 21, 2022	3	Zr_090	Ames			0.000264757	5.23229e-05	9.09063e-05	1.38937e-05	7.0324e-05	-2.24979e-08	0.000107792	7.95202e-06	-6.92486e-06						20.9632	4.65823	7.26342	4.55898e-05	7.64961	3.23483e-05	1.27677	1.57033e-05	8.95065e-06					1	0	0	20.9629	4.65818	7.26333	3.1696e-05	7.64954	3.23708e-05	1.27666	7.75128e-06	1.58755e-05	0	0	0
Lab 1	Jun 21, 2022	3	Zr_095	iRM_12			0.000258292	4.87247e-05	8.7486e-05	1.31493e-05	8.06355e-05	3.41863e-06	9.21751e-05	2.78735e-06	6.64911e-07						19.8806	4.41734	6.88734	5.32508e-05	7.25262	2.31636e-05	1.21034	1.32941e-05	2.74488e-07					1	0	0	19.8803	4.41729	6.88725	4.01014e-05	7.25254	1.9745e-05	1.21025	1.05067e-05	-3.90422e-07	0	0	0
Lab 1	Jun 21, 2022	3	Zr_100	IPGP			0.000245516	5.26711e-05	8.08516e-05	6.59685e-06	7.64631e-05	2.29188e-06	8.9488e-05	1.05076e-05	-9.21468e-06						21.0683	4.68124	7.29864	4.10648e-05	7.6855	2.49442e-05	1.28254	1.65524e-05	5.22107e-07					1	0	0	21.068	4.68119	7.29856	3.4468e-05	7.68542	2.26523e-05	1.28245	6.04477e-06	9.73678e-06	0	0	0
Lab 1	Jun 21, 2022	3	Zr_105	iRM_12			0.0002677	4.83288e-05	9.81005e-05	1.30142e-05	6.36733e-05	-3.54822e-06	9.99314e-05	1.12543e-05	-4.01677e-06						20.0227	4.44907	6.9369	5.52647e-05	7.30499	2.51061e-05	1.21915	1.84677e-05	-3.66867e-07					1	0	0	20.0224	4.44903	6.9368	4.22504e-05	7.30493	2.86543e-05	1.21905	7.21339e-06	3.64991e-06	0	0	0
Lab 1	Jun 21, 2022	3	Zr_110	iRM_UR			0.000251347	4.43944e-05	9.22232e-05	9.46934e-06	8.94564e-05	1.88744e-06	9.35111e-05	2.90477e-06	-2.16938e-06						21.3318	4.73986	7.39024	3.86347e-05	7.78224	2.4145e-05	1.29877	8.31396e-06	-5.75523e-06					1	0	0	21.3315	4.73981	7.39014	2.91654e-05	7.78215	2.22576e-05	1.29867	5.40919e-06	-3.58586e-06	0	0	0
Lab 1	Jun 21, 2022	3	Zr_115	iRM_12			0.0002814	6.12335e-05	0.000105875	7.62945e-06	8.96719e-05	1.3064e-06	8.40989e-05	8.69606e-06	-4.99537e-06						20.0106	4.4464	6.93285	5.63983e-05	7.301	2.46795e-05	1.21852	1.19745e-05	-6.66324e-07					1	0	0	20.0103	4.44634	6.93275	4.87689e-05	7.30091	2.33731e-05	1.21843	3.27847e-06	4.32904e-06	0	0	0
Lab 1	Jun 21, 2022	3	Zr_120	SRM			0.00179758	0.000395699	0.00062088	1.76008e-05	0.000636181	6.17152e-06	0.000187038	1.05425e-06	-3.76601e-06						20.5506	4.56637	7.11984	4.86206e-05	7.49784	2.80569e-05	1.25133	1.4885e-05	2.59692e-08					1	0	0	20.5488	4.56597	7.11922	3.10198e-05	7.49721	2.18854e-05	1.25114	1.38307e-05	3.79198e-06	0	0	0
Lab 1	Jun 21, 2022	3	Zr_125	iRM_12			0.000314462	6.42892e-05	0.000102667	1.01987e-05	9.22524e-05	5.29892e-06	9.79886e-05	5.50516e-06	-4.75632e-06						20.0757	4.46091	6.95554	5.40811e-05	7.325	2.45991e-05	1.22254	1.28413e-05	-1.96775e-06					1	0	0	20.0754	4.46084	6.95543	4.38824e-05	7.3249	1.93002e-05	1.22244	7.33617e-06	2.78857e-06	0	0	0
Lab 1	Jun 21, 2022	3	Zr_130	alfaA			0.000272911	6.51116e-05	8.7866e-05	2.44145e-05	9.28327e-05	3.03325e-06	0.000104783	-6.0992e-06	-4.96217e-06						20.6278	4.58296	7.14491	4.25754e-05	7.52257	2.64198e-05	1.25519	1.47835e-05	-2.44151e-06					1	0	0	20.6276	4.58289	7.14482	1.81609e-05	7.52248	2.33866e-05	1.25509	2.08827e-05	2.52067e-06	0	0	0
Lab 1	Jun 21, 2022	3	Zr_135	iRM_12			0.00122379	0.000265066	0.000430895	1.4137e-05	0.000434608	2.0905e-06	0.000157469	8.05133e-06	-6.61524e-06						19.9831	4.44036	6.92351	5.10828e-05	7.29132	2.31929e-05	1.21691	1.19824e-05	2.92742e-07					1	0	0	19.9819	4.4401	6.92308	3.69458e-05	7.29089	2.11024e-05	1.21675	3.93109e-06	6.90798e-06	0	0	0
Lab 1	Jun 21, 2022	3	Zr_140	Ames			0.00026936	6.60135e-05	9.47714e-05	1.8075e-05	7.34338e-05	1.32707e-06	9.12215e-05	-2.11385e-07	-3.74122e-06						21.1361	4.69698	7.32434	4.72594e-05	7.71482	3.23628e-05	1.28782	2.02749e-05	7.65512e-06					1	0	0	21.1358	4.69691	7.32425	2.91844e-05	7.71475	3.10357e-05	1.28773	2.04863e-05	1.13963e-05	0	0	0
Lab 1	Jun 21, 2022	3	Zr_145	iRM_12			0.000256506	5.49211e-05	8.75832e-05	1.45692e-05	7.33171e-05	-2.42218e-06	9.4907e-05	6.56972e-06	-5.00235e-06						19.8955	4.42094	6.89333	5.5387e-05	7.25987	2.38377e-05	1.2117	1.37705e-05	-8.26099e-07					1	0	0	19.8952	4.42089	6.89324	4.08178e-05	7.2598	2.62598e-05	1.2116	7.20073e-06	4.17625e-06	0	0	0
Lab 1	Jun 21, 2022	3	Zr_150	IPGP			0.000753681	0.00017053	0.00025824	2.25835e-05	0.000252073	3.01108e-06	0.000132086	1.24719e-05	-2.02767e-06						21.0768	4.68342	7.30252	3.71008e-05	7.69057	2.52986e-05	1.28356	1.86758e-05	4.74343e-07					1	0	0	21.0761	4.68325	7.30227	1.45173e-05	7.69031	2.22876e-05	1.28343	6.20389e-06	2.50201e-06	0	0	0
Lab 1	Jun 21, 2022	3	Zr_155	iRM_12			0.000263974	6.14241e-05	9.82625e-05	1.36836e-05	7.8609e-05	4.03926e-06	9.49787e-05	1.96697e-05	-7.93261e-06						19.9546	4.43419	6.91409	5.14807e-05	7.28185	2.44462e-05	1.21542	9.85422e-06	3.77079e-08					1	0	0	19.9544	4.43413	6.91399	3.77971e-05	7.28177	2.04069e-05	1.21533	-9.81545e-06	7.97032e-06	0	0	0
Lab 1	Jun 21, 2022	3	Zr_160	iRM_UR			0.000252548	5.36294e-05	8.17118e-05	1.14204e-05	7.01715e-05	1.2251e-06	9.82725e-05	1.30748e-05	-4.21398e-06						21.1819	4.70686	7.33913	4.17146e-05	7.72937	2.40314e-05	1.29008	1.96192e-05	-3.37792e-06					1	0	0	21.1817	4.70681	7.33905	3.02942e-05	7.7293	2.28063e-05	1.28998	6.5444e-06	8.36056e-07	0	0	0
Lab 1	Jun 21, 2022	3	Zr_165	iRM_12			0.000273781	7.03081e-05	0.000100979	1.85373e-05	8.38323e-05	1.84156e-06	0.000102158	4.08953e-06	-5.92543e-06						19.9455	4.43217	6.91108	5.6919e-05	7.2789	2.55328e-05	1.21495	1.19719e-05	-2.31903e-08					1	0	0	19.9452	4.4321	6.91098	3.83817e-05	7.27881	2.36913e-05	1.21484	7.8824e-06	5.90224e-06	0	0	0
Lab 1	Jun 21, 2022	3	Zr_170	SRM			0.000458367	0.000106305	0.000156029	2.07855e-05	0.000145808	-4.62946e-06	0.000119223	1.19083e-05	-4.58367e-06						20.2851	4.50761	7.02863	5.23395e-05	7.40256	2.47229e-05	1.23558	1.50307e-05	8.13175e-08					1	0	0	20.2846	4.5075	7.02847	3.1554e-05	7.40241	2.93524e-05	1.23547	3.12235e-06	4.66499e-06	0	0	0
Lab 1	Jun 21, 2022	3	Zr_175	iRM_12			0.000281707	6.70045e-05	9.0049e-05	1.95309e-05	9.04949e-05	4.29635e-06	0.000101016	6.98384e-06	-3.24695e-06						19.7219	4.38251	6.83362	5.02017e-05	7.19735	2.17269e-05	1.20133	1.49277e-05	9.89766e-08					1	0	0	19.7216	4.38245	6.83353	3.06708e-05	7.19726	1.74306e-05	1.20123	7.94382e-06	3.34593e-06	0	0	0
Lab 1	Jun 21, 2022	3	Zr_180	alfaA			0.000256003	5.08884e-05	9.41292e-05	1.13453e-05	6.99319e-05	2.20503e-06	9.32959e-05	8.92984e-06	-3.37376e-06						20.4557	4.54498	7.08606	4.17296e-05	7.46136	2.22687e-05	1.24512	1.22741e-05	-1.49666e-06					1	0	0	20.4555	4.54493	7.08597	3.03843e-05	7.46129	2.00637e-05	1.24502	3.34429e-06	1.87709e-06	0	0	0
Lab 1	Jun 21, 2022	3	Zr_185	iRM_12			0.000347944	7.20892e-05	0.000122198	1.2351e-05	9.60547e-05	2.42443e-07	0.000102499	2.41033e-06	-1.85551e-06						19.673	4.37168	6.81683	5.40706e-05	7.1798	2.50836e-05	1.19844	2.14637e-05	1.80383e-06					1	0	0	19.6726	4.37161	6.8167	4.17196e-05	7.1797	2.48412e-05	1.19834	1.90533e-05	3.65933e-06	0	0	0
Lab 1	Jun 21, 2022	3	Zr_190	Ames			0.00026663	1.54398e-05	9.93909e-05	8.57788e-06	7.85792e-05	-6.65709e-07	7.38859e-05	9.27781e-06	-4.21406e-06						21.1027	4.68981	7.31351	3.86488e-05	7.70421	3.1937e-05	1.28619	1.85781e-05	8.18452e-06					1	0	0	21.1024	4.68979	7.31341	3.0071e-05	7.70413	3.26027e-05	1.28611	9.30033e-06	1.23986e-05	0	0	0
Lab 1	Jun 21, 2022	3	Zr_195	iRM_12			0.000386101	8.73182e-05	0.000135412	1.74088e-05	0.000115638	-1.51994e-06	9.50057e-05	1.65775e-05	-1.76015e-06						19.6919	4.37593	6.82354	5.19913e-05	7.18711	2.25776e-05	1.19968	1.86617e-05	-1.36567e-06					1	0	0	19.6915	4.37584	6.8234	3.45825e-05	7.18699	2.40976e-05	1.19959	2.08412e-06	3.94486e-07	0	0	0
Lab 1	Jun 21, 2022	3	Zr_200	IPGP			0.0002536	5.87307e-05	9.32425e-05	9.84155e-06	7.55231e-05	2.3219e-06	9.88583e-05	8.07491e-06	-5.22638e-06						20.8987	4.64407	7.24154	3.99055e-05	7.62707	2.5678e-05	1.27308	1.45256e-05	-5.10338e-07					1	0	0	20.8985	4.64402	7.24144	3.00639e-05	7.62699	2.33561e-05	1.27299	6.45074e-06	4.71604e-06	0	0	0
Lab 1	Jun 21, 2022	3	Zr_205	iRM_12			0.000250023	6.41117e-05	9.63299e-05	1.22669e-05	8.79208e-05	2.02022e-06	0.000100861	1.3561e-05	-4.63487e-06						19.5492	4.34435	6.77437	5.17582e-05	7.13547	2.46842e-05	1.1911	1.7429e-05	-2.45992e-08					1	0	0	19.549	4.34428	6.77428	3.94913e-05	7.13538	2.26639e-05	1.191	3.86795e-06	4.61027e-06	0	0	0
Lab 1	Jun 21, 2022	3	Zr_210	iRM_UR			0.000265667	6.08318e-05	9.89255e-05	6.93899e-06	6.9082e-05	-2.87215e-06	8.6804e-05	1.13561e-05	-2.5403e-06						20.923	4.64948	7.25015	3.5881e-05	7.63646	2.4684e-05	1.27468	1.52855e-05	-4.17723e-06					1	0	0	20.9227	4.64942	7.25005	2.8942e-05	7.63639	2.75561e-05	1.27459	3.92943e-06	-1.63693e-06	0	0	0
Lab 1	Jun 21, 2022	3	Zr_215	iRM_12			0.000268504	6.09479e-05	8.87675e-05	1.18105e-05	7.2506e-05	-2.50583e-07	9.23544e-05	9.13992e-06	-1.20676e-06						19.6291	4.36207	6.80215	4.92734e-05	7.16484	2.35801e-05	1.19604	1.8551e-05	-2.39037e-07					1	0	0	19.6289	4.36201	6.80206	3.74629e-05	7.16476	2.38307e-05	1.19595	9.41109e-06	9.67726e-07	0	0	0
Lab 1	Jun 21, 2022	3	Zr_220	SRM			0.00168624	0.000381738	0.00058742	6.20955e-06	0.000600023	1.48288e-05	0.000180305	1.1956e-05	-4.60588e-06						20.4275	4.53952	7.07877	5.24059e-05	7.45622	3.95636e-05	1.24466	1.53365e-05	-2.36837e-07					1	0	0	20.4258	4.53914	7.07819	4.61963e-05	7.45562	2.47348e-05	1.24448	3.38045e-06	4.36905e-06	0	0	0
Lab 1	Jun 21, 2022	3	Zr_225	iRM_12			0.000268278	5.86026e-05	9.08032e-05	1.29962e-05	8.65024e-05	1.23968e-06	9.36785e-05	1.6182e-05	-4.0779e-06						19.6963	4.37704	6.82547	5.32166e-05	7.18948	2.47963e-05	1.20012	1.7304e-05	-1.40388e-06					1	0	0	19.696	4.37699	6.82538	4.02204e-05	7.1894	2.35566e-05	1.20003	1.12204e-06	2.67402e-06	0	0	0
Lab 1	Jun 21, 2022	3	Zr_230	alfaA			0.000264263	5.61353e-05	9.39023e-05	9.79354e-06	6.81181e-05	1.31801e-06	9.352e-05	1.7663e-05	-4.70226e-06						20.4173	4.53669	7.07347	3.91601e-05	7.44887	2.74953e-05	1.24315	1.94579e-05	9.40106e-08					1	0	0	20.417	4.53663	7.07337	2.93665e-05	7.4488	2.61773e-05	1.24306	1.7949e-06	4.79627e-06	0	0	0
Lab 1	Jun 21, 2022	3	Zr_235	iRM_12			0.00041174	9.48285e-05	0.000138237	9.4064e-06	0.00013754	1.40014e-06	9.95459e-05	1.43376e-05	-8.80194e-06						19.6251	4.36126	6.80091	5.1186e-05	7.16378	2.44608e-05	1.19588	2.07151e-05	-5.72381e-07					1	0	0	19.6247	4.36117	6.80077	4.17796e-05	7.16365	2.30606e-05	1.19578	6.3775e-06	8.22955e-06	0	0	0
Lab 1	Jun 21, 2022	3	Zr_240	Ames			0.000257875	6.35997e-05	9.41499e-05	1.0718e-05	7.10993e-05	3.85621e-06	9.37951e-05	1.08675e-05	-5.51398e-06						21.0259	4.6729	7.28756	4.35861e-05	7.67762	3.1911e-05	1.28186	2.37082e-05	8.63154e-06					1	0	0	21.0256	4.67284	7.28747	3.2868e-05	7.67755	2.80548e-05	1.28176	1.28407e-05	1.41455e-05	0	0	0
Lab 1	Jun 21, 2022	3	Zr_245	iRM_12			0.000264933	5.68051e-05	8.68585e-05	2.79986e-05	6.82887e-05	2.78108e-06	9.65599e-05	1.05105e-05	-4.76728e-06						19.5568	4.34615	6.77747	4.92263e-05	7.13932	2.45142e-05	1.19183	2.2886e-05	-3.71909e-07					1	0	0	19.5566	4.34609	6.77738	2.12277e-05	7.13925	2.17331e-05	1.19173	1.23755e-05	4.39537e-06	0	0	0
Lab 1	Jun 21, 2022	3	Zr_250	IPGP			0.000249534	5.09092e-05	8.50055e-05	9.20216e-06	6.60707e-05	1.78583e-06	0.000102451	2.22247e-05	-4.94313e-06						20.9124	4.64735	7.24694	3.53733e-05	7.63361	2.6107e-05	1.2743	2.34036e-05	9.12282e-07					1	0	0	20.9122	4.6473	7.24686	2.61711e-05	7.63354	2.43211e-05	1.2742	1.1789e-06	5.85541e-06	0	0	0
Lab 1	Jun 21, 2022	3	Zr_255	iRM_12			0.000286396	5.90045e-05	0.000104567	2.05334e-05	7.92467e-05	-3.10792e-07	9.68319e-05	1.43975e-05	-6.05702e-06						19.5968	4.35507	6.79143	5.252e-05	7.15414	2.25518e-05	1.19432	2.31238e-05	6.86844e-07					1	0	0	19.5965	4.35501	6.79133	3.19865e-05	7.15406	2.28626e-05	1.19422	8.72637e-06	6.74386e-06	0	0	0
Lab 1	Jun 21, 2022	3	Zr_260	iRM_UR			0.0049635	0.00109899	0.00172528	1.42179e-05	0.00179349	1.04968e-06	0.000382944	1.73332e-05	-1.69285e-06						20.8576	4.63527	7.22834	3.40548e-05	7.61438	2.29405e-05	1.27114	1.42485e-05	-4.04072e-06					1	0	0	20.8527	4.63417	7.22661	1.98369e-05	7.61258	2.18909e-05	1.27076	-3.08475e-06	-2.34786e-06	0	0	0
Lab 1	Jun 21, 2022	3	Zr_265	iRM_12			0.000271512	6.70491e-05	9.33868e-05	9.4334e-06	8.59902e-05	-4.8554e-07	8.5991e-05	1.61669e-05	1.61623e-07						19.655	4.368	6.81163	4.92364e-05	7.17548	2.31594e-05	1.1979	1.94309e-05	-7.82976e-07					1	0	0	19.6548	4.36794	6.81153	3.9803e-05	7.17539	2.3645e-05	1.19781	3.26392e-06	-9.44598e-07	0	0	0
Lab 1	Jun 21, 2022	3	Zr_270	SRM			0.00027133	6.22068e-05	8.29403e-05	1.29093e-05	8.11981e-05	8.80265e-07	8.09396e-05	1.54831e-05	-2.99642e-06						20.6314	4.58504	7.15006	5.48225e-05	7.5321	2.56933e-05	1.25746	1.86797e-05	-5.74688e-07					1	0	0	20.6311	4.58498	7.14998	4.19131e-05	7.53202	2.4813e-05	1.25738	3.19665e-06	2.42173e-06	0	0	0
Lab 1	Jun 21, 2022	3	Zr_275	iRM_12			0.000266394	6.07038e-05	0.00010533	2.48679e-05	7.36225e-05	5.70856e-06	8.71088e-05	2.30496e-05	-2.71108e-06						19.4505	4.32263	6.74095	5.26337e-05	7.10113	2.11695e-05	1.1855	2.17582e-05	1.00195e-06					1	0	0	19.4502	4.32257	6.74084	2.77658e-05	7.10105	1.54609e-05	1.18541	-1.29144e-06	3.71304e-06	0	0	0
Lab 1	Jun 21, 2022	3	Zr_280	alfaA			0.00307378	0.000676146	0.00107141	6.41365e-06	0.00111477	1.01491e-07	0.00025844	1.03544e-05	-1.90922e-06						20.4532	4.54483	7.08646	4.22483e-05	7.4632	2.42931e-05	1.24564	2.04788e-05	4.99537e-07					1	0	0	20.4501	4.54415	7.08539	3.58346e-05	7.46209	2.41916e-05	1.24538	1.01244e-05	2.40876e-06	0	0	0
Lab 1	Jun 21, 2022	3	Zr_285	iRM_12			0.000272779	5.99776e-05	9.14838e-05	1.87325e-05	7.23204e-05	-2.59606e-06	8.93923e-05	9.28387e-06	-2.51818e-06						19.4406	4.32054	6.73775	5.24608e-05	7.09811	2.36598e-05	1.18505	2.12767e-05	2.19148e-08					1	0	0	19.4404	4.32048	6.73766	3.37283e-05	7.09803	2.62559e-05	1.18496	1.19928e-05	2.5401e-06	0	0	0
Lab 1	Jun 21, 2022	3	Zr_290	Ames			0.000251943	5.25282e-05	8.4154e-05	1.62862e-05	7.71634e-05	1.86719e-07	8.61674e-05	1.40104e-05	-5.58576e-06						20.9624	4.65902	7.26623	4.5942e-05	7.65588	2.89662e-05	1.27832	2.1529e-05	1.00102e-05					1	0	0	20.9621	4.65897	7.26614	2.96558e-05	7.6558	2.87794e-05	1.27823	7.51858e-06	1.5596e-05	0	0	0
Lab 1	Jun 21, 2022	3	Zr_295	iRM_12			0.000252348	4.90521e-05	9.91934e-05	1.51815e-05	6.54244e-05	-9.75463e-07	9.62342e-05	9.41294e-06	-8.01436e-07						19.5153	4.3371	6.76366	5.32233e-05	7.12526	2.33454e-05	1.18958	1.54044e-05	5.12213e-07					1	0	0	19.5151	4.33706	6.76356	3.80418e-05	7.1252	2.43209e-05	1.18949	5.99141e-06	1.31365e-06	0	0	0
Lab 1	Jun 21, 2022	3	Zr_300	IPGP			0.000248682	5.75611e-05	9.39466e-05	1.29123e-05	6.58642e-05	-2.279e-06	8.07483e-05	7.90428e-06	4.40165e-08						20.8631	4.63658	7.23051	3.87681e-05	7.61694	2.66214e-05	1.27163	1.87531e-05	2.44431e-06					1	0	0	20.8629	4.63653	7.23042	2.58558e-05	7.61688	2.89004e-05	1.27155	1.08488e-05	2.40029e-06	0	0	0
Lab 1	Jun 21, 2022	3	Zr_305	iRM_12			0.00113854	0.00023801	0.000397134	1.13813e-05	0.000392795	1.07616e-06	0.000129571	1.94958e-05	-3.02017e-06						19.435	4.31925	6.73586	5.31754e-05	7.09618	2.32053e-05	1.18473	2.02215e-05	6.71064e-07					1	0	0	19.4338	4.31901	6.73546	4.17941e-05	7.09579	2.21291e-05	1.1846	7.25697e-07	3.69123e-06	0	0	0
Lab 1	Jun 22, 2022	4	Zr_004	iRM_12			9.75846e-05	2.774e-05	3.99181e-05	1.2252e-05	3.30993e-05	4.68964e-06	7.77476e-05	1.10836e-05	-5.8377e-06						20.0824	4.4631	6.96002	5.53811e-05	7.33194	2.61961e-05	1.22403	1.49473e-05	1.32223e-06					1	0	0	20.0823	4.46307	6.95998	4.31291e-05	7.33191	2.15065e-05	1.22395	3.86361e-06	7.15993e-06	0	0	0
Lab 1	Jun 22, 2022	4	Zr_008	iRM_UR			0.000198184	3.79361e-05	7.74401e-05	2.15451e-05	6.44456e-05	3.04639e-06	6.5027e-05	5.99669e-06	-3.17699e-06						21.123	4.69446	7.32095	3.92957e-05	7.71254	2.62391e-05	1.28765	1.4086e-05	-3.06332e-06					1	0	0	21.1228	4.69442	7.32088	1.77506e-05	7.71248	2.31927e-05	1.28759	8.08927e-06	1.13678e-07	0	0	0
Lab 1	Jun 22, 2022	4	Zr_012	iRM_12			0.0002315	3.74006e-05	8.33233e-05	1.59679e-05	6.72201e-05	4.22532e-06	7.53057e-05	1.61513e-05	-5.38737e-06						19.6124	4.35881	6.79773	5.17324e-05	7.16177	2.56991e-05	1.19576	1.12499e-05	9.02394e-07					1	0	0	19.6121	4.35877	6.79764	3.57644e-05	7.16171	2.14738e-05	1.19569	-4.90137e-06	6.28976e-06	0	0	0
Lab 1	Jun 22, 2022	4	Zr_016	SRM			0.000293204	5.58022e-05	0.000100357	1.07e-05	8.73468e-05	1.59852e-06	7.49619e-05	1.84729e-05	-4.88966e-06						20.8355	4.63069	7.22178	5.2538e-05	7.60853	2.83183e-05	1.27036	1.89337e-05	2.74261e-06					1	0	0	20.8352	4.63064	7.22168	4.1838e-05	7.60844	2.67198e-05	1.27029	4.60789e-07	7.63227e-06	0	0	0
Lab 1	Jun 22, 2022	4	Zr_020	iRM_12			0.00178936	0.000402108	0.000621258	1.89246e-05	0.000635019	3.49094e-06	0.000159257	2.03265e-05	-2.62249e-06						19.5274	4.34001	6.76865	5.12453e-05	7.13154	2.66909e-05	1.19079	1.98929e-05	1.47108e-06					1	0	0	19.5256	4.33961	6.76803	3.23207e-05	7.13091	2.31999e-05	1.19063	-4.33585e-07	4.09357e-06	0	0	0
Lab 1	Jun 22, 2022	4	Zr_024	alfaA			0.000247081	4.9942e-05	8.76981e-05	1.01477e-05	6.37841e-05	3.69059e-06	7.32165e-05	1.61695e-05	-2.6174e-06						20.6982	4.59961	7.17246	4.1922e-05	7.55498	2.78391e-05	1.26116	2.2018e-05	-1.18222e-06					1	0	0	20.698	4.59956	7.17237	3.17743e-05	7.55492	2.41485e-05	1.26109	5.84853e-06	1.43518e-06	0	0	0
Lab 1	Jun 22, 2022	4	Zr_028	iRM_12			0.000259452	4.63556e-05	8.71913e-05	1.12643e-05	6.65707e-05	-7.42604e-07	7.11212e-05	9.90489e-06	-6.20698e-06						19.3825	4.30791	6.71866	4.99655e-05	7.07896	2.56276e-05	1.18202	1.70751e-05	4.71928e-07					1	0	0	19.3823	4.30787	6.71858	3.87012e-05	7.0789	2.63702e-05	1.18195	7.17021e-06	6.67891e-06	0	0	0
Lab 1	Jun 22, 2022	4	Zr_032	Ames			0.000415502	8.24429e-05	0.000143765	1.10992e-05	0.000125823	8.00924e-07	7.84202e-05	1.8935e-05	-2.62908e-06						21.0474	4.67835	7.29689	3.96057e-05	7.68935	3.31395e-05	1.28412	1.54103e-05	6.9912e-06					1	0	0	21.047	4.67826	7.29674	2.85065e-05	7.68922	3.23386e-05	1.28404	-3.52473e-06	9.62029e-06	0	0	0
Lab 1	Jun 22, 2022	4	Zr_036	iRM_12			0.000245984	5.26741e-05	7.42143e-05	7.33518e-06	6.48557e-05	5.02466e-07	7.38322e-05	-2.44191e-07	-5.35438e-07						19.2542	4.27944	6.6743	5.32414e-05	7.03249	2.39759e-05	1.1743	1.59556e-05	-4.56289e-07					1	0	0	19.254	4.27938	6.67422	4.59062e-05	7.03243	2.34734e-05	1.17423	1.61998e-05	7.91491e-08	0	0	0
Lab 1	Jun 22, 2022	4	Zr_040	IPGP			0.000245465	4.29153e-05	7.38845e-05	1.33626e-05	7.53674e-05	4.06165e-06	6.27852e-05	4.87512e-06	-5.32148e-06						20.8287	4.62934	7.21984	3.74908e-05	7.60699	2.65073e-05	1.27017	2.19975e-05	9.81728e-07					1	0	0	20.8284	4.6293	7.21976	2.41283e-05	7.60691	2.24456e-05	1.27011	1.71224e-05	6.30321e-06	0	0	0
Lab 1	Jun 22, 2022	4	Zr_044	iRM_12			0.00262782	0.000577877	0.000907484	3.28003e-06	0.000937153	2.27369e-06	0.000207315	1.25858e-05	-1.58298e-06						19.264	4.28167	6.67781	4.7327e-05	7.03624	2.40402e-05	1.17493	1.81114e-05	1.06664e-07					1	0	0	19.2613	4.28109	6.6769	4.4047e-05	7.0353	2.17665e-05	1.17472	5.52559e-06	1.68964e-06	0	0	0
Lab 1	Jun 22, 2022	4	Zr_048	iRM_UR			0.000245299	6.3332e-05	8.15115e-05	5.81036e-06	7.97643e-05	2.94206e-06	5.69181e-05	1.21508e-05	-1.75113e-06						20.5098	4.55851	7.10957	3.60125e-05	7.49111	2.31627e-05	1.25087	1.39912e-05	-2.6928e-06					1	0	0	20.5095	4.55845	7.10949	3.02021e-05	7.49103	2.02206e-05	1.25081	1.84035e-06	-9.41671e-07	0	0	0
Lab 1	Jun 22, 2022	4	Zr_052	iRM_12			0.000783661	0.000174458	0.000266283	5.54503e-07	0.000257764	3.39458e-06	9.58326e-05	1.11794e-05	-1.87583e-06						19.081	4.24098	6.61454	4.74624e-05	6.96969	2.36465e-05	1.16383	1.04437e-05	2.00149e-06					1	0	0	19.0802	4.2408	6.61427	4.69079e-05	6.96944	2.02519e-05	1.16374	-7.35651e-07	3.87732e-06	0	0	0
Lab 1	Jun 22, 2022	4	Zr_056	SRM			0.000418523	9.7347e-05	0.000146266	1.31193e-05	0.000132361	-1.97272e-07	7.66536e-05	1.94658e-05	-2.25504e-06						20.2219	4.49455	7.00988	4.87499e-05	7.38618	2.5791e-05	1.23337	1.94201e-05	-1.0609e-07					1	0	0	20.2215	4.49445	7.00974	3.56305e-05	7.38605	2.59883e-05	1.23329	-4.56215e-08	2.14895e-06	0	0	0
Lab 1	Jun 22, 2022	4	Zr_060	iRM_12			0.000265768	7.92874e-05	8.26222e-05	1.35965e-05	8.31676e-05	1.92811e-07	7.55238e-05	1.17942e-05	-1.30485e-06						19.0454	4.23314	6.60223	4.92686e-05	6.95676	2.32378e-05	1.16171	1.28495e-05	1.42055e-06					1	0	0	19.0451	4.23306	6.60214	3.56721e-05	6.95667	2.3045e-05	1.16163	1.05528e-06	2.7254e-06	0	0	0
Lab 1	Jun 22, 2022	4	Zr_064	alfaA			0.000583568	0.000141371	0.000192013	9.5775e-06	0.000190293	3.30954e-06	7.39166e-05	1.20015e-05	-7.85311e-06						20.2888	4.50887	7.03127	3.81736e-05	7.40694	2.51564e-05	1.23655	2.08747e-05	-1.47827e-06					1	0	0	20.2882	4.50873	7.03108	2.85961e-05	7.40675	2.18468e-05	1.23648	8.87322e-06	6.37484e-06	0	0	0
Lab 1	Jun 22, 2022	4	Zr_068	iRM_12			0.000865976	0.000189413	0.000288759	1.20777e-05	0.000295703	1.70507e-06	9.74269e-05	1.03127e-05	-2.78905e-06						19.0303	4.22978	6.59711	4.72222e-05	6.95162	2.2887e-05	1.16086	2.03354e-05	-9.52316e-07					1	0	0	19.0294	4.22959	6.59682	3.51445e-05	6.95132	2.11819e-05	1.16077	1.00227e-05	1.83673e-06	0	0	0
Lab 1	Jun 22, 2022	4	Zr_072	Ames			0.000261189	5.27366e-05	9.49216e-05	1.616e-05	8.90582e-05	2.01183e-06	7.1958e-05	1.46462e-05	-8.59885e-07						20.687	4.59839	7.17259	3.75122e-05	7.55908	3.05265e-05	1.26248	1.53786e-05	7.27371e-06					1	0	0	20.6868	4.59834	7.17249	2.13522e-05	7.55899	2.85146e-05	1.26241	7.32366e-07	8.13359e-06	0	0	0
Lab 1	Jun 22, 2022	4	Zr_076	iRM_12			0.00221779	0.000488743	0.000764627	1.28882e-05	0.000782156	1.21307e-05	0.0001835	-6.38474e-08	-4.03388e-06						18.8867	4.1979	6.54745	4.84688e-05	6.89936	3.5785e-05	1.15216	1.7746e-05	1.51803e-06					1	0	0	18.8845	4.19741	6.54668	3.55806e-05	6.89858	2.36543e-05	1.15197	1.78098e-05	5.55191e-06	0	0	0
Lab 1	Jun 22, 2022	4	Zr_080	IPGP			0.000246139	2.62698e-05	9.22202e-05	4.35758e-06	7.83367e-05	2.62005e-06	5.68555e-05	6.49475e-06	-3.31644e-06						20.6735	4.595	7.1666	3.44396e-05	7.55152	2.45637e-05	1.261	1.48095e-05	2.33169e-06					1	0	0	20.6732	4.59498	7.16651	3.0082e-05	7.55145	2.19437e-05	1.26095	8.31477e-06	5.64813e-06	0	0	0
Lab 1	Jun 22, 2022	4	Zr_084	iRM_12			0.000271241	4.83497e-05	0.000100054	7.45839e-06	8.30121e-05	-2.67967e-06	7.31238e-05	1.09877e-05	-1.08221e-06						19.0542	4.23518	6.60558	4.56077e-05	6.9607	2.30814e-05	1.16241	1.53276e-05	1.54505e-06					1	0	0	19.0539	4.23513	6.60548	3.81493e-05	6.96062	2.57611e-05	1.16234	4.3399e-06	2.62726e-06	0	0	0
Lab 1	Jun 22, 2022	4	Zr_088	iRM_UR			0.00026919	5.007e-05	9.22055e-05	1.66853e-05	7.94979e-05	2.61188e-06	7.37932e-05	1.85268e-05	-2.26825e-06						20.4768	4.55145	7.09895	3.18953e-05	7.48079	2.26122e-05	1.24928	1.4867e-05	-4.54947e-06					1	0	0	20.4765	4.5514	7.09886	1.52099e-05	7.48071	2.00003e-05	1.2492	-3.65979e-06	-2.28122e-06	0	0	0
Lab 1	Jun 22, 2022	4	Zr_092	iRM_12			0.000354819	7.46187e-05	0.000120904	6.20656e-06	0.000109327	2.87863e-07	6.60371e-05	3.78029e-06	-8.59136e-07						19.1471	4.256	6.63826	5.03323e-05	6.99563	2.32703e-05	1.16832	2.08974e-05	4.42678e-07					1	0	0	19.1468	4.25592	6.63814	4.41257e-05	6.99552	2.29825e-05	1.16826	1.71171e-05	1.30181e-06	0	0	0
Lab 1	Jun 22, 2022	4	Zr_096	SRM			0.000243599	5.56294e-05	7.99884e-05	1.28344e-05	7.40804e-05	-4.58758e-07	6.81173e-05	1.35393e-05	-2.45662e-06						20.7549	4.61333	7.19562	4.50547e-05	7.58295	2.52322e-05	1.26639	1.04244e-05	2.41254e-06					1	0	0	20.7546	4.61327	7.19554	3.22203e-05	7.58288	2.56909e-05	1.26633	-3.11491e-06	4.86916e-06	0	0	0
Lab 1	Jun 22, 2022	4	Zr_100	iRM_12			0.000251812	5.08794e-05	9.10566e-05	1.71475e-05	7.89234e-05	4.1864e-07	7.49948e-05	1.08016e-05	4.23908e-07						19.0535	4.23519	6.60579	5.18428e-05	6.96137	2.28227e-05	1.16259	1.85618e-05	1.36315e-06					1	0	0	19.0532	4.23514	6.6057	3.46953e-05	6.96129	2.2404e-05	1.16252	7.76019e-06	9.39242e-07	0	0	0
Lab 1	Jun 22, 2022	4	Zr_104	alfaA			0.000242839	5.37813e-05	8.98281e-05	1.06342e-05	7.83726e-05	1.00498e-06	7.03292e-05	5.56761e-06	-6.82768e-06						20.4316	4.5408	7.08146	4.18746e-05	7.46052	2.51424e-05	1.24563	1.44591e-05	-2.77867e-07					1	0	0	20.4313	4.54074	7.08137	3.12405e-05	7.46044	2.41374e-05	1.24556	8.89146e-06	6.54981e-06	0	0	0
Lab 1	Jun 22, 2022	4	Zr_108	iRM_12			0.000268093	5.49835e-05	9.03111e-05	-1.02128e-06	8.25271e-05	-3.05995e-07	6.25939e-05	5.64299e-06	-4.97774e-06						19.1409	4.25461	6.63609	4.72438e-05	6.99335	2.21001e-05	1.16793	1.46727e-05	1.9697e-07					1	0	0	19.1407	4.25455	6.636	4.8265e-05	6.99327	2.24061e-05	1.16787	9.02969e-06	5.17471e-06	0	0	0
Lab 1	Jun 22, 2022	4	Zr_112	Ames			0.000281904	6.71117e-05	9.39023e-05	1.39479e-05	8.81363e-05	1.5371e-06	6.81741e-05	7.95576e-06	-1.93594e-06						21.0358	4.67627	7.29444	3.89559e-05	7.68846	3.04785e-05	1.28422	2.13683e-05	8.33264e-06					1	0	0	21.0355	4.6762	7.29435	2.5008e-05	7.68837	2.89414e-05	1.28416	1.34125e-05	1.02686e-05	0	0	0
Lab 1	Jun 22, 2022	4	Zr_116	iRM_12			0.000251007	5.45937e-05	7.73165e-05	7.53937e-06	7.41581e-05	9.34615e-07	5.09882e-05	1.79933e-05	-2.10498e-06						18.9548	4.2133	6.57176	4.89004e-05	6.92567	2.23726e-05	1.15665	1.38177e-05	2.31501e-06					1	0	0	18.9546	4.21325	6.57168	4.1361e-05	6.9256	2.1438e-05	1.1566	-4.17563e-06	4.41999e-06	0	0	0
Lab 1	Jun 22, 2022	4	Zr_120	IPGP			0.000249528	5.70849e-05	8.31524e-05	6.35656e-06	7.47957e-05	-1.35131e-06	6.09022e-05	3.74661e-06	-3.77413e-06						20.6499	4.58997	7.15915	3.38571e-05	7.54442	2.46248e-05	1.25994	1.71106e-05	4.60894e-07					1	0	0	20.6497	4.58991	7.15906	2.75005e-05	7.54435	2.59761e-05	1.25988	1.3364e-05	4.23503e-06	0	0	0
Lab 1	Jun 22, 2022	4	Zr_124	iRM_12			0.000271545	6.25312e-05	8.7153e-05	1.29062e-05	8.43231e-05	-3.73349e-06	5.4536e-05	1.1773e-05	-2.17851e-06						19.1227	4.25065	6.63014	4.96356e-05	6.98742	2.14033e-05	1.16699	1.49805e-05	-2.1208e-06					1	0	0	19.1224	4.25058	6.63005	3.67295e-05	6.98734	2.51368e-05	1.16694	3.20752e-06	5.77096e-08	0	0	0
Lab 1	Jun 22, 2022	4	Zr_128	iRM_UR			0.000260847	5.69449e-05	8.36945e-05	2.82567e-05	7.21408e-05	1.62658e-06	6.15956e-05	2.62795e-05	-2.37814e-06						20.3305	4.51917	7.04898	3.12475e-05	7.42876	2.1625e-05	1.24068	1.80189e-05	-3.30315e-06					1	0	0	20.3303	4.51911	7.0489	2.99077e-06	7.42868	1.99984e-05	1.24062	-8.26055e-06	-9.25016e-07	0	0	0
Lab 1	Jun 22, 2022	4	Zr_132	iRM_12			0.000275486	6.10135e-05	8.30818e-05	1.66553e-05	8.08779e-05	1.9663e-07	6.47249e-05	1.16505e-05	-9.35004e-06						18.8773	4.19612	6.54508	5.07465e-05	6.89779	2.24264e-05	1.15205	1.85509e-05	-9.90196e-07					1	0	0	18.877	4.19606	6.545	3.40912e-05	6.8977	2.22298e-05	1.15198	6.90042e-06	8.35984e-06	0	0	0
Lab 1	Jun 22, 2022	4	Zr_136	SRM			0.000267893	4.62397e-05	8.40391e-05	1.72225e-05	7.83097e-05	7.84713e-07	6.43096e-05	9.3644e-06	-1.07843e-06						20.5436	4.56651	7.12286	4.91893e-05	7.50671	2.38822e-05	1.25375	1.64852e-05	-5.36658e-07					1	0	0	20.5433	4.56646	7.12277	3.19668e-05	7.50664	2.30975e-05	1.25369	7.12079e-06	5.41773e-07	0	0	0
Lab 1	Jun 22, 2022	4	Zr_140	iRM_12			0.00197286	0.000415448	0.000684865	1.35666e-05	0.000698339	-3.67972e-06	0.000172145	5.92821e-06	-3.14752e-06						18.9774	4.21842	6.57998	5.02765e-05	6.93489	2.28596e-05	1.15827	1.14174e-05	-5.20114e-07					1	0	0	18.9755	4.21801	6.5793	3.67099e-05	6.9342	2.65394e-05	1.1581	5.48918e-06	2.62741e-06	0	0	0
Lab 1	Jun 22, 2022	4	Zr_144	alfaA			0.000248691	5.5073e-05	8.41777e-05	1.70965e-05	7.57925e-05	-1.48639e-06	6.80367e-05	8.81298e-06	-3.55904e-06						20.3797	4.52952	7.0642	3.37322e-05	7.44304	2.37967e-05	1.24282	1.40295e-05	-1.16251e-06					1	0	0	20.3795	4.52947	7.06412	1.66356e-05	7.44296	2.52831e-05	1.24275	5.2165e-06	2.39653e-06	0	0	0
Lab 1	Jun 22, 2022	4	Zr_148	iRM_12			0.000265148	6.60253e-05	9.41469e-05	7.85447e-06	8.07015e-05	-1.62354e-06	6.83505e-05	3.92652e-06	-5.91797e-06						18.9955	4.22254	6.58637	4.87337e-05	6.94162	2.14672e-05	1.1594	9.6647e-06	-8.66789e-07					1	0	0	18.9952	4.22248	6.58627	4.08792e-05	6.94154	2.30907e-05	1.15933	5.73818e-06	5.05118e-06	0	0	0
Lab 1	Jun 22, 2022	4	Zr_152	Ames			0.000260453	5.23617e-05	9.48333e-05	1.78513e-06	7.98661e-05	3.15159e-06	6.69188e-05	1.22292e-05	-1.81558e-06						20.9067	4.64769	7.25022	3.72673e-05	7.64255	3.05709e-05	1.27668	1.39413e-05	6.94302e-06					1	0	0	20.9064	4.64763	7.25013	3.54821e-05	7.64247	2.74193e-05	1.27661	1.71207e-06	8.7586e-06	0	0	0
Lab 1	Jun 22, 2022	4	Zr_156	iRM_12			0.000249162	5.96533e-05	9.59941e-05	9.90759e-06	7.17068e-05	2.43397e-06	6.26448e-05	1.00546e-05	-5.81969e-06						18.964	4.21555	6.57557	4.5175e-05	6.93038	2.22858e-05	1.15758	1.14509e-05	-5.4273e-07					1	0	0	18.9637	4.21549	6.57548	3.52674e-05	6.93031	1.98519e-05	1.15751	1.3963e-06	5.27696e-06	0	0	0
Lab 1	Jun 22, 2022	4	Zr_160	IPGP			0.00026612	6.10193e-05	9.28685e-05	8.42778e-06	8.22517e-05	-2.28768e-06	6.00475e-05	8.8458e-06	-2.96835e-06						20.8336	4.63103	7.22346	3.19305e-05	7.61287	2.5226e-05	1.27148	1.54035e-05	-4.94122e-07					1	0	0	20.8334	4.63097	7.22337	2.35027e-05	7.61279	2.75137e-05	1.27142	6.5577e-06	2.47423e-06	0	0	0
Lab 1	Jun 22, 2022	4	Zr_164	iRM_12			0.000263982	4.24807e-05	9.94262e-05	3.41426e-07	7.55291e-05	-1.64858e-06	6.77797e-05	6.1168e-06	-3.44008e-06						19.0084	4.22547	6.59117	4.67403e-05	6.94697	2.20485e-05	1.16037	1.15293e-05	-1.31272e-06					1	0	0	19.0082	4.22543	6.59107	4.63988e-05	6.9469	2.36971e-05	1.16031	5.41252e-06	2.12736e-06	0	0	0
Lab 1	Jun 22, 2022	4	Zr_168	iRM_UR			0.000248247	5.29004e-05	9.25383e-05	5.99493e-07	8.87169e-05	-8.29641e-07	5.2659e-05	2.0986e-05	1.09084e-06						20.0562	4.45832	6.95426	2.74228e-05	7.32955	2.0507e-05	1.22422	1.07145e-05	-1.36006e-06					1	0	0	20.056	4.45826	6.95417	2.68234e-05	7.32946	2.13366e-05	1.22416	-1.02715e-05	-2.4509e-06	0	0	0
Lab 1	Jun 22, 2022	4	Zr_172	iRM_12			0.000280488	5.03914e-05	9.02376e-05	2.95891e-06	8.40866e-05	-4.95282e-06	7.13483e-05	3.09091e-06	-4.04413e-06						18.7976	4.17857	6.51793	3.86761e-05	6.86971	2.11212e-05	1.14744	1.70869e-05	3.89832e-07					1	0	0	18.7973	4.17852	6.51784	3.57172e-05	6.86962	2.60741e-05	1.14737	1.3996e-05	4.43397e-06	0	0	0
Lab 1	Jun 22, 2022	5	Zr_004	iRM_12			0.000155583	2.63322e-05	5.90516e-05	-2.17381e-08	5.56013e-05	4.19737e-06	4.68039e-05	7.88272e-06	-1.68883e-06						20.7433	4.61123	7.19306	3.9224e-05	7.58186	2.3159e-05	1.26645	1.26138e-05	-3.46954e-06					1	0	0	20.7432	4.6112	7.19301	3.92458e-05	7.5818	1.89616e-05	1.26641	4.73108e-06	-1.78071e-06	0	0	0
Lab 1	Jun 22, 2022	5	Zr_008	iRM_UR			0.00371966	0.000819801	0.00128403	6.53398e-08	0.00134666	1.14116e-07	0.000275225	7.5977e-06	-1.86795e-06						20.423	4.54	7.08186	2.5713e-05	7.46443	2.09037e-05	1.24683	8.43814e-06	-4.45343e-06					1	0	0	20.4193	4.53918	7.08057	2.56477e-05	7.46309	2.07896e-05	1.24656	8.40441e-07	-2.58548e-06	0	0	0
Lab 1	Jun 22, 2022	5	Zr_012	iRM_12			0.000255654	6.30253e-05	8.5144e-05	-1.24338e-06	6.84863e-05	-1.60445e-06	7.32524e-05	4.08296e-06	-1.94887e-06						20.6292	4.58592	7.1538	4.63432e-05	7.54064	2.27395e-05	1.2596	5.91906e-06	-8.13444e-07					1	0	0	20.629	4.58586	7.15372	4.75866e-05	7.54057	2.43439e-05	1.25953	1.8361e-06	1.13543e-06	0	0	0
Lab 1	Jun 22, 2022	5	Zr_016	SRM			0.000818395	0.000183616	0.000294923	1.18526e-05	0.000290302	3.49624e-07	0.000102797	-5.05114e-07	-1.07243e-06						20.6054	4.58056	7.14524	4.99627e-05	7.5314	2.50629e-05	1.25804	3.83621e-06	3.04928e-07					1	0	0	20.6046	4.58038	7.14494	3.81101e-05	7.53111	2.47133e-05	1.25794	4.34132e-06	1.37736e-06	0	0	0
Lab 1	Jun 22, 2022	5	Zr_020	iRM_12			0.00026646	5.2052e-05	8.06218e-05	2.42749e-06	7.87617e-05	-1.49112e-06	6.43126e-05	1.53205e-05	-4.59285e-06						20.3645	4.52711	7.06198	4.06649e-05	7.44387	2.48406e-05	1.24349	7.25499e-06	-9.38789e-07					1	0	0	20.3642	4.52706	7.0619	3.82374e-05	7.44379	2.63317e-05	1.24342	-8.0655e-06	3.65406e-06	0	0	0
Lab 1	Jun 22, 2022	5	Zr_024	alfaA			0.00140033	0.000299661	0.000483655	4.74487e-06	0.000497325	1.25144e-06	0.000133985	5.2412e-06	-5.13629e-06						20.8315	4.63031	7.222	3.40285e-05	7.61062	2.32574e-05	1.271	1.69281e-05	7.83852e-07					1	0	0	20.8301	4.63001	7.22152	2.92836e-05	7.61012	2.2006e-05	1.27087	1.16868e-05	5.92014e-06	0	0	0
Lab 1	Jun 22, 2022	5	Zr_028	iRM_12			0.000265604	4.01207e-05	8.4649e-05	1.0547e-05	7.34909e-05	-3.13507e-07	6.14641e-05	1.40195e-05	-1.26314e-07						20.2753	4.50731	7.03119	4.27286e-05	7.41159	2.23195e-05	1.2381	1.39641e-05	-8.73776e-07					1	0	0	20.275	4.50727	7.0311	3.21816e-05	7.41151	2.2633e-05	1.23804	-5.54142e-08	-7.47462e-07	0	0	0
Lab 1	Jun 22, 2022	5	Zr_032	Ames			0.00238527	0.000514584	0.000823462	-1.08845e-07	0.000852911	-1.06187e-06	0.000196665	1.18811e-05	1.62857e-06						21.0593	4.68193	7.30404	3.03663e-05	7.70016	2.98776e-05	1.28647	1.79866e-05	8.55238e-06					1	0	0	21.0569	4.68141	7.30321	3.04752e-05	7.69931	3.09395e-05	1.28627	6.10549e-06	6.9238e-06	0	0	0
Lab 1	Jun 22, 2022	5	Zr_036	iRM_12			0.000250378	5.90432e-05	8.04687e-05	1.53009e-06	7.49215e-05	6.0434e-07	6.47997e-05	1.02076e-05	-5.07612e-06						20.4059	4.53644	7.07674	3.88148e-05	7.45985	2.37296e-05	1.24618	1.38982e-05	-2.91789e-07					1	0	0	20.4056	4.53638	7.07666	3.72847e-05	7.45978	2.31252e-05	1.24612	3.6906e-06	4.78433e-06	0	0	0
Lab 1	Jun 22, 2022	5	Zr_040	IPGP			0.000239885	4.2198e-05	7.76523e-05	7.50341e-06	7.23085e-05	5.89579e-07	7.42147e-05	5.07347e-06	-9.36486e-07						21.0114	4.67092	7.28626	3.00983e-05	7.68029	2.40756e-05	1.28295	1.91854e-05	1.69073e-06					1	0	0	21.0112	4.67088	7.28618	2.25949e-05	7.68021	2.3486e-05	1.28287	1.4112e-05	2.62722e-06	0	0	0
Lab 1	Jun 22, 2022	5	Zr_044	iRM_12			0.000293361	5.43379e-05	9.65953e-05	1.41915e-06	9.27221e-05	7.46795e-07	6.26807e-05	7.10904e-06	-1.75081e-06						20.3169	4.51663	7.04574	3.97728e-05	7.42712	2.2387e-05	1.24071	1.79974e-05	-1.50645e-06					1	0	0	20.3166	4.51658	7.04564	3.83536e-05	7.42702	2.16402e-05	1.24065	1.08883e-05	2.44366e-07	0	0	0
Lab 1	Jun 22, 2022	5	Zr_048	iRM_UR			0.00173023	0.000380549	0.000608596	1.52297e-07	0.000614067	7.60979e-07	0.00015249	1.12785e-05	-4.5056e-06						20.1615	4.48211	6.992	3.0168e-05	7.37049	2.08203e-05	1.23126	9.56079e-06	-1.64861e-06					1	0	0	20.1598	4.48173	6.99139	3.00157e-05	7.36988	2.00593e-05	1.23111	-1.71769e-06	2.85699e-06	0	0	0
Lab 1	Jun 22, 2022	5	Zr_052	iRM_12			0.000428771	9.66766e-05	0.000142263	1.06785e-06	0.000146806	8.20372e-07	7.18478e-05	2.00596e-05	-3.91889e-07						20.16	4.48178	6.99145	4.08963e-05	7.36997	2.23404e-05	1.23121	1.45563e-05	-1.77532e-06					1	0	0	20.1596	4.48168	6.9913	3.98285e-05	7.36983	2.152e-05	1.23114	-5.50327e-06	-1.38343e-06	0	0	0
Lab 1	Jun 22, 2022	5	Zr_056	SRM			0.000309678	3.2002e-05	0.000107746	6.58482e-06	9.94061e-05	1.39082e-07	6.22293e-05	3.95155e-06	-4.24739e-06						20.7151	4.60511	7.18375	4.45878e-05	7.57247	2.42803e-05	1.26498	1.04185e-05	2.32816e-06					1	0	0	20.7148	4.60508	7.18365	3.8003e-05	7.57237	2.41412e-05	1.26492	6.46691e-06	6.57555e-06	0	0	0
Lab 1	Jun 22, 2022	5	Zr_060	iRM_12			0.000289624	4.68174e-05	9.37997e-05	3.56215e-06	8.91814e-05	1.20697e-07	5.89116e-05	1.13621e-05	-3.04896e-06						20.2476	4.50136	7.02216	4.07048e-05	7.40274	2.12389e-05	1.23672	1.622e-05	-1.77767e-06					1	0	0	20.2473	4.50131	7.02206	3.71427e-05	7.40265	2.11182e-05	1.23666	4.85794e-06	1.27129e-06	0	0	0
Lab 1	Jun 22, 2022	5	Zr_064	alfaA			0.00212255	0.000476566	0.000734064	6.09852e-06	0.000763985	9.74651e-07	0.000183411	1.13892e-05	3.13867e-07						20.6254	4.58459	7.15094	3.39025e-05	7.53608	2.29889e-05	1.25862	1.69269e-05	-8.67961e-07					1	0	0	20.6233	4.58412	7.1502	2.78039e-05	7.53531	2.20143e-05	1.25844	5.5377e-06	-1.18183e-06	0	0	0
Lab 1	Jun 22, 2022	5	Zr_068	iRM_12			0.000264665	4.2689e-05	8.0286e-05	-5.90792e-06	6.96805e-05	2.18577e-06	7.32942e-05	9.50581e-06	3.91185e-06						20.2717	4.5067	7.03051	4.00247e-05	7.41141	2.2761e-05	1.23818	1.03646e-05	-1.08774e-06					1	0	0	20.2714	4.50666	7.03043	4.59326e-05	7.41134	2.05752e-05	1.23811	8.58839e-07	-4.99959e-06	0	0	0
Lab 1	Jun 22, 2022	5	Zr_072	Ames			0.000844248	0.000181168	0.00028872	-4.68958e-07	0.000293101	-2.06554e-06	0.000104803	1.79245e-05	1.21015e-06						21.1892	4.71108	7.34992	3.44703e-05	7.74938	2.96823e-05	1.29481	1.82583e-05	9.3172e-06					1	0	0	21.1884	4.7109	7.34963	3.49392e-05	7.74908	3.17479e-05	1.29471	3.33745e-07	8.10705e-06	0	0	0
Lab 1	Jun 22, 2022	5	Zr_076	iRM_12			0.00308738	0.000670572	0.00106186	1.49773e-05	0.0011079	-1.43723e-06	0.0002465	1.24925e-05	-2.10016e-06						20.1973	4.49013	7.00474	4.11819e-05	7.38429	2.25045e-05	1.23365	1.47421e-05	-1.62205e-06					1	0	0	20.1942	4.48946	7.00368	2.62046e-05	7.38319	2.39417e-05	1.2334	2.24962e-06	4.78103e-07	0	0	0
Lab 1	Jun 22, 2022	5	Zr_080	IPGP			0.000349112	5.42029e-05	0.000121412	2.35255e-06	0.000120787	-6.50462e-07	6.88947e-05	1.23248e-05	-5.67378e-06						21.0831	4.68692	7.31162	2.97638e-05	7.70754	2.5602e-05	1.2876	1.75703e-05	1.62409e-06					1	0	0	21.0827	4.68687	7.3115	2.74112e-05	7.70742	2.62524e-05	1.28753	5.24547e-06	7.29787e-06	0	0	0
Lab 1	Jun 22, 2022	5	Zr_084	iRM_12			0.00166306	0.000364296	0.000568733	-5.75783e-06	0.000585611	-1.49311e-06	0.000142513	5.57652e-06	-4.86813e-06						20.2089	4.49283	7.00902	4.25647e-05	7.3892	2.26621e-05	1.23451	1.53876e-05	-9.2396e-07					1	0	0	20.2072	4.49247	7.00845	4.83225e-05	7.38861	2.41552e-05	1.23436	9.81105e-06	3.94418e-06	0	0	0
Lab 1	Jun 22, 2022	5	Zr_088	iRM_UR			0.000262164	5.15491e-05	8.85555e-05	5.30609e-06	7.77081e-05	1.13756e-06	6.27733e-05	1.76663e-05	7.76238e-07						19.7447	4.38958	6.84782	2.76774e-05	7.21896	2.05682e-05	1.20602	1.50636e-05	-7.5529e-07					1	0	0	19.7444	4.38952	6.84773	2.23713e-05	7.21888	1.94306e-05	1.20595	-2.60273e-06	-1.53153e-06	0	0	0
Lab 1	Jun 22, 2022	5	Zr_092	iRM_12			0.000988662	0.00021159	0.000335499	-6.58929e-06	0.0003423	-1.51178e-06	0.000102197	1.81613e-05	-1.36634e-06						20.2002	4.49085	7.00608	4.16867e-05	7.38603	2.17699e-05	1.23396	1.81686e-05	-3.07453e-07					1	0	0	20.1992	4.49064	7.00574	4.8276e-05	7.38569	2.32816e-05	1.23386	7.38203e-09	1.05889e-06	0	0	0
Lab 1	Jun 22, 2022	5	Zr_096	SRM			0.000243322	5.76115e-05	8.7374e-05	3.2591e-06	6.09345e-05	-2.30988e-06	6.43006e-05	7.11524e-06	-3.25123e-06						20.6629	4.59373	7.16641	4.64747e-05	7.55501	2.65046e-05	1.2622	7.60944e-06	-5.80008e-07					1	0	0	20.6627	4.59368	7.16632	4.32156e-05	7.55495	2.88145e-05	1.26213	4.94204e-07	2.67122e-06	0	0	0
Lab 1	Jun 22, 2022	5	Zr_100	iRM_12			0.000255871	3.96683e-05	8.4976e-05	8.01954e-06	7.84952e-05	2.5861e-06	6.4713e-05	6.76468e-06	-2.06761e-06						19.9502	4.43539	6.9195	4.06992e-05	7.29494	2.23487e-05	1.21879	1.83194e-05	-2.3695e-07					1	0	0	19.95	4.43535	6.91941	3.26796e-05	7.29487	1.97626e-05	1.21873	1.15547e-05	1.83066e-06	0	0	0
Lab 1	Jun 22, 2022	5	Zr_104	alfaA			0.000254777	5.02693e-05	7.82915e-05	-1.26439e-06	7.35925e-05	-1.4886e-06	7.7344e-05	6.30828e-06	-4.40928e-07						20.6563	4.5916	7.16209	3.28052e-05	7.54843	2.32228e-05	1.26078	7.58276e-06	-6.08192e-07					1	0	0	20.656	4.59155	7.16201	3.40696e-05	7.54835	2.47114e-05	1.2607	1.27449e-06	-1.67264e-07	0	0	0
Lab 1	Jun 22, 2022	5	Zr_108	iRM_12			0.000265601	5.02396e-05	9.73757e-05	1.85125e-06	7.23173e-05	1.85793e-06	6.5051e-05	-1.18931e-06	-2.09333e-06						19.9664	4.43902	6.9253	4.12461e-05	7.30128	2.1674e-05	1.2199	1.86793e-05	-1.9519e-06					1	0	0	19.9661	4.43897	6.9252	3.93949e-05	7.30121	1.9816e-05	1.21983	1.98686e-05	1.41434e-07	0	0	0
Lab 1	Jun 22, 2022	5	Zr_112	Ames			0.000482123	9.23061e-05	0.000156969	-2.22503e-06	0.000157988	1.45099e-06	8.53549e-05	6.68956e-06	1.27173e-06						20.7211	4.60709	7.1879	2.81349e-05	7.57903	2.90458e-05	1.26641	1.6864e-05	9.02055e-06					1	0	0	20.7207	4.607	7.18774	3.03599e-05	7.57887	2.75948e-05	1.26633	1.01744e-05	7.74882e-06	0	0	0
Lab 1	Jun 22, 2022	5	Zr_116	iRM_12			0.000244726	3.86088e-05	7.80588e-05	-2.79825e-06	6.59151e-05	-5.34158e-06	6.39601e-05	5.18709e-06	-8.04823e-07						19.852	4.41358	6.88564	3.80975e-05	7.25944	1.94218e-05	1.21288	1.20237e-05	-1.871e-07					1	0	0	19.8517	4.41354	6.88556	4.08957e-05	7.25938	2.47634e-05	1.21282	6.83663e-06	6.17722e-07	0	0	0
Lab 1	Jun 22, 2022	5	Zr_120	IPGP			0.000242368	4.85372e-05	7.57935e-05	2.50866e-06	7.14194e-05	2.04757e-06	6.93905e-05	7.36188e-06	-4.09649e-06						20.8808	4.64223	7.24219	2.87469e-05	7.63506	2.39221e-05	1.27563	1.59968e-05	2.19871e-06					1	0	0	20.8806	4.64218	7.24211	2.62382e-05	7.63499	2.18745e-05	1.27556	8.63489e-06	6.29521e-06	0	0	0
Lab 1	Jun 22, 2022	5	Zr_124	iRM_12			0.000242857	5.39122e-05	8.24631e-05	1.52423e-06	6.27214e-05	1.30557e-06	5.3197e-05	1.08493e-05	-3.63061e-06						19.9471	4.43474	6.91869	4.57124e-05	7.29442	2.26175e-05	1.21873	1.36826e-05	-2.02037e-06					1	0	0	19.9468	4.43469	6.9186	4.41882e-05	7.29436	2.1312e-05	1.21868	2.83323e-06	1.61025e-06	0	0	0
Lab 1	Jun 22, 2022	5	Zr_128	iRM_UR			0.000256286	4.22873e-05	8.07278e-05	-7.66679e-06	6.72891e-05	1.24133e-06	6.02417e-05	-4.81534e-06	-2.75858e-06						19.8228	4.4071	6.87547	2.79873e-05	7.24875	1.79448e-05	1.2111	1.25631e-05	-5.78154e-06					1	0	0	19.8226	4.40706	6.87539	3.56541e-05	7.24869	1.67035e-05	1.21104	1.73784e-05	-3.02295e-06	0	0	0
Lab 1	Jun 22, 2022	5	Zr_132	iRM_12			0.00410665	0.000907469	0.00142461	1.53312e-06	0.00148845	1.2409e-06	0.000290387	4.95041e-06	1.25001e-06						19.9232	4.42951	6.91068	4.20184e-05	7.28622	2.09885e-05	1.2174	1.34617e-05	-5.12907e-07					1	0	0	19.9191	4.4286	6.90926	4.04853e-05	7.28473	1.97476e-05	1.21711	8.5113e-06	-1.76292e-06	0	0	0
Lab 1	Jun 22, 2022	5	Zr_136	SRM			0.000246166	4.81652e-05	8.15822e-05	2.11265e-06	7.10275e-05	-1.68686e-06	6.11742e-05	7.28959e-06	-2.65618e-06						20.3973	4.53483	7.07473	4.45088e-05	7.45879	2.43341e-05	1.24619	1.29967e-05	8.8728e-07					1	0	0	20.397	4.53479	7.07465	4.23961e-05	7.45872	2.6021e-05	1.24613	5.70714e-06	3.54346e-06	0	0	0
Lab 1	Jun 22, 2022	5	Zr_140	iRM_12			0.000248354	4.82068e-05	8.10313e-05	7.79744e-06	6.95787e-05	-3.90519e-06	5.9874e-05	1.36381e-05	-5.8426e-06						19.7357	4.38783	6.84554	4.26728e-05	7.21753	2.10124e-05	1.20594	1.41941e-05	-1.67918e-06					1	0	0	19.7354	4.38778	6.84546	3.48753e-05	7.21746	2.49175e-05	1.20588	5.55942e-07	4.16342e-06	0	0	0
Lab 1	Jun 22, 2022	5	Zr_144	alfaA			0.000946266	0.000199027	0.000321603	1.56611e-06	0.000329268	3.32103e-07	0.000106662	7.18476e-06	1.2093e-06						20.5591	4.57023	7.12915	3.17771e-05	7.51444	2.36276e-05	1.25522	1.3666e-05	-1.04558e-06					1	0	0	20.5581	4.57003	7.12883	3.0211e-05	7.51411	2.32955e-05	1.25512	6.48125e-06	-2.25488e-06	0	0	0
Lab 1	Jun 22, 2022	5	Zr_148	iRM_12			0.000270699	5.6424e-05	9.17371e-05	3.38206e-06	7.36766e-05	2.24702e-06	7.48722e-05	2.8117e-06	-3.80144e-06						19.704	4.38082	6.83476	3.64481e-05	7.20625	2.21128e-05	1.20408	1.38168e-05	-2.6201e-06					1	0	0	19.7038	4.38076	6.83467	3.3066e-05	7.20618	1.98658e-05	1.204	1.10051e-05	1.18134e-06	0	0	0
Lab 1	Jun 22, 2022	5	Zr_152	Ames			0.000250446	4.1457e-05	7.88307e-05	-6.431e-07	7.13896e-05	1.86299e-06	6.48626e-05	1.4613e-05	-2.19054e-06						20.8077	4.62654	7.21857	3.15146e-05	7.61195	3.02624e-05	1.27202	1.80049e-05	9.56708e-06					1	0	0	20.8075	4.6265	7.21849	3.21577e-05	7.61188	2.83994e-05	1.27196	3.39188e-06	1.17576e-05	0	0	0
Lab 1	Jun 22, 2022	5	Zr_156	iRM_12			0.000638054	0.000138457	0.00021	-3.19446e-06	0.000226808	-1.98618e-06	7.38956e-05	9.18468e-06	-5.89989e-07						19.785	4.39891	6.86309	4.29747e-05	7.23636	2.08012e-05	1.20915	9.40002e-06	-7.56676e-07					1	0	0	19.7843	4.39877	6.86288	4.61691e-05	7.23613	2.27874e-05	1.20907	2.15347e-07	-1.66687e-07	0	0	0
Lab 1	Jun 22, 2022	5	Zr_160	IPGP			0.000234815	4.3561e-05	8.39301e-05	-7.06108e-07	7.28083e-05	-9.55586e-07	6.28838e-05	3.73323e-06	-2.57847e-06						20.6285	4.58626	7.15514	2.38136e-05	7.54381	2.77399e-05	1.26045	1.3044e-05	5.53116e-08					1	0	0	20.6282	4.58622	7.15505	2.45197e-05	7.54374	2.86954e-05	1.26038	9.31077e-06	2.63378e-06	0	0	0
Lab 1	Jun 22, 2022	5	Zr_164	iRM_12			0.00261727	0.000588249	0.000910059	1.29303e-06	0.000941938	-2.14167e-06	0.000209954	4.40158e-06	9.77894e-07						19.7248	4.3855	6.84212	3.98083e-05	7.21431	2.12681e-05	1.20546	1.05329e-05	-2.9896e-06					1	0	0	19.7222	4.38492	6.84121	3.85153e-05	7.21337	2.34098e-05	1.20525	6.13131e-06	-3.9675e-06	0	0	0
Lab 1	Jun 22, 2022	5	Zr_168	iRM_UR			0.000241197	4.5448e-05	8.42631e-05	2.68572e-06	8.08151e-05	4.29808e-06	6.70981e-05	8.86277e-07	-1.16987e-06						19.378	4.30839	6.72179	2.49699e-05	7.08724	1.89408e-05	1.18421	7.03919e-06	-5.57538e-06					1	0	0	19.3777	4.30834	6.72171	2.22842e-05	7.08716	1.46427e-05	1.18414	6.15291e-06	-4.40551e-06	0	0	0
Lab 1	Jun 22, 2022	5	Zr_172	iRM_12			0.000258736	5.5936e-05	8.37063e-05	-1.09918e-06	7.42391e-05	-8.40468e-07	5.98621e-05	2.35653e-05	-3.76081e-06						19.6011	4.35798	6.79924	4.05043e-05	7.16906	2.18463e-05	1.19791	1.54618e-05	-2.4422e-06					1	0	0	19.6008	4.35792	6.79915	4.16034e-05	7.16898	2.26868e-05	1.19785	-8.10353e-06	1.31862e-06	0	0	0
Lab 1	Jun 22, 2022	5	Zr_176	SRM			0.00023745	5.32991e-05	8.9563e-05	2.4905e-06	8.00397e-05	-3.0259e-06	5.95871e-05	1.4934e-05	-4.92118e-06						20.4334	4.543	7.08759	3.8736e-05	7.4728	2.32314e-05	1.24861	1.19943e-05	8.85456e-07					1	0	0	20.4331	4.54294	7.0875	3.62455e-05	7.47272	2.62573e-05	1.24855	-2.93965e-06	5.80664e-06	0	0	0
Lab 1	Jun 22, 2022	5	Zr_180	iRM_12			0.00169074	0.000360467	0.000589705	4.01843e-06	0.000598203	-1.99028e-06	0.000158276	9.44587e-06	-2.95949e-06						19.7143	4.38323	6.83865	4.11597e-05	7.21079	2.02293e-05	1.20492	1.78894e-05	-2.60051e-06					1	0	0	19.7126	4.38286	6.83806	3.71413e-05	7.21019	2.22196e-05	1.20476	8.44349e-06	3.58981e-07	0	0	0
Lab 1	Jun 22, 2022	5	Zr_184	alfaA			0.000261482	4.89866e-05	8.5854e-05	1.71317e-06	7.76663e-05	-6.56664e-07	5.87652e-05	9.7577e-06	-4.00726e-06						20.4409	4.54406	7.08852	3.20011e-05	7.47198	2.28132e-05	1.24818	1.23171e-05	8.60772e-07					1	0	0	20.4407	4.54401	7.08843	3.02879e-05	7.4719	2.34699e-05	1.24812	2.55941e-06	4.86803e-06	0	0	0
Lab 1	Jun 22, 2022	5	Zr_188	iRM_12			0.000269312	5.49925e-05	9.24589e-05	2.54543e-07	7.18536e-05	3.12231e-07	5.54e-05	1.55697e-05	-3.62663e-06						19.4473	4.32389	6.7461	4.27927e-05	7.11319	1.99866e-05	1.18858	1.21614e-05	-1.43242e-06					1	0	0	19.447	4.32383	6.74601	4.25381e-05	7.11311	1.96744e-05	1.18852	-3.40832e-06	2.19421e-06	0	0	0
Lab 1	Jun 22, 2022	5	Zr_192	Ames			0.00432736	0.000957435	0.00149096	-1.29149e-06	0.00156721	-1.60691e-06	0.000310321	9.09214e-06	-4.53896e-06						20.8392	4.63362	7.22978	3.91754e-05	7.62411	3.03054e-05	1.27413	1.76188e-05	9.18968e-06					1	0	0	20.8349	4.63266	7.22829	4.04669e-05	7.62254	3.19123e-05	1.27382	8.52668e-06	1.37286e-05	0	0	0
Lab 1	Jun 22, 2022	5	Zr_196	iRM_12			0.00181937	0.000407614	0.000633252	1.35786e-05	0.000655423	-1.04322e-06	0.000157372	1.45084e-05	-4.38707e-06						19.7219	4.38496	6.84156	3.88071e-05	7.21404	2.04292e-05	1.20548	1.46013e-05	-2.65165e-06					1	0	0	19.7201	4.38455	6.84093	2.52285e-05	7.21338	2.14724e-05	1.20532	9.28392e-08	1.73542e-06	0	0	0
Lab 1	Jun 22, 2022	5	Zr_200	IPGP			0.000241999	5.1954e-05	7.82621e-05	6.08053e-06	8.50832e-05	1.87704e-06	6.78933e-05	8.08384e-07	-5.65037e-06						20.8077	4.62633	7.21798	2.75542e-05	7.61078	2.35488e-05	1.27177	1.69378e-05	4.53595e-08					1	0	0	20.8075	4.62628	7.2179	2.14737e-05	7.61069	2.16717e-05	1.2717	1.61294e-05	5.69573e-06	0	0	0
Lab 1	Jun 22, 2022	5	Zr_204	iRM_12			0.00023477	4.52991e-05	7.84565e-05	5.38711e-06	7.66635e-05	1.35509e-06	6.40525e-05	6.74039e-06	-2.99273e-06						19.61	4.36027	6.80315	4.49485e-05	7.17397	2.14301e-05	1.19886	1.06664e-05	-1.47419e-06					1	0	0	19.6098	4.36022	6.80307	3.95614e-05	7.17389	2.0075e-05	1.1988	3.92596e-06	1.51854e-06	0	0	0
Lab 1	Jun 22, 2022	5	Zr_208	iRM_UR			0.0031147	0.000685276	0.00107783	1.4434e-05	0.00110747	1.68153e-06	0.000233876	4.58751e-06	-2.20614e-06						19.2785	4.28644	6.68778	2.66412e-05	7.05191	2.01298e-05	1.17841	5.62061e-06	-3.64402e-06					1	0	0	19.2754	4.28575	6.6867	1.22072e-05	7.0508	1.84483e-05	1.17818	1.03311e-06	-1.43788e-06	0	0	0
Lab 1	Jun 22, 2022	5	Zr_212	iRM_12			0.000591238	0.000133634	0.000199622	1.03639e-05	0.000196652	1.80231e-06	7.84271e-05	3.80735e-06	-4.71203e-06						19.3944	4.31222	6.72804	4.23589e-05	7.09452	2.37107e-05	1.18554	1.20128e-05	-2.48426e-06					1	0	0	19.3938	4.31208	6.72784	3.1995e-05	7.09432	2.19083e-05	1.18546	8.20543e-06	2.22777e-06	0	0	0
Lab 1	Jun 22, 2022	5	Zr_216	SRM			0.000247075	5.97604e-05	7.81648e-05	-1.67869e-06	7.02821e-05	4.86839e-07	5.59138e-05	1.08581e-05	-1.73568e-06						20.228	4.49748	7.01692	4.09778e-05	7.39873	2.62619e-05	1.23633	1.31445e-05	1.1697e-06					1	0	0	20.2278	4.49742	7.01685	4.26565e-05	7.39866	2.5775e-05	1.23628	2.28632e-06	2.90538e-06	0	0	0
Lab 1	Jun 22, 2022	5	Zr_220	iRM_12			0.00471389	0.00104838	0.00163977	9.32828e-06	0.00170505	4.27167e-07	0.000332809	9.80571e-06	-3.8803e-06						19.54	4.34467	6.77884	3.91169e-05	7.14846	2.07841e-05	1.1946	5.0897e-06	-2.67359e-07					1	0	0	19.5352	4.34362	6.7772	2.97886e-05	7.14675	2.03569e-05	1.19427	-4.71601e-06	3.61294e-06	0	0	0
Lab 1	Jun 22, 2022	5	Zr_224	alfaA			0.00046279	9.565e-05	0.000157512	5.84042e-06	0.00014915	-3.39896e-06	6.68711e-05	1.49643e-05	-3.03267e-06						20.6622	4.59351	7.16603	2.91242e-05	7.55454	2.25969e-05	1.2621	1.67624e-05	1.52466e-06					1	0	0	20.6617	4.59341	7.16588	2.32838e-05	7.55439	2.59958e-05	1.26204	1.79808e-06	4.55734e-06	0	0	0
Lab 1	Jun 22, 2022	5	Zr_228	iRM_12			0.000284504	5.42754e-05	9.93909e-05	4.96393e-06	9.57271e-05	4.3944e-06	5.79134e-05	1.28469e-05	-3.35982e-06						19.5272	4.34193	6.77472	4.11978e-05	7.14429	1.95186e-05	1.19397	9.62133e-06	-1.54819e-06					1	0	0	19.527	4.34188	6.77462	3.62339e-05	7.14419	1.51242e-05	1.19391	-3.22562e-06	1.81162e-06	0	0	0
Lab 1	Jun 22, 2022	5	Zr_232	Ames			0.00024038	3.72308e-05	8.12669e-05	1.13033e-05	6.52748e-05	9.50907e-07	4.86151e-05	4.81488e-06	-2.25846e-06						21.0362	4.67779	7.29919	3.49707e-05	7.69838	2.99212e-05	1.28671	1.56937e-05	8.42305e-06					1	0	0	21.036	4.67775	7.2991	2.36674e-05	7.69832	2.89703e-05	1.28666	1.08789e-05	1.06815e-05	0	0	0
Lab 1	Jun 22, 2022	5	Zr_236	iRM_12			0.000387062	7.57483e-05	0.000134085	1.15854e-05	0.000125856	3.23891e-07	7.39786e-05	1.50961e-05	1.1897e-06						19.4887	4.33341	6.76138	3.71522e-05	7.13032	2.20149e-05	1.19166	1.54398e-05	-1.07755e-06					1	0	0	19.4884	4.33333	6.76125	2.55667e-05	7.1302	2.1691e-05	1.19158	3.43728e-07	-2.26726e-06	0	0	0
Lab 1	Jun 22, 2022	5	Zr_240	IPGP			0.000237572	4.49957e-05	8.07044e-05	-4.61426e-06	6.70196e-05	-8.34482e-07	6.00235e-05	6.71956e-06	-1.36552e-06						20.762	4.61636	7.20269	2.89628e-05	7.59533	2.62917e-05	1.26929	1.39349e-05	1.86975e-06					1	0	0	20.7618	4.61632	7.20261	3.3577e-05	7.59527	2.71262e-05	1.26923	7.21532e-06	3.23527e-06	0	0	0
Lab 1	Jun 22, 2022	5	Zr_244	iRM_12			0.000310733	6.27218e-05	0.00010886	2.84475e-06	8.66913e-05	3.4987e-06	5.75009e-05	8.35416e-06	-1.0389e-06						19.3493	4.30242	6.71305	3.69182e-05	7.07944	2.02272e-05	1.18313	1.14823e-05	-1.98e-07					1	0	0	19.349	4.30236	6.71294	3.40734e-05	7.07936	1.67285e-05	1.18308	3.12812e-06	8.40896e-07	0	0	0
Lab 1	Jun 23, 2022	6	Zr_004	iRM_12			0.000126197	1.16668e-05	4.1726e-05	-3.6542e-06	5.84089e-05	-2.51229e-06	4.77625e-05	7.54595e-06	-3.3584e-06						20.2534	4.50344	7.02688	3.38716e-05	7.41062	2.09716e-05	1.23853	1.02397e-05	-2.38419e-06					1	0	0	20.2533	4.50342	7.02684	3.75258e-05	7.41056	2.34839e-05	1.23848	2.69375e-06	9.74212e-07	0	0	0
Lab 1	Jun 23, 2022	6	Zr_008	iRM_UR			0.00205428	0.000452239	0.000705436	-3.44113e-06	0.000745838	4.71043e-07	0.000177092	3.8423e-06	-6.23383e-06						19.8097	4.40481	6.87297	1.61061e-05	7.24841	1.92833e-05	1.21144	4.80573e-06	-4.06604e-06					1	0	0	19.8076	4.40435	6.87227	1.95472e-05	7.24767	1.88123e-05	1.21127	9.63428e-07	2.16779e-06	0	0	0
Lab 1	Jun 23, 2022	6	Zr_012	iRM_12			0.000239087	4.64331e-05	7.51263e-05	-1.55608e-06	8.78396e-05	2.11697e-06	6.00107e-05	8.96844e-07	-1.82234e-06						19.847	4.41316	6.88634	3.26209e-05	7.26296	2.11878e-05	1.21391	4.3191e-06	-2.96975e-06					1	0	0	19.8468	4.41312	6.88626	3.4177e-05	7.26287	1.90709e-05	1.21385	3.42226e-06	-1.14741e-06	0	0	0
Lab 1	Jun 23, 2022	6	Zr_016	SRM			0.000231813	5.65459e-05	7.02892e-05	-2.16542e-06	9.18563e-05	1.50121e-06	6.38782e-05	-5.40133e-06	-2.51751e-06						21.1107	4.69411	7.32456	3.88324e-05	7.72477	2.35499e-05	1.29105	1.31891e-05	3.73238e-06					1	0	0	21.1105	4.69405	7.32449	4.09978e-05	7.72468	2.20487e-05	1.29099	1.85904e-05	6.24989e-06	0	0	0
Lab 1	Jun 23, 2022	6	Zr_020	iRM_12			0.000251174	3.51805e-05	7.90001e-05	6.80927e-06	8.60977e-05	-2.10168e-06	5.16749e-05	9.53631e-07	-3.90734e-06						19.7318	4.38771	6.84663	3.22186e-05	7.22129	2.08619e-05	1.20702	8.43891e-06	-9.6388e-07					1	0	0	19.7316	4.38767	6.84655	2.54093e-05	7.2212	2.29636e-05	1.20696	7.48528e-06	2.94346e-06	0	0	0
Lab 1	Jun 23, 2022	6	Zr_024	alfaA			0.000249687	4.84865e-05	8.45592e-05	-8.44173e-06	8.37241e-05	1.36772e-06	5.20783e-05	-2.96477e-07	-2.63893e-06						21.374	4.75208	7.41418	2.80586e-05	7.81763	2.47807e-05	1.30633	1.084e-05	-2.86445e-08					1	0	0	21.3737	4.75203	7.4141	3.65003e-05	7.81755	2.3413e-05	1.30628	1.11365e-05	2.61029e-06	0	0	0
Lab 1	Jun 23, 2022	6	Zr_028	iRM_12			0.000786531	0.000170164	0.000260678	1.97079e-06	0.000284156	-1.94527e-06	8.51395e-05	-1.3103e-06	-3.47406e-06						19.6549	4.37062	6.82015	3.54236e-05	7.19349	1.9454e-05	1.20237	1.73615e-06	-2.09428e-06					1	0	0	19.6542	4.37045	6.81989	3.34528e-05	7.19321	2.13992e-05	1.20228	3.04645e-06	1.37977e-06	0	0	0
Lab 1	Jun 23, 2022	6	Zr_032	Ames			0.000245349	5.12096e-05	8.44737e-05	-1.04498e-05	8.57685e-05	-2.66433e-06	5.77301e-05	-9.75576e-07	-1.28399e-06						21.4698	4.7745	7.45077	2.48065e-05	7.8596	2.71504e-05	1.3139	1.2924e-05	9.48951e-06					1	0	0	21.4695	4.77444	7.45068	3.52563e-05	7.85952	2.98148e-05	1.31384	1.38996e-05	1.07735e-05	0	0	0
Lab 1	Jun 23, 2022	6	Zr_036	iRM_12			0.000358919	7.51507e-05	0.000112618	-8.72069e-06	0.00012694	4.20253e-06	6.21299e-05	9.11742e-06	-2.90083e-06						19.6681	4.37357	6.82486	3.04009e-05	7.19859	1.96172e-05	1.20322	8.52883e-06	-2.90624e-06					1	0	0	19.6678	4.3735	6.82475	3.91216e-05	7.19846	1.54147e-05	1.20316	-5.88596e-07	-5.41608e-09	0	0	0
Lab 1	Jun 23, 2022	6	Zr_040	IPGP			0.000251356	4.82126e-05	7.01684e-05	-3.20105e-06	8.94589e-05	-2.148e-06	5.1086e-05	4.98428e-06	-2.14896e-06						21.3466	4.74672	7.40684	2.4146e-05	7.81202	2.55346e-05	1.30573	1.42111e-05	1.47373e-06					1	0	0	21.3463	4.74667	7.40677	2.73471e-05	7.81193	2.76826e-05	1.30567	9.22686e-06	3.62269e-06	0	0	0
Lab 1	Jun 23, 2022	6	Zr_044	iRM_12			0.0024054	0.000532735	0.000826848	-5.8334e-06	0.000873907	-5.18065e-06	0.000180745	-4.61518e-07	-3.9301e-06						19.9118	4.42793	6.9099	2.93664e-05	7.28878	1.79942e-05	1.2184	1.02691e-05	-3.82441e-06					1	0	0	19.9094	4.4274	6.90907	3.51998e-05	7.28791	2.31748e-05	1.21822	1.07306e-05	1.05688e-07	0	0	0
Lab 1	Jun 23, 2022	6	Zr_048	iRM_UR			0.000247693	5.15222e-05	7.76658e-05	-4.53969e-06	7.45324e-05	1.17185e-06	4.80016e-05	6.97634e-06	-4.67078e-06						19.8356	4.41101	6.88356	2.11328e-05	7.26111	1.93639e-05	1.21381	7.4494e-06	-2.0621e-06					1	0	0	19.8353	4.41095	6.88348	2.56725e-05	7.26103	1.81921e-05	1.21376	4.73066e-07	2.60868e-06	0	0	0
Lab 1	Jun 23, 2022	6	Zr_052	iRM_12			0.000260415	5.75786e-05	8.30744e-05	-3.04193e-06	8.45654e-05	1.80855e-06	5.20992e-05	3.06862e-06	-3.96688e-06						19.8474	4.41373	6.88782	3.84685e-05	7.26591	2.11096e-05	1.21463	1.09673e-05	-3.66549e-08					1	0	0	19.8471	4.41368	6.88774	4.15104e-05	7.26582	1.9301e-05	1.21458	7.89864e-06	3.93023e-06	0	0	0
Lab 1	Jun 23, 2022	6	Zr_056	SRM			0.000259619	2.55054e-05	7.54326e-05	-2.83182e-06	7.82647e-05	-1.87199e-06	4.58078e-05	1.116e-05	-3.11526e-06						21.4553	4.77114	7.44529	4.02616e-05	7.85331	2.32919e-05	1.31274	1.29117e-05	1.95705e-06					1	0	0	21.4551	4.77111	7.44521	4.30934e-05	7.85323	2.51639e-05	1.31269	1.75175e-06	5.07231e-06	0	0	0
Lab 1	Jun 23, 2022	6	Zr_060	iRM_12			0.000285917	5.50251e-05	9.67585e-05	-1.49312e-06	0.000100432	-1.32352e-06	5.03239e-05	-6.33148e-06	-4.71122e-06						19.7357	4.38877	6.84869	3.30376e-05	7.22412	2.00004e-05	1.20759	1.02743e-05	1.69779e-06					1	0	0	19.7354	4.38871	6.8486	3.45308e-05	7.22402	2.13239e-05	1.20754	1.66057e-05	6.40901e-06	0	0	0
Lab 1	Jun 23, 2022	6	Zr_064	alfaA			0.000251854	5.15787e-05	7.3291e-05	-2.08142e-06	7.51519e-05	-1.21889e-06	4.83216e-05	4.77231e-07	-5.33302e-06						21.4679	4.77303	7.44696	2.58577e-05	7.85237	2.49761e-05	1.31217	6.6849e-06	1.46949e-06					1	0	0	21.4676	4.77298	7.44689	2.79391e-05	7.85229	2.6195e-05	1.31212	6.20767e-06	6.80251e-06	0	0	0
Lab 1	Jun 23, 2022	6	Zr_068	iRM_12			0.000253994	4.43051e-05	8.87866e-05	-5.11634e-07	7.72681e-05	2.07736e-06	5.68185e-05	4.21957e-06	-3.56916e-06						19.4238	4.31926	6.73997	3.84916e-05	7.10903	2.02478e-05	1.18831	9.53451e-06	-1.49154e-06					1	0	0	19.4235	4.31922	6.73988	3.90032e-05	7.10895	1.81704e-05	1.18826	5.31494e-06	2.07761e-06	0	0	0
Lab 1	Jun 23, 2022	6	Zr_072	Ames			0.000249881	5.33049e-05	7.59187e-05	8.13304e-06	8.56756e-05	1.24692e-06	6.06233e-05	8.41276e-06	-1.3952e-06						21.3767	4.7537	7.41829	2.99032e-05	7.8251	3.28511e-05	1.30812	1.37363e-05	1.1745e-05					1	0	0	21.3765	4.75365	7.41821	2.17702e-05	7.82502	3.16042e-05	1.30806	5.3235e-06	1.31402e-05	0	0	0
Lab 1	Jun 23, 2022	6	Zr_076	iRM_12			0.000248527	3.48828e-05	8.08737e-05	2.13883e-06	8.64957e-05	-1.49019e-06	6.3116e-05	5.85176e-06	-3.20972e-06						19.3443	4.30154	6.71231	3.57556e-05	7.07983	2.02302e-05	1.18341	1.05282e-05	-8.23547e-07					1	0	0	19.344	4.30151	6.71223	3.36167e-05	7.07974	2.17204e-05	1.18335	4.67646e-06	2.38617e-06	0	0	0
Lab 1	Jun 23, 2022	6	Zr_080	IPGP			0.000240762	3.8347e-05	7.46402e-05	-7.06686e-07	8.52628e-05	4.33417e-06	4.97619e-05	-7.56273e-07	-4.40162e-06						21.0146	4.67277	7.29129	2.81181e-05	7.68984	2.34217e-05	1.28526	1.64923e-05	7.67902e-07					1	0	0	21.0144	4.67273	7.29121	2.88248e-05	7.68975	1.90875e-05	1.28521	1.72486e-05	5.16953e-06	0	0	0
Lab 1	Jun 23, 2022	6	Zr_084	iRM_12			0.00145041	0.000326137	0.000494822	8.20812e-06	0.000525814	-2.75554e-06	0.000131627	3.9263e-06	-2.29781e-06						19.4396	4.32281	6.74555	3.23525e-05	7.11498	2.12621e-05	1.18931	8.33316e-06	-1.18207e-06					1	0	0	19.4382	4.32249	6.74505	2.41444e-05	7.11446	2.40176e-05	1.18918	4.40686e-06	1.11574e-06	0	0	0
Lab 1	Jun 23, 2022	6	Zr_088	iRM_UR			0.000243224	4.57336e-05	7.52325e-05	1.25302e-05	7.37002e-05	-2.68539e-07	5.53152e-05	7.22198e-06	-2.47726e-06						19.0938	4.24588	6.62542	1.85053e-05	6.98819	1.86565e-05	1.1681	1.49459e-05	-2.8037e-06					1	0	0	19.0935	4.24583	6.62534	5.97511e-06	6.98812	1.8925e-05	1.16804	7.72394e-06	-3.26438e-07	0	0	0
Lab 1	Jun 23, 2022	6	Zr_092	iRM_12			0.000240285	4.77157e-05	7.22718e-05	3.74468e-06	8.42898e-05	-4.28147e-07	5.11848e-05	1.59881e-05	-1.174e-06						19.1438	4.25703	6.64292	3.48277e-05	7.0067	1.93426e-05	1.17119	1.38525e-05	-9.68875e-07					1	0	0	19.1436	4.25698	6.64284	3.10831e-05	7.00661	1.97708e-05	1.17114	-2.13564e-06	2.05128e-07	0	0	0
Lab 1	Jun 23, 2022	6	Zr_096	SRM			0.000492014	8.79048e-05	0.00014937	-1.30402e-06	0.000157619	5.8689e-07	7.14107e-05	1.21377e-05	-1.53938e-06						20.9726	4.66356	7.2771	3.61832e-05	7.67524	2.73824e-05	1.2829	9.8945e-06	3.44325e-06					1	0	0	20.9721	4.66347	7.27695	3.74872e-05	7.67509	2.67955e-05	1.28282	-2.24316e-06	4.98263e-06	0	0	0
Lab 1	Jun 23, 2022	6	Zr_100	iRM_12			0.000337664	6.79704e-05	0.000106349	3.86468e-06	0.000117294	-2.68461e-06	6.55042e-05	1.66515e-05	-3.00509e-06						19.2872	4.28897	6.6928	3.55126e-05	7.05952	2.0763e-05	1.18005	8.68129e-06	-5.46771e-07					1	0	0	19.2869	4.28891	6.69269	3.1648e-05	7.05941	2.34476e-05	1.17998	-7.97017e-06	2.45832e-06	0	0	0
Lab 1	Jun 23, 2022	6	Zr_104	alfaA			0.00216	0.000470256	0.000738505	-2.12641e-06	0.000782656	3.10662e-06	0.000171897	3.41947e-07	-6.17676e-06						21.3405	4.74469	7.40271	2.84155e-05	7.80564	2.2972e-05	1.30437	1.40528e-05	1.43809e-06					1	0	0	21.3383	4.74422	7.40197	3.05419e-05	7.80486	1.98654e-05	1.3042	1.37108e-05	7.61485e-06	0	0	0
Lab 1	Jun 23, 2022	6	Zr_108	iRM_12			0.000267679	5.229e-05	7.98133e-05	-3.429e-06	8.42481e-05	1.6523e-06	5.9915e-05	5.55384e-07	-3.0729e-06						19.4189	4.31823	6.73863	3.44731e-05	7.10797	2.09529e-05	1.18816	8.41835e-06	-1.30488e-06					1	0	0	19.4186	4.31818	6.73855	3.79021e-05	7.10788	1.93006e-05	1.1881	7.86296e-06	1.76802e-06	0	0	0
Lab 1	Jun 23, 2022	6	Zr_112	Ames			0.000245657	4.50253e-05	7.6561e-05	1.0015e-05	8.01985e-05	5.58597e-06	6.30444e-05	1.22548e-05	-4.10021e-06						21.5098	4.78347	7.46492	3.2801e-05	7.87471	3.38576e-05	1.31647	1.38807e-05	8.97403e-06					1	0	0	21.5096	4.78343	7.46485	2.2786e-05	7.87463	2.82717e-05	1.3164	1.62589e-06	1.30742e-05	0	0	0
Lab 1	Jun 23, 2022	6	Zr_116	iRM_12			0.000221893	4.13082e-05	7.7265e-05	2.95234e-06	8.74325e-05	-1.74176e-06	5.46488e-05	1.05422e-05	-2.75516e-06						19.144	4.25718	6.6433	3.1453e-05	7.00741	1.86385e-05	1.17137	5.6504e-06	-6.60003e-07					1	0	0	19.1438	4.25714	6.64322	2.85007e-05	7.00732	2.03803e-05	1.17132	-4.89184e-06	2.09516e-06	0	0	0
Lab 1	Jun 23, 2022	6	Zr_120	IPGP			0.00023021	4.74151e-05	7.38773e-05	-2.18038e-06	8.8513e-05	1.30839e-06	6.41741e-05	9.05767e-06	6.11574e-07						21.2245	4.71967	7.36489	2.6527e-05	7.76814	2.73796e-05	1.29848	1.42993e-05	2.02697e-06					1	0	0	21.2242	4.71962	7.36481	2.87073e-05	7.76805	2.60712e-05	1.29842	5.24164e-06	1.4154e-06	0	0	0
Lab 1	Jun 23, 2022	6	Zr_124	iRM_12			0.000236523	3.86208e-05	8.76406e-05	-1.20193e-06	9.90218e-05	-1.93749e-06	5.68963e-05	1.49421e-05	-1.85473e-06						19.1788	4.26497	6.65556	3.51284e-05	7.02062	2.02346e-05	1.17361	6.1358e-06	6.48703e-08					1	0	0	19.1786	4.26493	6.65547	3.63304e-05	7.02052	2.21721e-05	1.17355	-8.8063e-06	1.9196e-06	0	0	0
Lab 1	Jun 23, 2022	6	Zr_128	iRM_UR			0.000230791	4.49182e-05	7.51085e-05	2.9193e-06	8.25059e-05	2.4986e-06	5.62417e-05	4.52031e-06	-3.74281e-06						18.8817	4.19879	6.55222	1.55758e-05	6.91131	1.98198e-05	1.15531	1.29846e-05	-2.9634e-06					1	0	0	18.8815	4.19874	6.55214	1.26565e-05	6.91123	1.73212e-05	1.15526	8.46428e-06	7.79405e-07	0	0	0
Lab 1	Jun 23, 2022	6	Zr_132	iRM_12			0.00024159	5.18436e-05	7.525e-05	-9.21292e-06	9.03567e-05	1.60805e-06	5.58054e-05	7.97813e-06	-3.83937e-06						19.2757	4.28659	6.68941	2.9149e-05	7.0565	2.08465e-05	1.17966	1.53224e-05	7.20324e-07					1	0	0	19.2754	4.28653	6.68934	3.8362e-05	7.05641	1.92384e-05	1.1796	7.34422e-06	4.55969e-06	0	0	0
Lab 1	Jun 23, 2022	6	Zr_136	SRM			0.000303101	5.36739e-05	0.000102963	4.42594e-06	9.92377e-05	1.29914e-06	5.89616e-05	1.70442e-05	-3.45137e-06						20.9474	4.65809	7.26888	4.16066e-05	7.66704	2.30051e-05	1.2816	1.68136e-05	1.36993e-06					1	0	0	20.9471	4.65804	7.26878	3.71807e-05	7.66695	2.1706e-05	1.28154	-2.30611e-07	4.8213e-06	0	0	0
Lab 1	Jun 23, 2022	6	Zr_140	iRM_12			0.00024256	4.88585e-05	7.72208e-05	5.06833e-06	8.25777e-05	1.5461e-06	5.06857e-05	1.26558e-05	-3.08575e-06						19.1176	4.2514	6.63447	3.2622e-05	6.99843	1.83938e-05	1.16992	1.16325e-05	-2.01874e-06					1	0	0	19.1174	4.25136	6.63439	2.75537e-05	6.99835	1.68477e-05	1.16987	-1.0233e-06	1.06701e-06	0	0	0
Lab 1	Jun 23, 2022	6	Zr_144	alfaA			0.00135784	0.000293941	0.00046591	-4.9059e-06	0.00050049	1.82583e-06	0.000126215	7.97787e-06	-7.87713e-06						21.7034	4.82555	7.52921	3.09131e-05	7.93966	2.52658e-05	1.32686	1.0111e-05	-1.82614e-08					1	0	0	21.702	4.82526	7.52874	3.5819e-05	7.93916	2.344e-05	1.32673	2.13314e-06	7.85887e-06	0	0	0
Lab 1	Jun 23, 2022	6	Zr_148	iRM_12			0.000230353	3.78143e-05	7.63989e-05	-2.46865e-06	8.97042e-05	7.17083e-07	6.93598e-05	6.91015e-06	-2.72544e-06						19.0476	4.23587	6.61032	3.27157e-05	6.97314	2.02538e-05	1.16573	1.35302e-05	-2.85001e-06					1	0	0	19.0474	4.23583	6.61024	3.51843e-05	6.97305	1.95367e-05	1.16566	6.62007e-06	-1.24564e-07	0	0	0
Lab 1	Jun 23, 2022	6	Zr_152	Ames			0.00241334	0.000540869	0.000825887	1.80265e-06	0.000876744	1.08037e-06	0.000185788	4.99991e-06	-4.57945e-06						21.5851	4.80032	7.49142	3.45014e-05	7.90318	3.32175e-05	1.32129	1.49838e-05	9.89515e-06					1	0	0	21.5827	4.79978	7.49059	3.26988e-05	7.90231	3.21371e-05	1.32111	9.98384e-06	1.44746e-05	0	0	0
Lab 1	Jun 23, 2022	6	Zr_156	iRM_12			0.000262723	6.03852e-05	8.44827e-05	3.46252e-06	9.78725e-05	2.26676e-06	5.8863e-05	1.28129e-06	-1.2827e-06						19.2223	4.27475	6.67112	3.55355e-05	7.03757	2.1868e-05	1.17653	1.28998e-05	-8.19918e-07					1	0	0	19.2221	4.27468	6.67104	3.2073e-05	7.03747	1.96012e-05	1.17647	1.16186e-05	4.62779e-07	0	0	0
Lab 1	Jun 23, 2022	6	Zr_160	IPGP			0.000230087	4.40997e-05	7.18268e-05	1.1819e-05	8.1231e-05	2.36618e-06	5.2957e-05	1.63933e-05	-4.75573e-06						20.9808	4.66557	7.28065	2.37898e-05	7.67967	2.84627e-05	1.28374	1.83411e-05	2.30445e-06					1	0	0	20.9806	4.66552	7.28058	1.19708e-05	7.67959	2.60965e-05	1.28369	1.94785e-06	7.06018e-06	0	0	0
Lab 1	Jun 23, 2022	6	Zr_164	iRM_12			0.000239582	4.63794e-05	7.46254e-05	4.0568e-06	9.24549e-05	-3.60132e-06	6.3424e-05	1.59556e-05	-2.20917e-06						18.8945	4.20185	6.55732	3.59869e-05	6.9173	2.00401e-05	1.1564	1.04148e-05	4.12326e-07					1	0	0	18.8942	4.20181	6.55725	3.19301e-05	6.91721	2.36414e-05	1.15634	-5.54076e-06	2.6215e-06	0	0	0
Lab 1	Jun 23, 2022	6	Zr_168	iRM_UR			0.00025879	4.97127e-05	8.28005e-05	-3.19799e-06	8.2012e-05	-2.3129e-06	5.39763e-05	1.21463e-05	-3.02854e-06						18.8721	4.19688	6.5495	1.66672e-05	6.90917	1.86858e-05	1.15507	1.37229e-05	-3.38278e-06					1	0	0	18.8718	4.19683	6.54942	1.98651e-05	6.90909	2.09987e-05	1.15502	1.57655e-06	-3.54242e-07	0	0	0
Lab 1	Jun 23, 2022	6	Zr_172	iRM_12			0.000368152	6.44664e-05	0.000119409	1.73056e-06	0.00013135	1.04081e-07	5.3265e-05	1.71877e-06	2.54993e-07						18.905	4.20431	6.56119	3.93913e-05	6.9217	2.13197e-05	1.15721	2.13836e-05	4.36303e-07					1	0	0	18.9047	4.20424	6.56107	3.76608e-05	6.92157	2.12156e-05	1.15715	1.96648e-05	1.81309e-07	0	0	0
Lab 1	Jun 23, 2022	6	Zr_176	SRM			0.000230618	4.60253e-05	8.06587e-05	-2.97887e-06	7.58642e-05	-1.60365e-06	4.54193e-05	2.86862e-05	-2.84205e-06						20.7217	4.60801	7.19089	4.18852e-05	7.58523	2.75827e-05	1.26799	1.66733e-05	1.34006e-06					1	0	0	20.7214	4.60796	7.19081	4.48641e-05	7.58515	2.91863e-05	1.26795	-1.20129e-05	4.18211e-06	0	0	0
Lab 1	Jun 23, 2022	6	Zr_180	iRM_12			0.000247532	4.9927e-05	7.53266e-05	-8.68598e-07	8.23473e-05	-1.02656e-06	4.8166e-05	1.10313e-05	-2.24937e-06						18.9154	4.20664	6.56493	3.59305e-05	6.92581	2.09817e-05	1.15788	1.32316e-05	-1.10992e-06					1	0	0	18.9151	4.20659	6.56486	3.67991e-05	6.92573	2.20083e-05	1.15783	2.20024e-06	1.13945e-06	0	0	0
Lab 1	Jun 23, 2022	6	Zr_184	alfaA			0.000227587	5.04388e-05	6.88603e-05	6.25097e-06	8.56426e-05	-6.91842e-08	5.11459e-05	3.89877e-06	-5.30751e-06						21.5881	4.80006	7.48973	2.81814e-05	7.89859	2.6945e-05	1.32009	1.56542e-05	3.10524e-06					1	0	0	21.5878	4.80001	7.48966	2.19305e-05	7.89851	2.70142e-05	1.32004	1.17554e-05	8.41274e-06	0	0	0
Lab 1	Jun 23, 2022	6	Zr_188	iRM_12			0.000233227	4.76086e-05	7.69439e-05	5.02629e-06	8.28201e-05	3.14448e-06	5.39882e-05	4.38211e-06	8.75335e-07						18.7269	4.1647	6.49945	3.89609e-05	6.8567	2.12528e-05	1.14633	1.02652e-05	-7.78334e-07					1	0	0	18.7267	4.16466	6.49938	3.39346e-05	6.85662	1.81083e-05	1.14628	5.88305e-06	-1.65367e-06	0	0	0
Lab 1	Jun 23, 2022	6	Zr_192	Ames			0.000289797	5.90997e-05	8.82271e-05	1.33498e-05	0.000103185	-3.01451e-06	4.70721e-05	1.30644e-05	-2.21235e-06						21.7104	4.82841	7.53553	3.13494e-05	7.95037	3.25328e-05	1.32927	1.73259e-05	1.02652e-05					1	0	0	21.7101	4.82835	7.53544	1.79997e-05	7.95026	3.55473e-05	1.32922	4.26144e-06	1.24776e-05	0	0	0
Lab 1	Jun 23, 2022	6	Zr_196	iRM_12			0.0042754	0.000939446	0.00148203	3.51954e-06	0.00155152	-4.24635e-07	0.000297364	1.20685e-05	-1.60804e-06						18.8163	4.18465	6.53073	3.23406e-05	6.88996	1.87471e-05	1.15194	1.03994e-05	2.0754e-07					1	0	0	18.812	4.18371	6.52925	2.88211e-05	6.88841	1.91717e-05	1.15164	-1.66912e-06	1.81558e-06	0	0	0
Lab 1	Jun 23, 2022	6	Zr_200	IPGP			0.0013997	0.0002996	0.000484949	-3.91523e-07	0.000506867	-3.37284e-07	0.000109668	3.06861e-06	-1.01382e-06						20.8761	4.64239	7.24465	2.56318e-05	7.64216	2.51082e-05	1.27754	1.06268e-05	1.76988e-06					1	0	0	20.8747	4.64209	7.24417	2.60233e-05	7.64165	2.54455e-05	1.27743	7.55816e-06	2.7837e-06	0	0	0
Lab 1	Jun 23, 2022	6	Zr_204	iRM_12			0.000238363	3.37043e-05	8.44208e-05	2.6281e-06	8.42808e-05	-2.933e-06	4.93795e-05	1.47078e-05	3.35238e-07						18.7941	4.17972	6.52309	3.60891e-05	6.88193	1.95719e-05	1.1506	1.20982e-05	4.83421e-07					1	0	0	18.7938	4.17969	6.52301	3.3461e-05	6.88184	2.25049e-05	1.15055	-2.60958e-06	1.48183e-07	0	0	0
Lab 1	Jun 23, 2022	6	Zr_208	iRM_UR			0.00182431	0.000397397	0.000631555	9.80233e-07	0.000654403	1.89025e-06	0.000144819	7.78936e-06	-3.40041e-06						18.563	4.12833	6.44285	2.03555e-05	6.79723	1.81801e-05	1.13643	1.07666e-05	-8.83281e-07					1	0	0	18.5612	4.12793	6.44222	1.93753e-05	6.79658	1.62898e-05	1.13629	2.97722e-06	2.51713e-06	0	0	0
Lab 1	Jun 23, 2022	6	Zr_212	iRM_12			0.000530424	0.000111565	0.000190711	2.94642e-06	0.000188084	-8.81278e-07	6.2964e-05	1.28541e-05	-9.99815e-07						18.5416	4.12355	6.43541	3.54713e-05	6.78944	1.95181e-05	1.13515	1.30336e-05	-1.83898e-06					1	0	0	18.5411	4.12344	6.43522	3.25249e-05	6.78925	2.03994e-05	1.13508	1.7946e-07	-8.3917e-07	0	0	0
Lab 1	Jun 23, 2022	6	Zr_216	SRM			0.000232048	6.27392e-05	8.61971e-05	4.22496e-06	8.21349e-05	2.33503e-06	4.80256e-05	1.41409e-05	-1.11579e-06						20.9766	4.66491	7.28002	3.44278e-05	7.67987	2.79074e-05	1.28394	1.6211e-05	4.48806e-06					1	0	0	20.9764	4.66485	7.27994	3.02029e-05	7.67979	2.55723e-05	1.28389	2.07016e-06	5.60385e-06	0	0	0
Lab 1	Jun 23, 2022	6	Zr_220	iRM_12			0.000238297	6.18493e-05	7.60807e-05	1.86572e-06	8.18444e-05	-1.85113e-06	5.22995e-05	1.55505e-05	-2.50538e-06						18.8259	4.18689	6.53443	2.94684e-05	6.89428	2.07008e-05	1.15272	1.41804e-05	1.07854e-06					1	0	0	18.8256	4.18683	6.53436	2.76027e-05	6.89419	2.2552e-05	1.15266	-1.37004e-06	3.58391e-06	0	0	0
Lab 1	Jun 23, 2022	6	Zr_224	alfaA			0.00184367	0.000399425	0.000638694	-3.45617e-06	0.000668787	-9.17339e-07	0.000157349	7.19541e-06	-2.51601e-06						21.8563	4.8599	7.58329	2.75866e-05	7.99776	2.60765e-05	1.33673	2.1343e-05	2.44213e-06					1	0	0	21.8544	4.8595	7.58265	3.10427e-05	7.99709	2.69938e-05	1.33657	1.41476e-05	4.95814e-06	0	0	0
Lab 1	Jun 23, 2022	6	Zr_228	iRM_12			0.000231182	4.82246e-05	8.25795e-05	-1.37004e-05	8.78186e-05	-4.91734e-06	5.02851e-05	3.57531e-06	-2.80166e-06						18.8487	4.19202	6.54252	3.23423e-05	6.90289	1.91805e-05	1.1542	1.70291e-05	1.94141e-06					1	0	0	18.8485	4.19198	6.54243	4.60427e-05	6.9028	2.40978e-05	1.15415	1.34538e-05	4.74308e-06	0	0	0
Lab 1	Jun 23, 2022	6	Zr_232	Ames			0.000537611	0.000102285	0.000186288	-1.88929e-06	0.000189843	2.96575e-07	6.30033e-05	-2.0398e-06	-1.40289e-06						22.0107	4.8955	7.64071	2.91197e-05	8.06228	3.25279e-05	1.34813	1.66728e-05	9.77437e-06					1	0	0	22.0102	4.8954	7.64052	3.1009e-05	8.06209	3.22314e-05	1.34806	1.87126e-05	1.11773e-05	0	0	0
Lab 1	Jun 23, 2022	6	Zr_236	iRM_12			0.000347116	6.75585e-05	0.000123271	-4.36524e-07	0.000128593	-7.53032e-06	5.27092e-05	2.2917e-06	-5.05029e-06						18.7006	4.15908	6.49116	3.44014e-05	6.8488	2.04493e-05	1.14518	1.19265e-05	2.82869e-07					1	0	0	18.7003	4.15902	6.49104	3.4838e-05	6.84867	2.79797e-05	1.14512	9.63476e-06	5.33316e-06	0	0	0
Lab 1	Jun 23, 2022	6	Zr_240	IPGP			0.000861763	0.000189062	0.000290139	1.40672e-05	0.000322994	1.42305e-05	8.03771e-05	1.74638e-05	-5.20022e-06						21.0584	4.68314	7.30853	2.3476e-05	7.71022	3.94829e-05	1.28904	1.34541e-05	2.71571e-06					1	0	0	21.0575	4.68295	7.30824	9.40879e-06	7.70989	2.52525e-05	1.28895	-4.00971e-06	7.91593e-06	0	0	0
Lab 1	Jun 23, 2022	6	Zr_244	iRM_12			0.000247585	4.0594e-05	7.47669e-05	1.19935e-06	8.38589e-05	2.43654e-06	5.03209e-05	1.16213e-05	-8.14408e-07						18.782	4.17718	6.51945	3.2721e-05	6.87875	2.04756e-05	1.15017	1.27165e-05	1.25291e-06					1	0	0	18.7817	4.17714	6.51937	3.15217e-05	6.87867	1.8039e-05	1.15012	1.09514e-06	2.06732e-06	0	0	0
Lab 2	May 28, 2020	1	45	SRM 3169			0.0060243	0.0012854	0.00191809		0.00182988	1.13305e-05	0.000301246			4.22752e-07	1.15943e-05	5.665e-06			41.708	9.2653	14.4431		15.205	1.59844e-05	2.53695			3.24891e-07	2.27219e-05	2.69562e-07		1	0	0	41.7019	9.26402	14.4412	0	15.2032	4.6539e-06	2.53664	0	0	-9.78611e-08	1.11275e-05	-5.39543e-06
Lab 2	May 28, 2020	1	48	SRM 3169			0.00695154	0.00149077	0.00221207		0.00215817	1.75241e-05	0.000367132			-1.34793e-06	2.27702e-05	1.17936e-06			41.7033	9.26436	14.4418		15.2039	1.1492e-05	2.53683			3.3852e-06	2.40497e-05	5.11828e-06		1	0	0	41.6963	9.26287	14.4395	0	15.2017	-6.03211e-06	2.53646	0	0	4.73313e-06	1.27944e-06	3.93892e-06
Lab 2	May 28, 2020	1	51	SRM 3169			0.00678799	0.00145859	0.00216602		0.00206293	1.07919e-05	0.000340281			1.61082e-06	3.02518e-06	1.26042e-06			41.6186	9.24559	14.4127		15.1734	3.09438e-05	2.53177			1.56397e-06	1.16498e-05	9.3567e-07		1	0	0	41.6118	9.24413	14.4105	0	15.1714	2.01519e-05	2.53143	0	0	-4.6851e-08	8.62462e-06	-3.2475e-07
Lab 2	May 28, 2020	1	54	Bottle 1			0.00733361	0.0015692	0.002356		0.00227055	1.14223e-06	0.000379112			7.79361e-06	1.03305e-05	7.79105e-06			42.6116	9.466	14.756		15.5342	3.04637e-05	2.59185			1.18749e-06	1.46767e-05	7.66419e-06		1	0	0	42.6043	9.46443	14.7536	0	15.532	2.93214e-05	2.59147	0	0	-6.60612e-06	4.34622e-06	-1.26856e-07
Lab 2	May 28, 2020	1	57	SRM 3169			0.00763106	0.00161895	0.00243527		0.00236192	1.20683e-05	0.000388352			4.84681e-06	7.1245e-06	1.9851e-06			41.722	9.26839	14.4481		15.2104	3.00921e-05	2.53788			1.49242e-06	2.77323e-05	5.98933e-06		1	0	0	41.7144	9.26677	14.4457	0	15.2081	1.80238e-05	2.53749	0	0	-3.35439e-06	2.06078e-05	4.00423e-06
Lab 2	May 28, 2020	1	60	Bottle 2			0.00899242	0.0019314	0.00290941		0.00283348	1.56111e-06	0.000470826			3.54949e-06	1.94589e-06	5.35107e-06			42.1261	9.35796	14.5873		15.3561	2.74725e-05	2.56207			-9.90597e-08	1.56804e-05	9.54944e-06		1	0	0	42.1171	9.35603	14.5844	0	15.3533	2.59114e-05	2.5616	0	0	-3.64855e-06	1.37345e-05	4.19838e-06
Lab 2	May 28, 2020	1	63	SRM 3169			0.00826429	0.00177612	0.00263473		0.00256695	1.27371e-05	0.000431806			5.97024e-06	1.50744e-05	-5.96496e-07			41.746	9.2736	14.4558		15.2179	2.40364e-05	2.53902			-8.88198e-07	1.37439e-05	-1.70486e-06		1	0	0	41.7378	9.27182	14.4532	0	15.2153	1.12994e-05	2.53859	0	0	-6.85844e-06	-1.33048e-06	-1.10836e-06
Lab 2	May 28, 2020	1	66	Bottle 3			0.00759065	0.00161852	0.00240473		0.00229705	1.8972e-05	0.000371356			4.25793e-06	2.20446e-06	-1.78571e-06			42.5909	9.46092	14.7475		15.524	3.46942e-05	2.58998			-3.08807e-06	1.95854e-05	1.53259e-07		1	0	0	42.5833	9.45931	14.745	0	15.5217	1.57222e-05	2.58961	0	0	-7.346e-06	1.7381e-05	1.93897e-06
Lab 2	May 28, 2020	1	69	SRM 3169			0.00769958	0.00163581	0.00243909		0.00233665	1.09917e-05	0.000365537			2.10205e-06	1.66276e-05	4.54062e-06			41.8067	9.28661	14.4754		15.2372	2.28259e-05	2.54208			2.68939e-06	1.29101e-05	-1.00595e-06		1	0	0	41.799	9.28497	14.4729	0	15.2349	1.18342e-05	2.54171	0	0	5.8734e-07	-3.71758e-06	-5.54657e-06
Lab 2	May 28, 2020	1	72	Bottle 4			0.00853178	0.00180916	0.00272591		0.00260368	-1.3443e-06	0.000430096			4.41685e-06	2.82154e-06	4.13268e-06			42.6708	9.47821	14.7736		15.5499	3.11252e-05	2.59408			5.63857e-06	6.98087e-06	4.60833e-06		1	0	0	42.6623	9.4764	14.7708	0	15.5473	3.24695e-05	2.59365	0	0	1.22172e-06	4.15933e-06	4.75653e-07
Lab 2	May 28, 2020	1	75	SRM 3169			0.00983772	0.00210739	0.00315857		0.00307838	1.16807e-05	0.000491495			-2.36754e-07	1.67436e-05	5.59102e-06			42.0818	9.34757	14.5704		15.3368	3.19641e-05	2.55861			1.58627e-06	2.09429e-05	3.35253e-06		1	0	0	42.072	9.34546	14.5672	0	15.3337	2.02834e-05	2.55811	0	0	1.82303e-06	4.19926e-06	-2.23849e-06
Lab 2	May 28, 2020	1	78	Bottle 5			0.00858626	0.00183684	0.00271986		0.00261522	7.52151e-06	0.000432165			1.42657e-06	1.78519e-05	7.50244e-06			43.5048	9.66324	15.0617		15.8527	2.70496e-05	2.64445			8.54531e-06	6.36351e-06	-2.22715e-06		1	0	0	43.4962	9.6614	15.059	0	15.85	1.95281e-05	2.64402	0	0	7.11874e-06	-1.14884e-05	-9.72959e-06
Lab 2	May 28, 2020	1	81	SRM 3169			0.00839941	0.00179661	0.00267124		0.00253014	1.78062e-05	0.000418176			2.59107e-06	9.52789e-06	2.1346e-06			42.3278	9.40193	14.6548		15.4249	1.83832e-05	2.57318			3.35501e-06	4.85756e-06	1.76582e-06		1	0	0	42.3194	9.40013	14.6521	0	15.4223	5.77071e-07	2.57277	0	0	7.63935e-07	-4.67033e-06	-3.68788e-07
Lab 2	May 28, 2020	1	84	Bottle 6			0.00934566	0.00200257	0.00298216		0.00287717	9.80906e-06	0.00046009			5.15609e-06	1.63894e-05	3.19641e-07			43.4506	9.651	15.0423		15.8315	3.17606e-05	2.64081			6.38167e-07	1.50307e-05	2.12134e-06		1	0	0	43.4412	9.649	15.0393	0	15.8286	2.19516e-05	2.64035	0	0	-4.51793e-06	-1.35864e-06	1.8017e-06
Lab 2	May 28, 2020	1	87	SRM 3169			0.00913962	0.00196436	0.00289946		0.00278876	1.03359e-05	0.000458986			6.58447e-06	1.31867e-05	5.37595e-06			42.6151	9.46569	14.7538		15.5288	3.32851e-05	2.59048			1.66818e-06	2.82789e-05	3.11809e-06		1	0	0	42.606	9.46373	14.7509	0	15.526	2.29492e-05	2.59002	0	0	-4.91629e-06	1.50922e-05	-2.25786e-06
Lab 2	May 28, 2020	1	90	bottle 1			0.00878554	0.00186228	0.00277027		0.00263367	1.1676e-05	0.000428841			7.0414e-06	2.99214e-05	8.7137e-06			44.8137	9.95368	15.514		16.3277	3.48656e-05	2.72356			3.46025e-06	9.82292e-06	6.77137e-06		1	0	0	44.8049	9.95182	15.5112	0	16.325	2.31896e-05	2.72313	0	0	-3.58115e-06	-2.00985e-05	-1.94233e-06
Lab 2	May 28, 2020	1	93	SRM 3169			0.00966031	0.00205897	0.00307917		0.00293818	1.67448e-05	0.000487132			7.07827e-07	1.56452e-05	4.41678e-07			42.6392	9.47078	14.7613		15.5357	2.87647e-05	2.59147			-8.30908e-07	1.26584e-05	7.69342e-06		1	0	0	42.6295	9.46872	14.7582	0	15.5328	1.202e-05	2.59098	0	0	-1.53873e-06	-2.98679e-06	7.25174e-06
Lab 2	May 28, 2020	1	96	bottle 2			0.00961216	0.00204865	0.00305713		0.00293868	7.49418e-07	0.000472545			4.11026e-06	1.52576e-05	-1.28327e-06			44.0907	9.79289	15.2631		16.0632	2.39789e-05	2.67934			-3.9593e-07	2.32001e-05	4.93803e-06		1	0	0	44.0811	9.79085	15.2601	0	16.0603	2.32295e-05	2.67887	0	0	-4.50619e-06	7.94255e-06	6.2213e-06
Lab 2	May 28, 2020	1	99	SRM 3169			0.0104805	0.00224218	0.00334334		0.00321802	7.87463e-06	0.000534276			4.57169e-06	1.19709e-05	4.5436e-06			43.0085	9.55271	14.8889		15.6697	3.02481e-05	2.6138			5.1403e-06	1.07074e-05	5.88634e-06		1	0	0	42.998	9.55047	14.8855	0	15.6665	2.23735e-05	2.61326	0	0	5.68609e-07	-1.26348e-06	1.34275e-06
Lab 2	May 28, 2020	1	102	bottle 3			0.00949367	0.00203085	0.0030079		0.00285534	1.08945e-05	0.000466944			5.58518e-06	1.26316e-05	2.6817e-06			44.5501	9.89481	15.4217		16.2295	1.47507e-05	2.70699			1.05069e-05	1.57666e-05	5.33173e-06		1	0	0	44.5406	9.89278	15.4187	0	16.2266	3.85627e-06	2.70652	0	0	4.92173e-06	3.13498e-06	2.65003e-06
Lab 2	May 28, 2020	1	105	SRM 3169			0.00977839	0.00209259	0.00308783		0.0029427	2.68371e-06	0.000472764			2.01367e-06	1.26918e-05	-3.44236e-06			43.0778	9.56794	14.9125		15.6941	3.67998e-05	2.61776			-3.69951e-07	1.63854e-05	6.43909e-06		1	0	0	43.0681	9.56585	14.9094	0	15.6912	3.4116e-05	2.61729	0	0	-2.38362e-06	3.69366e-06	9.88145e-06
Lab 2	May 28, 2020	1	108	bottle 4			0.00994623	0.00210963	0.00313744		0.00300835	1.10476e-05	0.000495446			8.04744e-06	1.2753e-05	-1.11652e-06			44.1779	9.81187	15.2919		16.0919	2.92048e-05	2.68387			4.90893e-06	6.12009e-06	-6.72046e-07		1	0	0	44.1679	9.80976	15.2888	0	16.0889	1.81572e-05	2.68338	0	0	-3.1385e-06	-6.63291e-06	4.44477e-07
Lab 2	May 28, 2020	1	111	SRM 3169			0.0116296	0.00249257	0.00373415		0.00360201	2.08794e-05	0.00058562			2.82931e-06	1.58725e-05	4.48096e-06			43.2905	9.61498	14.9855		15.7704	2.03769e-05	2.63039			4.19837e-06	2.96715e-05	9.92941e-07		1	0	0	43.2789	9.61248	14.9818	0	15.7668	-5.02482e-07	2.6298	0	0	1.36906e-06	1.3799e-05	-3.48802e-06
Lab 2	May 28, 2020	1	114	bottle 5			0.0120679	0.00257213	0.00385944		0.00374111	1.15341e-05	0.000605063			4.08179e-06	8.5962e-06	-1.92204e-06			44.7163	9.93138	15.478		16.2874	2.8351e-05	2.71642			5.65969e-07	2.35843e-05	1.90798e-06		1	0	0	44.7042	9.92881	15.4741	0	16.2837	1.6817e-05	2.71582	0	0	-3.51583e-06	1.49881e-05	3.83002e-06
Lab 2	May 28, 2020	1	117	SRM 3169			0.0116664	0.00248804	0.0037199		0.00361309	-4.85114e-06	0.000579795			9.02738e-07	1.56881e-05	2.59813e-06			43.3398	9.6259	15.0024		15.7878	2.96708e-05	2.63324			5.59449e-06	1.15009e-05	5.10799e-06		1	0	0	43.3281	9.62341	14.9987	0	15.7842	3.4522e-05	2.63266	0	0	4.69175e-06	-4.18717e-06	2.50985e-06
Lab 2	May 28, 2020	1	120	bottle 6			0.0104447	0.002235	0.00330588		0.00315469	2.23397e-05	0.000508303			4.69676e-06	2.16782e-05	-5.89289e-06			44.6381	9.91384	15.4505		16.2581	2.84228e-05	2.71146			5.02294e-06	1.42645e-05	1.06077e-06		1	0	0	44.6276	9.91161	15.4472	0	16.2549	6.08308e-06	2.71095	0	0	3.26181e-07	-7.41373e-06	6.95366e-06
Lab 2	May 28, 2020	1	123	SRM 3169			0.0107169	0.00228482	0.00338853		0.00323323	1.52702e-05	0.000519375			4.32011e-06	1.87881e-05	-2.91509e-07			43.5442	9.67121	15.0729		15.8617	4.53156e-05	2.64551			2.44375e-06	1.47734e-05	8.54968e-06		1	0	0	43.5334	9.66892	15.0695	0	15.8585	3.00454e-05	2.64499	0	0	-1.87636e-06	-4.01462e-06	8.84119e-06
Lab 2	May 28, 2020	1	126	bottle 1			0.0121593	0.00260499	0.00388942		0.00376717	7.96098e-06	0.000599014			4.68397e-07	9.21656e-06	1.75869e-06			46.4446	10.3151	16.0758		16.9161	2.99664e-05	2.82119			7.10579e-06	1.28817e-05	3.25777e-06		1	0	0	46.4324	10.3125	16.0719	0	16.9123	2.20054e-05	2.82059	0	0	6.6374e-06	3.66518e-06	1.49907e-06
Lab 2	May 28, 2020	1	129	SRM 3169			0.0133805	0.00287232	0.00428872		0.00417847	1.15614e-05	0.000661349			-2.90153e-06	1.44278e-05	3.2063e-06			43.2831	9.61318	14.9822		15.7659	3.41044e-05	2.62946			3.2824e-06	1.99587e-05	-2.6058e-07		1	0	0	43.2697	9.6103	14.978	0	15.7617	2.25429e-05	2.6288	0	0	6.18393e-06	5.53095e-06	-3.46688e-06
Lab 2	May 28, 2020	1	132	bottle 2			0.0110736	0.00236563	0.00349062		0.00333197	3.59907e-07	0.000532933			2.74263e-06	1.61936e-05	-7.35132e-07			45.4348	10.0908	15.7262		16.548	2.09184e-05	2.75976			-9.00163e-07	2.38113e-05	1.28774e-06		1	0	0	45.4237	10.0884	15.7228	0	16.5447	2.05585e-05	2.75923	0	0	-3.64279e-06	7.61771e-06	2.02287e-06
Lab 2	May 28, 2020	1	135	SRM 3169			0.0127888	0.0027442	0.00407437		0.0039545	2.06674e-05	0.00064197			5.85966e-07	9.40569e-06	-1.66023e-06			43.3438	9.62653	15.0029		15.7872	2.86039e-05	2.63298			6.78032e-06	1.22468e-05	6.92599e-06		1	0	0	43.3311	9.62378	14.9988	0	15.7833	7.9365e-06	2.63234	0	0	6.19436e-06	2.84106e-06	8.58621e-06
Lab 2	May 28, 2020	1	138	bottle 3			0.0125067	0.00265826	0.00399089		0.00384386	1.38395e-05	0.00061328			1.48752e-06	1.66386e-05	9.82304e-06			45.7497	10.1606	15.8348		16.6616	2.75368e-05	2.77865			-4.96964e-07	1.19408e-05	2.72935e-06		1	0	0	45.7372	10.1579	15.8308	0	16.6578	1.36973e-05	2.77803	0	0	-1.98449e-06	-4.69778e-06	-7.09369e-06
Lab 2	May 28, 2020	1	141	SRM 3169			0.0117853	0.00250046	0.00372583		0.00357734	2.27607e-05	0.000566511			1.9424e-06	5.18981e-06	4.15262e-06			43.6091	9.68531	15.0943		15.883	2.67466e-05	2.64887			1.86642e-06	1.85964e-05	6.86207e-06		1	0	0	43.5973	9.68281	15.0906	0	15.8794	3.98585e-06	2.6483	0	0	-7.59772e-08	1.34066e-05	2.70945e-06
Lab 2	May 28, 2020	1	144	bottle 4			0.0114593	0.00243315	0.00360831		0.00345307	1.28873e-05	0.000544973			-2.79535e-07	1.00777e-05	5.36375e-06			44.8291	9.95584	15.5153		16.3246	2.41428e-05	2.7223			1.36501e-06	1.04611e-05	4.33845e-06		1	0	0	44.8177	9.95341	15.5116	0	16.3212	1.12554e-05	2.72176	0	0	1.64455e-06	3.8338e-07	-1.0253e-06
Lab 2	May 28, 2020	1	147	SRM 3169			0.0114812	0.002437	0.00363637		0.00345013	2.1733e-05	0.000545482			1.21173e-06	1.73945e-05	-2.28698e-06			43.6762	9.70008	15.1171		15.9067	3.35999e-05	2.65274			5.96318e-06	2.33142e-05	5.56161e-06		1	0	0	43.6648	9.69764	15.1135	0	15.9032	1.18669e-05	2.6522	0	0	4.75145e-06	5.91973e-06	7.8486e-06
Lab 2	May 28, 2020	1	150	bottle 5			0.011364	0.00241196	0.0035747		0.00340988	2.10412e-05	0.000543967			5.41901e-06	5.3497e-06	1.77132e-06			45.3949	10.0814	15.7108		16.5301	3.08347e-05	2.75654			3.00282e-07	1.12184e-05	-3.80036e-06		1	0	0	45.3835	10.079	15.7072	0	16.5267	9.79347e-06	2.756	0	0	-5.11873e-06	5.86867e-06	-5.57169e-06
Lab 2	May 28, 2020	1	153	SRM 3169			0.0120666	0.00257159	0.00381808		0.00364807	9.55715e-06	0.000588972			4.4279e-06	-2.76614e-07	5.07249e-06			43.9545	9.76175	15.2131		16.0073	3.68936e-05	2.6695			-1.39187e-06	1.62227e-05	-6.69206e-06		1	0	0	43.9425	9.75918	15.2092	0	16.0037	2.73365e-05	2.66891	0	0	-5.81977e-06	1.64993e-05	-1.17646e-05
Lab 2	May 28, 2020	1	156	bottle 6			0.0108339	0.00231187	0.00343018		0.00327124	4.0256e-06	0.000539749			2.38467e-06	8.47596e-06	2.39382e-06			44.6955	9.92481	15.4651		16.2684	2.65447e-05	2.71247			3.63342e-06	2.03353e-05	3.46216e-06		1	0	0	44.6847	9.9225	15.4617	0	16.2651	2.25191e-05	2.71193	0	0	1.24874e-06	1.18594e-05	1.06834e-06
Lab 2	May 28, 2020	1	159	SRM 3169			0.0115866	0.00247017	0.00367319		0.00350661	1.60804e-05	0.000559996			4.72154e-06	1.68349e-05	-9.15741e-07			43.9239	9.75465	15.2016		15.9944	3.00344e-05	2.66723			3.64719e-06	1.25935e-05	4.3149e-06		1	0	0	43.9123	9.75218	15.1979	0	15.9909	1.39541e-05	2.66667	0	0	-1.07435e-06	-4.24144e-06	5.23064e-06
Lab 2	May 28, 2020	1	162	bottle 1			0.0115546	0.00245347	0.00363894		0.00345555	7.76576e-06	0.000538682			-2.1114e-06	1.6267e-05	3.30805e-06			47.852	10.6267	16.5601		17.4229	2.52069e-05	2.90528			5.45696e-06	8.86021e-06	-2.06209e-06		1	0	0	47.8404	10.6243	16.5565	0	17.4195	1.74411e-05	2.90474	0	0	7.56836e-06	-7.40676e-06	-5.37014e-06
Lab 2	May 28, 2020	1	165	SRM 3169			0.0122215	0.0026166	0.00386478		0.00367434	1.41406e-05	0.00059223			5.45206e-07	1.72727e-05	1.22979e-06			44.1952	9.81505	15.2957		16.0935	2.99735e-05	2.6837			3.42945e-06	2.82783e-05	5.0109e-07		1	0	0	44.183	9.81243	15.2919	0	16.0899	1.58329e-05	2.68311	0	0	2.88424e-06	1.10056e-05	-7.28704e-07
Lab 2	May 28, 2020	1	168	bottle 2			0.0131176	0.00278705	0.00416342		0.00397761	1.47994e-08	0.000639421			-1.25169e-06	6.73205e-06	2.45345e-06			46.4727	10.3206	16.0831		16.9209	4.17882e-05	2.82153			1.43094e-06	2.1036e-05	1.31733e-06		1	0	0	46.4595	10.3178	16.0789	0	16.917	4.17734e-05	2.82089	0	0	2.68264e-06	1.43039e-05	-1.13612e-06
Lab 2	May 28, 2020	1	171	SRM 3169			0.0123217	0.00262247	0.00387507		0.00369289	1.36054e-05	0.000600274			1.65366e-06	1.63272e-05	-7.56042e-07			43.8588	9.74025	15.179		15.9703	3.24111e-05	2.6631			5.32928e-06	1.99901e-05	1.44741e-06		1	0	0	43.8465	9.73762	15.1752	0	15.9666	1.88057e-05	2.6625	0	0	3.67562e-06	3.66295e-06	2.20345e-06
Lab 2	May 28, 2020	1	174	bottle 3			0.0129111	0.00275276	0.00409917		0.00392486	1.73777e-05	0.000633565			4.74374e-06	1.12941e-05	5.68097e-06			47.3557	10.5166	16.3885		17.2422	3.15401e-05	2.8751			2.61255e-06	1.53615e-05	4.31999e-07		1	0	0	47.3428	10.5138	16.3844	0	17.2383	1.41624e-05	2.87446	0	0	-2.13119e-06	4.06747e-06	-5.24897e-06
Lab 2	May 28, 2020	1	177	SRM 3169			0.0133268	0.00284809	0.00424318		0.00407101	-3.23237e-07	0.000649317			6.05826e-06	2.06992e-05	5.65771e-06			44.5528	9.89422	15.419		16.2228	2.26829e-05	2.70523			5.58663e-06	2.96857e-05	8.37402e-06		1	0	0	44.5394	9.89138	15.4147	0	16.2187	2.30062e-05	2.70458	0	0	-4.71633e-07	8.98648e-06	2.71631e-06
Lab 2	May 28, 2020	1	180	bottle 4			0.0124288	0.00264605	0.00391627		0.00373585	9.79357e-06	0.000591384			3.41903e-06	1.22133e-05	-4.12099e-06			46.0492	10.2261	15.9356		16.7649	3.14404e-05	2.79542			-5.34705e-07	3.00794e-05	7.53871e-07		1	0	0	46.0367	10.2235	15.9317	0	16.7612	2.16468e-05	2.79483	0	0	-3.95373e-06	1.78661e-05	4.87486e-06
Lab 2	May 28, 2020	1	183	SRM 3169			0.012822	0.00272486	0.00404858		0.00387717	6.5622e-06	0.000621858			4.40112e-07	2.18624e-05	-2.58571e-07			44.5632	9.89655	15.4224		16.226	3.74992e-05	2.7057			3.84562e-06	9.31973e-06	2.16381e-06		1	0	0	44.5504	9.89383	15.4184	0	16.2222	3.0937e-05	2.70508	0	0	3.40551e-06	-1.25427e-05	2.42238e-06
Lab 2	May 28, 2020	1	186	bottle 5			0.0125054	0.00265006	0.00392698		0.00373914	6.72783e-06	0.000583315			3.98776e-06	-6.64234e-06	3.99335e-06			46.1642	10.2516	15.9751		16.8059	3.39619e-05	2.80213			9.95749e-06	3.61819e-06	3.63991e-06		1	0	0	46.1517	10.249	15.9711	0	16.8022	2.7234e-05	2.80155	0	0	5.96973e-06	1.02605e-05	-3.53438e-07
Lab 2	May 28, 2020	1	189	SRM 3169			0.0141647	0.0030261	0.0044871		0.00433431	4.14004e-06	0.00070254			4.23866e-06	1.74857e-05	-2.74534e-06			44.2946	9.83666	15.3287		16.1266	4.16251e-05	2.68895			-3.49401e-06	2.52744e-05	4.31863e-06		1	0	0	44.2805	9.83363	15.3242	0	16.1223	3.74851e-05	2.68824	0	0	-7.73267e-06	7.78871e-06	7.06396e-06
Lab 2	May 28, 2020	1	192	bottle 6			0.0137213	0.00293039	0.00433673		0.0041582	1.69995e-05	0.000666849			2.47509e-06	5.53035e-06	5.65987e-06			45.884	10.1892	15.8773		16.7023	2.37991e-05	2.78467			3.21802e-06	1.54588e-05	7.17093e-06		1	0	0	45.8703	10.1863	15.8729	0	16.6981	6.79959e-06	2.784	0	0	7.42925e-07	9.92842e-06	1.51106e-06
Lab 2	May 28, 2020	1	195	SRM 3169			0.0131941	0.00279696	0.00415456		0.00396669	9.83591e-06	0.000612121			3.19001e-06	2.3413e-05	-1.73876e-06			44.3701	9.85326	15.3542		16.1527	2.25018e-05	2.69319			-4.57824e-07	1.41759e-05	-6.75435e-07		1	0	0	44.3569	9.85046	15.35	0	16.1487	1.26659e-05	2.69258	0	0	-3.64783e-06	-9.23711e-06	1.06333e-06
Lab 2	May 28, 2020	1	198	bottle 1			0.0132331	0.00280409	0.00416126		0.00397026	-2.3378e-06	0.000618443			3.00018e-06	1.37081e-05	1.13242e-06			49.0187	10.8851	16.9616		17.8425	2.49862e-05	2.9747			4.98162e-06	1.47845e-05	9.23116e-07		1	0	0	49.0055	10.8823	16.9575	0	17.8385	2.7324e-05	2.97408	0	0	1.98144e-06	1.07642e-06	-2.09306e-07
Lab 2	May 28, 2020	1	201	SRM 3169			0.0129704	0.00275821	0.0040786		0.00387979	1.6703e-05	0.000602048			1.72037e-06	1.92965e-05	5.17692e-06			44.2896	9.8352	15.3259		16.1223	1.96055e-05	2.68801			3.22733e-06	2.19743e-05	6.01105e-06		1	0	0	44.2767	9.83244	15.3218	0	16.1184	2.90245e-06	2.68741	0	0	1.50697e-06	2.67786e-06	8.34132e-07
Lab 2	May 28, 2020	1	204	bottle 2			0.0132934	0.0028177	0.00417589		0.00398013	1.56637e-05	0.00064116			2.43919e-06	1.9407e-05	-6.95036e-07			47.7243	10.5977	16.5135		17.3707	3.78401e-05	2.89597			8.00733e-06	2.93616e-05	4.63961e-06		1	0	0	47.711	10.5949	16.5093	0	17.3667	2.21765e-05	2.89533	0	0	5.56814e-06	9.95455e-06	5.33465e-06
Lab 2	May 28, 2020	1	207	SRM 3169			0.0138133	0.00294535	0.00437		0.00417263	1.91601e-05	0.000662733			2.01478e-06	1.86854e-05	4.43742e-06			44.3403	9.8464	15.3431		16.1402	1.87431e-05	2.69096			-1.82289e-06	1.13352e-05	-1.80742e-06		1	0	0	44.3265	9.84346	15.3387	0	16.1361	-4.17048e-07	2.6903	0	0	-3.83767e-06	-7.35027e-06	-6.24484e-06
Lab 2	May 28, 2020	1	210	bottle 3			0.0135645	0.00288207	0.00426467		0.00406323	-2.77128e-06	0.000652878			4.57027e-06	9.37016e-06	2.59302e-07			48.1662	10.6955	16.6654		17.5296	2.76912e-05	2.92232			1.07487e-06	2.90041e-05	2.98656e-06		1	0	0	48.1526	10.6926	16.6612	0	17.5255	3.04625e-05	2.92166	0	0	-3.4954e-06	1.96339e-05	2.72725e-06
Lab 2	May 28, 2020	1	213	SRM 3169			0.0172025	0.00368901	0.00552536		0.00541206	1.6088e-05	0.000866006			6.78458e-06	1.80494e-05	-1.00444e-06			45.0221	9.99793	15.5795		16.3894	4.12744e-05	2.73259			-4.16665e-06	1.11266e-05	2.29266e-06		1	0	0	45.0049	9.99425	15.574	0	16.384	2.51864e-05	2.73172	0	0	-1.09512e-05	-6.92288e-06	3.2971e-06
Lab 2	May 28, 2020	1	216	bottle 4			0.0136627	0.00289614	0.00431372		0.00413375	1.04629e-05	0.000657558			4.16776e-06	2.45787e-05	2.00131e-06			47.0341	10.4446	16.2753		17.1207	2.98837e-05	2.8544			7.04473e-07	1.46856e-05	-5.91243e-07		1	0	0	47.0205	10.4417	16.2709	0	17.1165	1.94208e-05	2.85375	0	0	-3.46329e-06	-9.89314e-06	-2.59256e-06
Lab 2	May 28, 2020	1	219	SRM 3169			0.0136383	0.00290128	0.00432527		0.00412248	1.64329e-05	0.000654527			9.82409e-06	2.64516e-05	1.82407e-06			45.3116	10.0624	15.6804		16.4963	2.91259e-05	2.75054			-1.06559e-06	1.6684e-05	-1.65136e-06		1	0	0	45.2979	10.0595	15.6761	0	16.4921	1.2693e-05	2.74988	0	0	-1.08897e-05	-9.7676e-06	-3.47543e-06
Lab 2	May 28, 2020	1	222	bottle 5			0.0146327	0.00311953	0.00463581		0.00445136	1.48368e-05	0.000714379			-2.59754e-06	1.81159e-05	-2.74763e-06			47.8151	10.618	16.5457		17.4055	1.69854e-05	2.90201			3.92094e-06	1.43421e-06	4.94115e-06		1	0	0	47.8004	10.6149	16.5411	0	17.4011	2.14862e-06	2.90129	0	0	6.51848e-06	-1.66817e-05	7.68877e-06
Lab 2	May 28, 2020	1	225	SRM 3169			0.0133722	0.00285027	0.00419849		0.00401738	1.68345e-05	0.000634254			4.13373e-06	8.12016e-06	3.7643e-07			45.5624	10.1181	15.7672		16.5877	2.38015e-05	2.76583			9.80003e-06	2.19694e-05	7.92951e-07		1	0	0	45.549	10.1153	15.763	0	16.5837	6.96702e-06	2.7652	0	0	5.6663e-06	1.38492e-05	4.16521e-07
Lab 2	May 28, 2020	1	228	bottle 6			0.0174399	0.00375132	0.00562999		0.00548313	2.31829e-05	0.00088138			4.51631e-06	2.55581e-05	5.56469e-06			47.5097	10.5501	16.4398		17.2939	2.42761e-05	2.88334			2.23019e-06	1.1447e-05	-2.64906e-07		1	0	0	47.4922	10.5464	16.4342	0	17.2884	1.0932e-06	2.88246	0	0	-2.28612e-06	-1.41111e-05	-5.8296e-06
Lab 2	May 28, 2020	1	231	SRM 3169			0.0135116	0.00285735	0.00426508		0.00404439	1.47431e-05	0.000645641			-6.26325e-07	2.21002e-05	8.20684e-06			45.5563	10.1167	15.7648		16.5849	2.83788e-05	2.7653			-3.42248e-06	1.8603e-05	-1.58071e-06		1	0	0	45.5428	10.1139	15.7605	0	16.5809	1.36357e-05	2.76465	0	0	-2.79615e-06	-3.49721e-06	-9.78755e-06
Lab 2	May 28, 2020	1	234	bottle 1			0.0143732	0.00306495	0.00454154		0.00434977	1.03765e-05	0.000685287			6.29442e-06	9.49001e-06	2.94032e-06			48.5804	10.788	16.8105		17.6842	3.86306e-05	2.94846			2.74019e-06	1.91853e-05	1.15755e-06		1	0	0	48.5661	10.7849	16.806	0	17.6798	2.8254e-05	2.94777	0	0	-3.55423e-06	9.69525e-06	-1.78277e-06
Lab 2	May 28, 2020	1	237	SRM 3169			0.0137464	0.00291522	0.0043203		0.00412381	2.26105e-06	0.000656003			7.3067e-06	1.92797e-05	7.13147e-07			45.3775	10.0769	15.7026		16.5193	2.31396e-05	2.75432			3.13054e-06	2.9205e-05	4.85353e-06		1	0	0	45.3637	10.074	15.6983	0	16.5151	2.08785e-05	2.75366	0	0	-4.17616e-06	9.92524e-06	4.14039e-06
Lab 2	May 28, 2020	1	240	bottle 2			0.0138835	0.0029418	0.00436692		0.00418839	1.51696e-05	0.000662423			3.4057e-06	1.33949e-05	7.67733e-07			47.7449	10.6024	16.5213		17.3798	2.55532e-05	2.89767			-3.57978e-06	1.29633e-05	-1.29598e-06		1	0	0	47.731	10.5995	16.5169	0	17.3756	1.03836e-05	2.89701	0	0	-6.98548e-06	-4.31538e-07	-2.06371e-06
Lab 2	May 28, 2020	1	243	SRM 3169			0.0130159	0.00275832	0.00410929		0.00390844	2.26837e-05	0.00062856			7.40201e-06	1.52484e-05	-2.87055e-06			45.9567	10.205	15.902		16.7281	4.4165e-05	2.78904			-1.86858e-06	1.08354e-05	-5.3721e-07		1	0	0	45.9436	10.2023	15.8979	0	16.7242	2.14813e-05	2.78841	0	0	-9.27059e-06	-4.41306e-06	2.33334e-06
Lab 2	May 28, 2020	1	246	bottle 3			0.01304	0.0027625	0.00409676		0.00391588	1.7739e-05	0.000617058			-2.55129e-06	1.74642e-05	4.14561e-06			48.7319	10.8212	16.8621		17.738	2.32354e-05	2.95738			4.49321e-06	2.84571e-05	-4.79637e-06		1	0	0	48.7188	10.8184	16.858	0	17.734	5.49644e-06	2.95677	0	0	7.04451e-06	1.09929e-05	-8.94198e-06
Lab 2	May 28, 2020	1	249	SRM 3169			0.0133327	0.00284215	0.00419174		0.00399576	4.00231e-06	0.000630096			7.26403e-07	2.10211e-05	4.14456e-06			46.1823	10.2553	15.9805		16.8113	1.98418e-05	2.80302			1.69379e-06	2.01847e-05	-2.00042e-06		1	0	0	46.1689	10.2525	15.9763	0	16.8073	1.58395e-05	2.80239	0	0	9.67391e-07	-8.36395e-07	-6.14498e-06
Lab 2	May 28, 2020	1	252	bottle 4			0.0151195	0.0032353	0.00481843		0.00464511	2.23442e-06	0.000746353			2.38867e-06	3.13727e-05	4.34022e-06			48.1378	10.6892	16.6561		17.5207	3.21e-05	2.92105			-1.01991e-06	7.01807e-06	2.72037e-06		1	0	0	48.1227	10.686	16.6513	0	17.516	2.98656e-05	2.9203	0	0	-3.40859e-06	-2.43546e-05	-1.61984e-06
Lab 2	May 28, 2020	1	255	SRM 3169			0.0145513	0.0030973	0.00460727		0.00444207	1.32381e-05	0.000708785			1.15386e-06	2.71737e-06	2.92076e-07			46.2405	10.2684	16.0008		16.8325	3.78368e-05	2.80649			-7.21216e-08	1.76762e-05	1.81869e-06		1	0	0	46.2259	10.2653	15.9962	0	16.8281	2.45987e-05	2.80578	0	0	-1.22598e-06	1.49588e-05	1.52662e-06
Lab 2	May 28, 2020	1	258	bottle 5			0.0149466	0.00318086	0.00474869		0.00456376	2.38448e-06	0.000727572			-9.98801e-07	1.31876e-05	1.65699e-07			48.6473	10.8023	16.8324		17.706	2.68719e-05	2.95196			5.84089e-06	1.10275e-05	2.72711e-06		1	0	0	48.6323	10.7992	16.8276	0	17.7015	2.44874e-05	2.95123	0	0	6.83969e-06	-2.1601e-06	2.56141e-06
Lab 2	May 28, 2020	1	261	SRM 3169			0.0146292	0.00312533	0.0046268		0.00444767	8.52998e-06	0.000714441			5.82767e-06	1.42295e-05	2.1222e-06			46.4629	10.3176	16.0774		16.913	3.25052e-05	2.8199			4.19855e-06	1.67344e-05	-8.31177e-07		1	0	0	46.4483	10.3145	16.0728	0	16.9085	2.39752e-05	2.81919	0	0	-1.62912e-06	2.50492e-06	-2.95338e-06
Lab 2	May 28, 2020	1	264	bottle 6			0.0137665	0.00292928	0.00433741		0.00414382	1.39861e-05	0.000653099			4.34399e-06	1.25896e-05	-2.9262e-06			48.5088	10.7714	16.784		17.6548	4.09422e-05	2.94337			2.18434e-06	6.8118e-06	-4.12881e-06		1	0	0	48.495	10.7685	16.7797	0	17.6506	2.69561e-05	2.94272	0	0	-2.15964e-06	-5.7778e-06	-1.20261e-06
Lab 2	May 28, 2020	1	267	SRM 3169			0.0136861	0.00291512	0.00431671		0.0041137	7.95879e-06	0.000660184			6.45349e-06	6.23047e-06	7.97675e-06			46.4952	10.3245	16.0878		16.9232	2.45372e-05	2.82155			5.97447e-06	1.71244e-05	3.53039e-06		1	0	0	46.4815	10.3216	16.0835	0	16.9191	1.65784e-05	2.82089	0	0	-4.79022e-07	1.0894e-05	-4.44636e-06
Lab 2	June 3, 2020	2	68	SRM 3169			0.0103933	0.00221135	0.00327135		0.00310318	1.65186e-05	0.00050336			5.43537e-06	6.17616e-06	1.52939e-06			41.2112	9.14858	14.251		14.9823	2.67969e-05	2.49644			-8.57389e-07	1.07612e-05	5.37307e-06		1	0	0	41.2008	9.14637	14.2478	0	14.9792	1.02783e-05	2.49593	0	0	-6.29276e-06	4.58509e-06	3.84368e-06
Lab 2	June 3, 2020	2	71	SRM 3169			0.0107705	0.00229807	0.00339154		0.00322508	1.84398e-05	0.000521048			1.09821e-05	1.35734e-05	1.79492e-06			41.2662	9.16067	14.2696		15.0014	2.69758e-05	2.49956			7.80458e-06	9.68423e-06	-3.45886e-07		1	0	0	41.2554	9.15837	14.2662	0	14.9982	8.53599e-06	2.49904	0	0	-3.1775e-06	-3.88918e-06	-2.1408e-06
Lab 2	June 3, 2020	2	74	SRM 3169			0.0109147	0.00232459	0.00341547		0.00325698	-4.32374e-06	0.00051104			-1.37387e-06	2.18591e-05	-3.04792e-07			41.1853	9.14257	14.2414		14.9715	2.17613e-05	2.49454			1.09993e-06	4.26949e-06	6.12055e-07		1	0	0	41.1744	9.14025	14.2379	0	14.9682	2.60851e-05	2.49402	0	0	2.47379e-06	-1.75896e-05	9.16848e-07
Lab 2	June 3, 2020	2	77	Bottle 1			0.011145	0.00236556	0.00351432		0.00333222	2.0451e-06	0.000533495			-1.58478e-06	1.3938e-06	5.28519e-06			43.8075	9.72414	15.1465		15.9214	2.70982e-05	2.65254			-6.43839e-09	1.1232e-05	-3.91008e-06		1	0	0	43.7963	9.72178	15.1429	0	15.9181	2.50531e-05	2.652	0	0	1.57834e-06	9.83817e-06	-9.19528e-06
Lab 2	June 3, 2020	2	80	Bottle 2			0.0117279	0.00249562	0.00369601		0.00353672	9.38627e-06	0.000570908			6.73797e-06	2.00931e-05	-4.65128e-06			43.6731	9.6942	15.0994		15.8714	3.32703e-05	2.64412			2.74444e-06	-3.23025e-06	7.37483e-07		1	0	0	43.6613	9.6917	15.0957	0	15.8678	2.3884e-05	2.64355	0	0	-3.99353e-06	-2.33234e-05	5.38876e-06
Lab 2	June 3, 2020	2	83	Bottle 3			0.0124607	0.00265831	0.00396686		0.00378825	1.12361e-05	0.000603191			3.54917e-06	1.72245e-05	-4.52363e-06			43.2931	9.60949	14.9671		15.7314	2.0886e-05	2.62068			5.8395e-06	2.06768e-05	8.7369e-07		1	0	0	43.2806	9.60683	14.9632	0	15.7276	9.64998e-06	2.62008	0	0	2.29033e-06	3.4523e-06	5.39732e-06
Lab 2	June 3, 2020	2	86	Bottle 4			0.0126547	0.0026905	0.00402502		0.00383593	-6.51318e-07	0.000611236			5.11478e-06	1.04535e-05	1.26033e-06			43.8566	9.73438	15.1614		15.9349	2.38158e-05	2.65447			-1.98748e-06	1.63757e-05	5.74564e-06		1	0	0	43.8439	9.73169	15.1573	0	15.9311	2.44671e-05	2.65386	0	0	-7.10226e-06	5.92215e-06	4.48531e-06
Lab 2	June 3, 2020	2	89	Bottle 5			0.0110496	0.00233777	0.00350299		0.003332	8.79071e-06	0.000531257			3.74409e-07	9.06416e-06	1.59291e-06			43.2136	9.59026	14.9348		15.6926	3.07933e-05	2.61348			3.69222e-06	1.35057e-05	1.75048e-06		1	0	0	43.2026	9.58792	14.9313	0	15.6892	2.20026e-05	2.61295	0	0	3.31781e-06	4.44159e-06	1.57564e-07
Lab 2	June 3, 2020	2	92	Bottle 6			0.0127727	0.00271424	0.00403395		0.00384523	1.75785e-05	0.000621815			1.06691e-06	1.50327e-05	4.56215e-06			43.9749	9.76058	15.2022		15.9778	1.63367e-05	2.66159			2.66399e-06	2.51785e-06	4.6132e-06		1	0	0	43.9621	9.75786	15.1981	0	15.974	-1.24179e-06	2.66097	0	0	1.59707e-06	-1.25148e-05	5.10504e-08
Lab 2	June 3, 2020	2	95	SRM 3169			0.013534	0.00288952	0.00430069		0.0040998	5.47047e-06	0.000644187			3.38954e-07	1.49576e-07	7.20924e-06			41.7588	9.26934	14.4378		15.1763	3.35569e-05	2.52838			-7.63041e-07	2.4754e-05	3.06458e-06		1	0	0	41.7453	9.26646	14.4335	0	15.1722	2.80864e-05	2.52773	0	0	-1.102e-06	2.46045e-05	-4.14465e-06
Lab 2	June 3, 2020	2	98	bottle 1			0.0133707	0.00284439	0.00425018		0.00406281	2.74975e-06	0.000647529			-2.34772e-06	8.85172e-06	1.44073e-06			44.7681	9.93665	15.4762		16.2656	3.28751e-05	2.7095			4.49889e-06	1.38077e-05	2.41483e-06		1	0	0	44.7547	9.9338	15.4719	0	16.2615	3.01254e-05	2.70885	0	0	6.8466e-06	4.95595e-06	9.74103e-07
Lab 2	June 3, 2020	2	101	bottle 2			0.0128029	0.00271025	0.00403856		0.00383978	1.32397e-05	0.000600471			-3.26196e-07	1.47878e-05	-3.38238e-06			44.5099	9.87926	15.3867		16.1712	2.96576e-05	2.69375			6.79723e-06	-3.32099e-06	-1.37468e-06		1	0	0	44.4971	9.87654	15.3826	0	16.1673	1.64179e-05	2.69315	0	0	7.12343e-06	-1.81087e-05	2.0077e-06
Lab 2	June 3, 2020	2	104	bottle 3			0.0136995	0.00293076	0.00435712		0.00416882	1.12336e-05	0.00064232			1.0621e-06	1.05788e-06	1.05502e-06			43.9922	9.7642	15.2074		15.9825	1.96907e-05	2.66227			6.682e-07	1.86057e-05	2.16145e-06		1	0	0	43.9785	9.76127	15.203	0	15.9784	8.45708e-06	2.66163	0	0	-3.939e-07	1.75478e-05	1.10643e-06
Lab 2	June 3, 2020	2	107	bottle 4			0.0126778	0.00271491	0.00405157		0.00388	1.8359e-05	0.000627499			2.58811e-06	1.06578e-05	2.93626e-06			43.8744	9.73685	15.163		15.9322	4.06765e-05	2.65334			-4.2445e-06	1.16311e-05	4.15475e-06		1	0	0	43.8617	9.73413	15.1589	0	15.9283	2.23175e-05	2.65271	0	0	-6.83261e-06	9.73311e-07	1.21849e-06
Lab 2	June 3, 2020	2	110	bottle 5			0.013915	0.00296989	0.004419		0.00425572	1.17186e-05	0.000673991			-1.26201e-10	1.42032e-05	4.71761e-06			44.4868	9.87327	15.3763		16.158	2.84585e-05	2.69122			2.26611e-06	1.66409e-05	2.82801e-06		1	0	0	44.4728	9.8703	15.3719	0	16.1538	1.67398e-05	2.69054	0	0	2.26624e-06	2.43769e-06	-1.88959e-06
Lab 2	June 3, 2020	2	113	bottle 6			0.0131417	0.0027878	0.00412742		0.00392386	2.00899e-05	0.000620014			1.33897e-06	1.42216e-05	-3.57484e-07			44.4724	9.87063	15.373		16.156	2.73489e-05	2.69109			5.82664e-06	2.19985e-05	-1.82873e-06		1	0	0	44.4593	9.86784	15.3689	0	16.1521	7.25895e-06	2.69047	0	0	4.48767e-06	7.77692e-06	-1.47124e-06
Lab 2	June 3, 2020	2	116	SRM 3169			0.0169507	0.00364274	0.00544556		0.0053085	1.43024e-05	0.000849029			2.7637e-06	9.91574e-06	-1.17536e-06			41.8989	9.3003	14.4857		15.2261	2.87347e-05	2.53658			4.19794e-06	1.95956e-05	3.8143e-06		1	0	0	41.8819	9.29666	14.4803	0	15.2208	1.44323e-05	2.53573	0	0	1.43423e-06	9.67986e-06	4.98966e-06
Lab 2	June 3, 2020	2	119	bottle 1			0.0143472	0.0030437	0.00453719		0.00433681	7.75262e-06	0.000691586			7.41269e-06	1.99002e-05	1.01636e-05			45.3222	10.0596	15.6676		16.4665	2.4046e-05	2.74291			-3.27045e-06	8.56615e-06	6.65442e-06		1	0	0	45.3079	10.0566	15.663	0	16.4622	1.62934e-05	2.74222	0	0	-1.06831e-05	-1.13341e-05	-3.50922e-06
Lab 2	June 3, 2020	2	122	bottle 2			0.0138582	0.00294092	0.00436285		0.00413879	1.31945e-05	0.000642779			5.56051e-07	6.78525e-06	-2.89798e-06			44.851	9.95514	15.5051		16.2961	2.36368e-05	2.71459			-1.57839e-06	2.71609e-05	2.33102e-06		1	0	0	44.8371	9.9522	15.5007	0	16.2919	1.04423e-05	2.71395	0	0	-2.13444e-06	2.03756e-05	5.22901e-06
Lab 2	June 3, 2020	2	125	bottle 3			0.0137494	0.00291146	0.00432476		0.00410277	6.94227e-06	0.000638025			1.23678e-06	-1.26775e-06	1.95099e-06			44.4776	9.87191	15.3751		16.1585	3.55968e-05	2.69156			2.03644e-06	8.24014e-06	2.75784e-06		1	0	0	44.4639	9.869	15.3707	0	16.1544	2.86546e-05	2.69093	0	0	7.99663e-07	9.50789e-06	8.06845e-07
Lab 2	June 3, 2020	2	128	bottle 4			0.0140787	0.00299098	0.00444059		0.00423193	9.92279e-06	0.000656795			1.83333e-06	1.03875e-05	-6.70596e-07			44.5259	9.88256	15.3917		16.1758	3.20268e-05	2.69435			2.33525e-06	1.2897e-05	2.44486e-06		1	0	0	44.5119	9.87957	15.3872	0	16.1716	2.2104e-05	2.6937	0	0	5.01928e-07	2.50946e-06	3.11546e-06
Lab 2	June 3, 2020	2	131	bottle 5			0.0163198	0.00348369	0.00521451		0.00501057	3.69864e-06	0.000790098			4.28152e-06	6.4511e-06	2.62091e-06			44.8437	9.95283	15.5006		16.2894	2.25863e-05	2.7132			4.76198e-07	1.38283e-05	-5.55677e-06		1	0	0	44.8274	9.94935	15.4954	0	16.2844	1.88877e-05	2.71241	0	0	-3.80532e-06	7.37723e-06	-8.17769e-06
Lab 2	June 3, 2020	2	134	bottle 6			0.0146821	0.0031322	0.00463586		0.00442202	1.7239e-05	0.000688576			8.60447e-06	1.09541e-05	3.54615e-07			44.8184	9.94722	15.4918		16.28	3.11787e-05	2.7116			5.35004e-07	2.90608e-06	2.98968e-06		1	0	0	44.8038	9.94409	15.4872	0	16.2756	1.39397e-05	2.71091	0	0	-8.06946e-06	-8.04799e-06	2.63506e-06
Lab 2	June 3, 2020	2	137	SRM 3169			0.0144334	0.00305995	0.00454977		0.00433432	-8.78783e-06	0.000675029			-1.75876e-06	8.29984e-07	3.25352e-06			42.2753	9.38342	14.6147		15.3603	3.41656e-05	2.55871			4.70347e-06	7.41512e-06	8.35358e-07		1	0	0	42.2608	9.38036	14.6101	0	15.3559	4.29534e-05	2.55804	0	0	6.46223e-06	6.58513e-06	-2.41816e-06
Lab 2	June 3, 2020	2	140	bottle 1			0.0146877	0.003117	0.00463427		0.00440992	5.0299e-06	0.000696493			3.83679e-06	1.13248e-05	1.47195e-06			46.0632	10.2231	15.9211		16.7302	2.41409e-05	2.78644			2.76681e-06	4.37914e-06	-3.56766e-06		1	0	0	46.0485	10.22	15.9165	0	16.7258	1.9111e-05	2.78574	0	0	-1.06998e-06	-6.94567e-06	-5.03961e-06
Lab 2	June 3, 2020	2	143	bottle 2			0.0142461	0.00304026	0.00449531		0.00426757	1.04248e-05	0.000674622			-4.26725e-06	1.12748e-05	4.55426e-06			45.832	10.1718	15.841		16.6459	3.12834e-05	2.77239			-3.38433e-06	1.62466e-05	5.65679e-06		1	0	0	45.8178	10.1687	15.8365	0	16.6416	2.08585e-05	2.77172	0	0	8.82924e-07	4.97176e-06	1.10253e-06
Lab 2	June 3, 2020	2	146	bottle 3			0.0139467	0.00296047	0.00438543		0.00416326	1.61315e-05	0.000646019			3.62314e-06	1.41528e-05	2.08726e-06			45.2217	10.0363	15.6299		16.4238	3.82115e-05	2.73538			-2.1195e-06	1.96403e-05	-4.04303e-06		1	0	0	45.2078	10.0333	15.6255	0	16.4197	2.208e-05	2.73474	0	0	-5.74263e-06	5.48756e-06	-6.1303e-06
Lab 2	June 3, 2020	2	149	bottle 4			0.0139056	0.00295193	0.00436608		0.00415629	9.83199e-06	0.000675695			4.16971e-07	4.31306e-06	8.23089e-06			44.9231	9.97035	15.5275		16.3171	4.14792e-05	2.71772			4.06454e-06	1.0513e-05	-7.49761e-07		1	0	0	44.9092	9.9674	15.5231	0	16.3129	3.16472e-05	2.71705	0	0	3.64757e-06	6.19998e-06	-8.98065e-06
Lab 2	June 3, 2020	2	152	bottle 5			0.0151384	0.0032339	0.00481177		0.00458877	6.86692e-06	0.000720834			6.81748e-07	1.8305e-05	1.68556e-07			45.2037	10.0321	15.6231		16.4163	3.19112e-05	2.73404			4.98021e-06	1.54385e-05	2.13603e-06		1	0	0	45.1885	10.0289	15.6183	0	16.4117	2.50443e-05	2.73332	0	0	4.29847e-06	-2.86656e-06	1.96747e-06
Lab 2	June 3, 2020	2	155	bottle 6			0.0147235	0.00312487	0.00463432		0.00442289	5.913e-06	0.000700464			3.28718e-06	7.96708e-06	6.07558e-06			45.1026	10.01	15.5893		16.3817	1.93881e-05	2.72841			4.10355e-06	1.22311e-05	7.75433e-08		1	0	0	45.0879	10.0069	15.5846	0	16.3773	1.34751e-05	2.72771	0	0	8.16367e-07	4.26401e-06	-5.99803e-06
Lab 2	June 3, 2020	2	158	SRM 3169			0.0177938	0.00381154	0.00569752		0.00551556	1.70045e-05	0.00086238			1.41494e-06	5.79019e-06	1.00735e-05			42.546	9.44319	14.7073		15.4568	2.80983e-05	2.57469			-1.41189e-07	1.87231e-05	1.10927e-06		1	0	0	42.5282	9.43938	14.7016	0	15.4513	1.10938e-05	2.57383	0	0	-1.55613e-06	1.29329e-05	-8.96424e-06
Lab 2	June 3, 2020	2	161	bottle 1			0.0150612	0.00319736	0.00473477		0.00450243	2.11495e-06	0.000709642			6.79291e-06	1.33975e-05	-6.2842e-06			46.4309	10.3051	16.0491		16.8655	4.38748e-05	2.8091			9.78087e-08	8.36143e-06	3.81272e-06		1	0	0	46.4158	10.3019	16.0444	0	16.861	4.17599e-05	2.80839	0	0	-6.6951e-06	-5.03608e-06	1.00969e-05
Lab 2	June 3, 2020	2	164	bottle 2			0.0150689	0.00320995	0.00472841		0.00449452	1.18137e-05	0.000692902			2.70613e-06	1.82009e-05	1.67365e-08			46.0909	10.2298	15.932		16.743	2.52932e-05	2.78874			3.62873e-06	1.59854e-05	3.19392e-06		1	0	0	46.0759	10.2265	15.9273	0	16.7385	1.34795e-05	2.78805	0	0	9.226e-07	-2.2155e-06	3.17719e-06
Lab 2	June 3, 2020	2	167	bottle 3			0.0151311	0.00321985	0.004749		0.00451016	4.99629e-06	0.000683898			1.58015e-06	2.90779e-06	3.89471e-06			45.5044	10.0995	15.7289		16.5293	3.9042e-05	2.7531			5.35669e-06	1.7175e-05	-4.53914e-06		1	0	0	45.4893	10.0963	15.7242	0	16.5248	3.40457e-05	2.75242	0	0	3.77655e-06	1.42672e-05	-8.43385e-06
Lab 2	June 3, 2020	2	170	bottle 4			0.0164267	0.00350481	0.00520958		0.00498062	1.37777e-06	0.000797624			1.0106e-06	1.08142e-05	5.43045e-07			45.2073	10.0333	15.6258		16.4203	3.20258e-05	2.73488			-1.16192e-06	2.04066e-05	2.7187e-06		1	0	0	45.1909	10.0298	15.6205	0	16.4153	3.0648e-05	2.73408	0	0	-2.17252e-06	9.59242e-06	2.17566e-06
Lab 2	June 3, 2020	2	173	bottle 5			0.016564	0.00353469	0.00525171		0.00503343	1.74025e-05	0.000786632			3.15151e-06	1.56471e-05	-1.26964e-06			45.4907	10.0962	15.7234		16.5226	3.96424e-05	2.75186			-4.73855e-08	1.39087e-05	-1.003e-06		1	0	0	45.4741	10.0927	15.7182	0	16.5176	2.22398e-05	2.75107	0	0	-3.19889e-06	-1.73843e-06	2.6664e-07
Lab 2	June 3, 2020	2	176	bottle 6			0.0153556	0.00326029	0.00483398		0.00458127	3.80764e-06	0.000706826			2.57288e-06	6.92791e-06	5.67715e-07			45.5936	10.1187	15.7578		16.5577	2.13768e-05	2.75753			-1.66626e-07	5.36403e-06	2.90019e-07		1	0	0	45.5782	10.1154	15.753	0	16.5531	1.75692e-05	2.75682	0	0	-2.73951e-06	-1.56388e-06	-2.77696e-07
Lab 2	June 3, 2020	2	179	SRM 3169			0.0150882	0.0032071	0.00473775		0.00449279	4.03597e-06	0.000689609			3.15193e-06	5.1291e-06	2.92808e-06			42.8212	9.50402	14.8017		15.5551	4.20598e-05	2.59092			2.44838e-06	8.97709e-06	-1.88411e-07		1	0	0	42.8061	9.50081	14.7969	0	15.5506	3.80239e-05	2.59023	0	0	-7.03552e-07	3.84799e-06	-3.1165e-06
Lab 2	June 3, 2020	2	182	bottle 1			0.0239592	0.00515694	0.00780168		0.0076998	-1.20307e-06	0.00123909			3.4735e-07	1.39922e-05	1.908e-06			47.1667	10.4681	16.3023		17.1307	2.25369e-05	2.85309			2.61717e-06	8.8051e-06	-4.027e-06		1	0	0	47.1428	10.4629	16.2945	0	17.123	2.37399e-05	2.85185	0	0	2.26982e-06	-5.18708e-06	-5.935e-06
Lab 2	June 3, 2020	2	185	bottle 2			0.0174808	0.00372269	0.00555402		0.00534089	-7.27244e-07	0.00084628			-2.5413e-06	3.28097e-06	8.23793e-07			46.9561	10.4212	16.2295		17.054	4.4988e-05	2.8403			2.65048e-07	1.67826e-05	-3.80217e-06		1	0	0	46.9386	10.4175	16.224	0	17.0486	4.57152e-05	2.83946	0	0	2.80635e-06	1.35017e-05	-4.62596e-06
Lab 2	June 3, 2020	2	188	bottle 3			0.0157897	0.00337018	0.00497829		0.00471839	4.49262e-06	0.000732133			1.24484e-06	2.25119e-06	6.64727e-08			46.3225	10.2806	16.0102		16.8234	2.29404e-05	2.80183			2.0213e-06	1.61133e-05	6.29839e-06		1	0	0	46.3067	10.2772	16.0052	0	16.8187	1.84478e-05	2.8011	0	0	7.76458e-07	1.38621e-05	6.23192e-06
Lab 2	June 3, 2020	2	191	bottle 4			0.0166938	0.00354946	0.00528945		0.00506018	2.94175e-05	0.000794591			2.03206e-06	1.52065e-05	-2.52436e-07			45.0926	10.006	15.5803		16.367	3.05079e-05	2.72515			4.809e-06	8.34371e-06	1.82669e-06		1	0	0	45.0759	10.0024	15.575	0	16.3619	1.0904e-06	2.72436	0	0	2.77694e-06	-6.86275e-06	2.07913e-06
Lab 2	June 3, 2020	2	194	bottle 5			0.0161435	0.00345017	0.00511569		0.00490275	1.65153e-05	0.000775487			4.754e-06	4.09111e-06	-9.49962e-07			46.0017	10.2085	15.8967		16.7015	2.10098e-05	2.78121			1.32492e-06	9.20045e-06	2.22491e-06		1	0	0	45.9855	10.205	15.8916	0	16.6966	4.49457e-06	2.78043	0	0	-3.42908e-06	5.10934e-06	3.17487e-06
Lab 2	June 3, 2020	2	197	bottle 6			0.0182519	0.00389843	0.00583316		0.00563314	2.55284e-06	0.000885485			3.47845e-06	9.02604e-06	-9.91469e-07			46.0437	10.2179	15.9115		16.7174	2.15943e-05	2.78384			2.38356e-06	2.59537e-05	2.48698e-06		1	0	0	46.0254	10.214	15.9057	0	16.7117	1.90414e-05	2.78295	0	0	-1.09489e-06	1.69277e-05	3.47845e-06
Lab 2	June 3, 2020	2	200	SRM 3169			0.0156365	0.00330832	0.00492993		0.00469166	1.50263e-05	0.000742216			4.13359e-06	1.39693e-05	6.28511e-06			43.2773	9.60435	14.9567		15.7153	4.2099e-05	2.61721			2.58599e-06	1.67293e-05	5.52777e-06		1	0	0	43.2617	9.60104	14.9518	0	15.7107	2.70727e-05	2.61646	0	0	-1.5476e-06	2.75992e-06	-7.57341e-07
Lab 3	Feb 4, 2020	1	2	STD	0.000149709	2.04897e-05	0.000634476	0.00014659	0.000343201		0.00037492		0.000249744						-1.74424e-06	-2.63824e-06	29.9579	6.66349	10.3972		10.9688		1.83356							1	-0.000151453	-2.31279e-05	29.9573	6.66334	10.3968	0	10.9684	0	1.83331	0	0	0	0	0
Lab 3	Feb 4, 2020	1	3	iRM4	0.000149709	2.04897e-05	0.000634476	0.00014659	0.000343201		0.00037492		0.000249744						5.57468e-05	2.94561e-05	29.8408	6.6375	10.3568		10.9265		1.82653							1	-9.39617e-05	8.96643e-06	29.8401	6.63735	10.3564	0	10.9261	0	1.82628	0	0	0	0	0
Lab 3	Feb 4, 2020	1	4	STD	0.000149709	2.04897e-05	0.000634476	0.00014659	0.000343201		0.00037492		0.000249744						5.97783e-05	1.17891e-05	29.57	6.57739	10.2632		10.828		1.81014							1	-8.99302e-05	-8.70051e-06	29.5694	6.57724	10.2628	0	10.8276	0	1.80989	0	0	0	0	0
Lab 3	Feb 4, 2020	1	5	iRM5	0.000149709	2.04897e-05	0.000634476	0.00014659	0.000343201		0.00037492		0.000249744						-9.61207e-06	-8.37398e-06	29.4063	6.54102	10.2063		10.7684		1.80017							1	-0.000159321	-2.88636e-05	29.4056	6.54087	10.206	0	10.768	0	1.79992	0	0	0	0	0
Lab 3	Feb 4, 2020	1	6	STD	0.000149709	2.04897e-05	0.000634476	0.00014659	0.000343201		0.00037492		0.000249744						4.51605e-05	1.11085e-05	29.5494	6.57291	10.2563		10.8211		1.80901							1	-0.000104548	-9.38112e-06	29.5488	6.57276	10.2559	0	10.8207	0	1.80876	0	0	0	0	0
Lab 3	Feb 4, 2020	1	7	iRM6	0.000149709	2.04897e-05	0.000634476	0.00014659	0.000343201		0.00037492		0.000249744						1.15494e-05	9.85359e-06	29.1802	6.49087	10.1284		10.6866		1.78655							1	-0.000138159	-1.06361e-05	29.1796	6.49072	10.1281	0	10.6862	0	1.7863	0	0	0	0	0
Lab 3	Feb 4, 2020	1	8	STD	0.000149709	2.04897e-05	0.000634476	0.00014659	0.000343201		0.00037492		0.000249744						7.94638e-06	9.35431e-06	29.5193	6.56645	10.2463		10.8111		1.80741							1	-0.000141762	-1.11354e-05	29.5186	6.5663	10.246	0	10.8107	0	1.80716	0	0	0	0	0
Lab 3	Feb 4, 2020	1	9	iRM4	0.000149709	2.04897e-05	0.000634476	0.00014659	0.000343201		0.00037492		0.000249744						5.97296e-05	3.06023e-05	29.4293	6.54637	10.2153		10.7785		1.80201							1	-8.99789e-05	1.01127e-05	29.4287	6.54623	10.2149	0	10.7782	0	1.80176	0	0	0	0	0
Lab 3	Feb 4, 2020	1	10	STD	0.000149709	2.04897e-05	0.000634476	0.00014659	0.000343201		0.00037492		0.000249744						9.29131e-05	-2.74987e-06	29.3979	6.53951	10.2045		10.7675		1.80019							1	-5.67955e-05	-2.32395e-05	29.3973	6.53937	10.2041	0	10.7671	0	1.79994	0	0	0	0	0
Lab 3	Feb 4, 2020	1	11	iRM5	0.000149709	2.04897e-05	0.000634476	0.00014659	0.000343201		0.00037492		0.000249744						1.66949e-05	7.1226e-06	29.2239	6.50088	10.1445		10.7045		1.78968							1	-0.000133014	-1.33671e-05	29.2233	6.50074	10.1442	0	10.7041	0	1.78943	0	0	0	0	0
Lab 3	Feb 4, 2020	1	12	STD	0.000149709	2.04897e-05	0.000634476	0.00014659	0.000343201		0.00037492		0.000249744						3.19713e-05	-1.39554e-05	29.2898	6.51557	10.1675		10.729		1.79386							1	-0.000117737	-3.4445e-05	29.2892	6.51542	10.1672	0	10.7287	0	1.79361	0	0	0	0	0
Lab 3	Feb 4, 2020	1	13	iRM6	0.000149709	2.04897e-05	0.000634476	0.00014659	0.000343201		0.00037492		0.000249744						3.87871e-05	5.25309e-06	28.9805	6.4469	10.0605		10.6164		1.77508							1	-0.000110921	-1.52366e-05	28.9799	6.44676	10.0602	0	10.6161	0	1.77483	0	0	0	0	0
Lab 3	Feb 4, 2020	1	14	STD	0.000149709	2.04897e-05	0.000634476	0.00014659	0.000343201		0.00037492		0.000249744						2.64281e-05	2.964e-06	29.537	6.5708	10.254		10.8208		1.80928							1	-0.00012328	-1.75257e-05	29.5364	6.57065	10.2537	0	10.8204	0	1.80903	0	0	0	0	0
Lab 3	Feb 4, 2020	1	15	iRM4	0.000149709	2.04897e-05	0.000634476	0.00014659	0.000343201		0.00037492		0.000249744						4.31581e-05	1.51566e-06	29.422	6.54533	10.2143		10.7793		1.8024							1	-0.00010655	-1.8974e-05	29.4214	6.54518	10.2139	0	10.7789	0	1.80215	0	0	0	0	0
Lab 3	Feb 4, 2020	1	16	STD	0.000149709	2.04897e-05	0.000634476	0.00014659	0.000343201		0.00037492		0.000249744						3.46993e-05	-3.58419e-05	29.0296	6.45806	10.0784		10.6361		1.77848							1	-0.000115009	-5.63315e-05	29.0289	6.45791	10.0781	0	10.6357	0	1.77823	0	0	0	0	0
Lab 3	Feb 4, 2020	1	17	iRM5	0.000149709	2.04897e-05	0.000634476	0.00014659	0.000343201		0.00037492		0.000249744						5.38898e-05	1.66845e-05	28.9952	6.45058	10.0668		10.6243		1.77662							1	-9.58187e-05	-3.80516e-06	28.9946	6.45043	10.0665	0	10.6239	0	1.77637	0	0	0	0	0
Lab 3	Feb 4, 2020	1	18	STD	0.000149709	2.04897e-05	0.000634476	0.00014659	0.000343201		0.00037492		0.000249744						4.37814e-05	-1.00642e-05	29.1885	6.49363	10.1341		10.6955		1.78855							1	-0.000105927	-3.05539e-05	29.1878	6.49348	10.1337	0	10.6952	0	1.7883	0	0	0	0	0
Lab 3	Feb 4, 2020	1	19	iRM6	0.000149709	2.04897e-05	0.000634476	0.00014659	0.000343201		0.00037492		0.000249744						2.53784e-06	-2.14711e-05	29.0032	6.45245	10.07		10.6282		1.77734							1	-0.000147171	-4.19608e-05	29.0026	6.4523	10.0697	0	10.6278	0	1.77709	0	0	0	0	0
Lab 3	Feb 4, 2020	1	20	STD	0.000149709	2.04897e-05	0.000634476	0.00014659	0.000343201		0.00037492		0.000249744						9.76946e-06	2.06327e-05	29.3327	6.52587	10.1847		10.7495		1.79765							1	-0.000139939	1.43026e-07	29.3321	6.52572	10.1844	0	10.7491	0	1.7974	0	0	0	0	0
Lab 3	Feb 4, 2020	1	21	iRM4	0.000149709	2.04897e-05	0.000634476	0.00014659	0.000343201		0.00037492		0.000249744						3.87992e-05	-1.17809e-05	29.3264	6.52464	10.1829		10.7479		1.79739							1	-0.000110909	-3.22705e-05	29.3257	6.52449	10.1825	0	10.7476	0	1.79714	0	0	0	0	0
Lab 3	Feb 4, 2020	1	22	STD	0.000149709	2.04897e-05	0.000634476	0.00014659	0.000343201		0.00037492		0.000249744						9.67412e-05	-1.32228e-05	29.0379	6.46049	10.0829		10.6427		1.77988							1	-5.29673e-05	-3.37124e-05	29.0373	6.46034	10.0826	0	10.6424	0	1.77963	0	0	0	0	0
Lab 3	Feb 4, 2020	1	23	iRM5	0.000149709	2.04897e-05	0.000634476	0.00014659	0.000343201		0.00037492		0.000249744						1.03971e-05	-2.0392e-05	28.9111	6.43245	10.0393		10.5969		1.77229							1	-0.000139311	-4.08817e-05	28.9105	6.4323	10.0389	0	10.5966	0	1.77204	0	0	0	0	0
Lab 3	Feb 4, 2020	1	24	STD	0.000149709	2.04897e-05	0.000634476	0.00014659	0.000343201		0.00037492		0.000249744						4.73185e-05	5.93612e-06	29.1839	6.49313	10.1343		10.6974		1.78912							1	-0.00010239	-1.45535e-05	29.1833	6.49298	10.1339	0	10.697	0	1.78887	0	0	0	0	0
Lab 3	Feb 4, 2020	1	25	iRM6	0.000149709	2.04897e-05	0.000634476	0.00014659	0.000343201		0.00037492		0.000249744						2.71082e-05	-7.69259e-06	28.5315	6.34809	9.90793		10.4588		1.74928							1	-0.0001226	-2.81823e-05	28.5309	6.34794	9.90758	0	10.4585	0	1.74903	0	0	0	0	0
Lab 3	Feb 4, 2020	1	26	STD	0.000149709	2.04897e-05	0.000634476	0.00014659	0.000343201		0.00037492		0.000249744						1.54049e-05	-5.88817e-07	28.8908	6.42809	10.0329		10.5909		1.77141							1	-0.000134304	-2.10785e-05	28.8902	6.42794	10.0326	0	10.5905	0	1.77116	0	0	0	0	0
Lab 3	Feb 4, 2020	1	27	iRM4	0.000149709	2.04897e-05	0.000634476	0.00014659	0.000343201		0.00037492		0.000249744						4.93102e-05	-2.73654e-05	28.9276	6.43628	10.0458		10.6047		1.77373							1	-0.000100398	-4.78551e-05	28.927	6.43613	10.0455	0	10.6044	0	1.77348	0	0	0	0	0
Lab 3	Feb 4, 2020	1	28	STD	0.000149709	2.04897e-05	0.000634476	0.00014659	0.000343201		0.00037492		0.000249744						8.06083e-05	-1.2971e-05	28.9524	6.4419	10.0547		10.6144		1.77539							1	-6.91002e-05	-3.34607e-05	28.9517	6.44176	10.0543	0	10.6141	0	1.77514	0	0	0	0	0
Lab 3	Feb 4, 2020	1	29	iRM5	0.000149709	2.04897e-05	0.000634476	0.00014659	0.000343201		0.00037492		0.000249744						9.00064e-07	2.06706e-05	28.8829	6.42651	10.0309		10.5896		1.7713							1	-0.000148808	1.80948e-07	28.8823	6.42636	10.0305	0	10.5892	0	1.77105	0	0	0	0	0
Lab 3	Feb 4, 2020	1	30	STD	0.000149709	2.04897e-05	0.000634476	0.00014659	0.000343201		0.00037492		0.000249744						3.87272e-05	-7.18965e-06	28.9179	6.43443	10.0434		10.603		1.77359							1	-0.000110981	-2.76793e-05	28.9173	6.43428	10.043	0	10.6026	0	1.77334	0	0	0	0	0
Lab 3	Feb 4, 2020	1	31	iRM6	0.000149709	2.04897e-05	0.000634476	0.00014659	0.000343201		0.00037492		0.000249744						-7.39414e-06	-3.50912e-07	28.6568	6.37639	9.95287		10.5077		1.75768							1	-0.000157103	-2.08406e-05	28.6562	6.37624	9.95253	0	10.5073	0	1.75743	0	0	0	0	0
Lab 3	Feb 4, 2020	1	32	STD	0.000149709	2.04897e-05	0.000634476	0.00014659	0.000343201		0.00037492		0.000249744						3.04755e-07	-8.71292e-07	28.9759	6.44753	10.0641		10.6254		1.77744							1	-0.000149404	-2.1361e-05	28.9752	6.44738	10.0637	0	10.625	0	1.77719	0	0	0	0	0
Lab 3	Feb 4, 2020	1	33	iRM4	0.000149709	2.04897e-05	0.000634476	0.00014659	0.000343201		0.00037492		0.000249744						5.39877e-05	-1.22163e-05	29.0238	6.45833	10.081		10.6436		1.78056							1	-9.57209e-05	-3.27059e-05	29.0232	6.45818	10.0807	0	10.6433	0	1.78031	0	0	0	0	0
Lab 3	Feb 4, 2020	1	34	STD	0.000149709	2.04897e-05	0.000634476	0.00014659	0.000343201		0.00037492		0.000249744						6.13435e-05	-3.70261e-05	28.8263	6.41446	10.0127		10.5718		1.76863							1	-8.8365e-05	-5.75158e-05	28.8256	6.41431	10.0123	0	10.5715	0	1.76838	0	0	0	0	0
Lab 3	Feb 4, 2020	1	35	iRM5	0.000149709	2.04897e-05	0.000634476	0.00014659	0.000343201		0.00037492		0.000249744						2.39688e-05	-4.46623e-06	28.8321	6.4158	10.015		10.5746		1.76909							1	-0.00012574	-2.49559e-05	28.8315	6.41566	10.0146	0	10.5742	0	1.76884	0	0	0	0	0
Lab 3	Feb 4, 2020	1	36	STD	0.000149709	2.04897e-05	0.000634476	0.00014659	0.000343201		0.00037492		0.000249744						5.69494e-05	-6.45718e-06	29.0055	6.45447	10.0755		10.6388		1.77989							1	-9.27591e-05	-2.69468e-05	29.0048	6.45433	10.0752	0	10.6384	0	1.77964	0	0	0	0	0
Lab 3	Feb 4, 2020	1	37	iRM6	0.000149709	2.04897e-05	0.000634476	0.00014659	0.000343201		0.00037492		0.000249744						-2.70708e-06	2.97567e-06	28.7786	6.40412	9.997		10.5562		1.76612							1	-0.000152416	-1.7514e-05	28.778	6.40397	9.99666	0	10.5558	0	1.76587	0	0	0	0	0
Lab 3	Feb 4, 2020	1	38	STD	0.000149709	2.04897e-05	0.000634476	0.00014659	0.000343201		0.00037492		0.000249744						9.54904e-06	2.00681e-05	28.9851	6.45014	10.069		10.6326		1.77892							1	-0.000140159	-4.21526e-07	28.9845	6.44999	10.0687	0	10.6322	0	1.77867	0	0	0	0	0
Lab 3	Feb 4, 2020	1	39	iRM4	0.000149709	2.04897e-05	0.000634476	0.00014659	0.000343201		0.00037492		0.000249744						5.62445e-05	-1.28463e-05	29.0706	6.46931	10.0991		10.6648		1.7844							1	-9.3464e-05	-3.3336e-05	29.07	6.46917	10.0988	0	10.6645	0	1.78415	0	0	0	0	0
Lab 3	Feb 4, 2020	1	40	STD	0.000149709	2.04897e-05	0.000634476	0.00014659	0.000343201		0.00037492		0.000249744						5.93787e-05	-6.39752e-06	28.9008	6.43166	10.0405		10.6032		1.77413							1	-9.03298e-05	-2.68872e-05	28.9002	6.43152	10.0401	0	10.6028	0	1.77388	0	0	0	0	0
Lab 3	Feb 4, 2020	1	41	iRM5	0.000149709	2.04897e-05	0.000634476	0.00014659	0.000343201		0.00037492		0.000249744						3.78783e-05	4.82636e-06	28.7423	6.39649	9.98583		10.5459		1.76461							1	-0.00011183	-1.56633e-05	28.7416	6.39635	9.98549	0	10.5455	0	1.76436	0	0	0	0	0
Lab 3	Feb 4, 2020	1	42	STD	0.000149709	2.04897e-05	0.000634476	0.00014659	0.000343201		0.00037492		0.000249744						6.01209e-05	5.036e-06	28.8042	6.41036	10.0076		10.5691		1.76853							1	-8.95877e-05	-1.54537e-05	28.8036	6.41022	10.0072	0	10.5687	0	1.76828	0	0	0	0	0
Lab 3	Feb 4, 2020	1	43	iRM6	0.000149709	2.04897e-05	0.000634476	0.00014659	0.000343201		0.00037492		0.000249744						2.69455e-05	-2.83478e-06	28.513	6.34564	9.90675		10.463		1.75089							1	-0.000122763	-2.33244e-05	28.5123	6.3455	9.90641	0	10.4626	0	1.75064	0	0	0	0	0
Lab 3	Feb 4, 2020	1	44	STD	0.000149709	2.04897e-05	0.000634476	0.00014659	0.000343201		0.00037492		0.000249744						9.4977e-06	6.17855e-06	28.9046	6.43292	10.0432		10.6073		1.77509							1	-0.000140211	-1.43111e-05	28.904	6.43277	10.0429	0	10.6069	0	1.77484	0	0	0	0	0
Lab 3	Feb 4, 2020	1	45	iRM4	0.000149709	2.04897e-05	0.000634476	0.00014659	0.000343201		0.00037492		0.000249744						4.83056e-05	1.21688e-05	28.8154	6.41314	10.0125		10.5755		1.76984							1	-0.000101403	-8.32082e-06	28.8148	6.41299	10.0122	0	10.5751	0	1.76959	0	0	0	0	0
Lab 3	Feb 4, 2020	1	46	STD	0.000149709	2.04897e-05	0.000634476	0.00014659	0.000343201		0.00037492		0.000249744						0.000108924	2.6175e-05	28.7344	6.39529	9.98469		10.5464		1.76502							1	-4.07847e-05	5.68538e-06	28.7338	6.39514	9.98435	0	10.546	0	1.76477	0	0	0	0	0
Lab 3	Feb 4, 2020	1	47	iRM5	0.000149709	2.04897e-05	0.000634476	0.00014659	0.000343201		0.00037492		0.000249744						5.24749e-06	-2.31514e-06	28.2979	6.29826	9.83353		10.3872		1.73845							1	-0.000144461	-2.28048e-05	28.2973	6.29811	9.83319	0	10.3869	0	1.7382	0	0	0	0	0
Lab 3	Feb 4, 2020	1	48	STD	0.000149709	2.04897e-05	0.000634476	0.00014659	0.000343201		0.00037492		0.000249744						4.20949e-05	2.15676e-05	28.5761	6.36024	9.93051		10.49		1.75572							1	-0.000107614	1.07797e-06	28.5754	6.3601	9.93017	0	10.4896	0	1.75547	0	0	0	0	0
Lab 3	Feb 4, 2020	1	49	iRM6	0.000149709	2.04897e-05	0.000634476	0.00014659	0.000343201		0.00037492		0.000249744						2.34998e-05	-6.95695e-06	28.4712	6.33707	9.89452		10.4525		1.74951							1	-0.000126209	-2.74466e-05	28.4706	6.33693	9.89418	0	10.4521	0	1.74926	0	0	0	0	0
Lab 3	Feb 4, 2020	1	50	STD	0.000149709	2.04897e-05	0.000634476	0.00014659	0.000343201		0.00037492		0.000249744						1.08911e-05	1.80437e-06	28.6818	6.38404	9.96798		10.5303		1.76255							1	-0.000138817	-1.86853e-05	28.6812	6.38389	9.96764	0	10.5299	0	1.7623	0	0	0	0	0
Lab 3	Feb 4, 2020	1	51	iRM4	0.000149709	2.04897e-05	0.000634476	0.00014659	0.000343201		0.00037492		0.000249744						1.71968e-05	-1.86406e-05	28.5113	6.34625	9.90917		10.4687		1.75228							1	-0.000132512	-3.91302e-05	28.5107	6.3461	9.90883	0	10.4683	0	1.75203	0	0	0	0	0
Lab 3	Feb 4, 2020	1	52	STD	0.000149709	2.04897e-05	0.000634476	0.00014659	0.000343201		0.00037492		0.000249744						6.18341e-05	4.79686e-06	28.3871	6.31869	9.86629		10.4237		1.74488							1	-8.78744e-05	-1.56928e-05	28.3864	6.31854	9.86595	0	10.4234	0	1.74463	0	0	0	0	0
Lab 3	Feb 4, 2020	1	53	iRM5	0.000149709	2.04897e-05	0.000634476	0.00014659	0.000343201		0.00037492		0.000249744						4.23196e-05	3.17421e-06	28.2757	6.294	9.82801		10.3837		1.73822							1	-0.000107389	-1.73155e-05	28.2751	6.29385	9.82767	0	10.3833	0	1.73797	0	0	0	0	0
Lab 3	Feb 4, 2020	1	54	STD	0.000149709	2.04897e-05	0.000634476	0.00014659	0.000343201		0.00037492		0.000249744						2.42279e-05	-3.36013e-07	28.6155	6.36979	9.94639		10.5091		1.75933							1	-0.000125481	-2.08257e-05	28.6148	6.36964	9.94604	0	10.5087	0	1.75908	0	0	0	0	0
Lab 3	Feb 4, 2020	1	55	iRM6	0.000149709	2.04897e-05	0.000634476	0.00014659	0.000343201		0.00037492		0.000249744						1.54591e-05	-6.77868e-06	28.4423	6.33138	9.88655		10.4462		1.74881							1	-0.000134249	-2.72683e-05	28.4417	6.33123	9.88621	0	10.4458	0	1.74856	0	0	0	0	0
Lab 3	Feb 4, 2020	1	56	STD	0.000149709	2.04897e-05	0.000634476	0.00014659	0.000343201		0.00037492		0.000249744						1.95211e-05	-1.34709e-06	28.4146	6.32531	9.87722		10.4368		1.74732							1	-0.000130187	-2.18368e-05	28.4139	6.32516	9.87688	0	10.4364	0	1.74707	0	0	0	0	0
Lab 3	Feb 5, 2020	2	2	STD	9.72761e-05	4.03903e-06	5.12383e-05	3.03285e-05	0.000104616		0.000177799		0.000106009						5.10016e-05	4.49362e-06	24.4296	5.44615	8.51713		9.02578		1.51553							1	-4.62745e-05	4.54588e-07	24.4296	5.44612	8.51702	0	9.0256	0	1.51542	0	0	0	0	0
Lab 3	Feb 5, 2020	2	3	iRM4	9.72761e-05	4.03903e-06	5.12383e-05	3.03285e-05	0.000104616		0.000177799		0.000106009						6.2424e-05	1.23725e-05	23.5822	5.25741	8.222		8.71345		1.46315							1	-3.48521e-05	8.33351e-06	23.5822	5.25738	8.2219	0	8.71328	0	1.46304	0	0	0	0	0
Lab 3	Feb 5, 2020	2	4	STD	9.72761e-05	4.03903e-06	5.12383e-05	3.03285e-05	0.000104616		0.000177799		0.000106009						4.47368e-05	-1.06706e-05	24.2077	5.39691	8.44049		8.94531		1.50215							1	-5.25393e-05	-1.47096e-05	24.2077	5.39688	8.44038	0	8.94514	0	1.50204	0	0	0	0	0
Lab 3	Feb 5, 2020	2	5	iRM5	9.72761e-05	4.03903e-06	5.12383e-05	3.03285e-05	0.000104616		0.000177799		0.000106009						6.06638e-05	-4.17698e-06	23.5317	5.2463	8.20498		8.69609		1.46038							1	-3.66123e-05	-8.21602e-06	23.5316	5.24627	8.20487	0	8.69591	0	1.46027	0	0	0	0	0
Lab 3	Feb 5, 2020	2	6	STD	9.72761e-05	4.03903e-06	5.12383e-05	3.03285e-05	0.000104616		0.000177799		0.000106009						-1.03394e-05	-2.43322e-06	23.7557	5.2964	8.28344		8.7796		1.47445							1	-0.000107616	-6.47225e-06	23.7557	5.29637	8.28333	0	8.77942	0	1.47435	0	0	0	0	0
Lab 3	Feb 5, 2020	2	7	iRM6	9.72761e-05	4.03903e-06	5.12383e-05	3.03285e-05	0.000104616		0.000177799		0.000106009						-1.9308e-06	1.14902e-05	23.1428	5.1598	8.06995		8.55361		1.4365							1	-9.92069e-05	7.45117e-06	23.1427	5.15977	8.06985	0	8.55343	0	1.43639	0	0	0	0	0
Lab 3	Feb 5, 2020	2	8	STD	9.72761e-05	4.03903e-06	5.12383e-05	3.03285e-05	0.000104616		0.000177799		0.000106009						2.5774e-05	1.30548e-05	23.769	5.29948	8.28865		8.78554		1.4755							1	-7.15022e-05	9.01579e-06	23.7689	5.29945	8.28854	0	8.78536	0	1.47539	0	0	0	0	0
Lab 3	Feb 5, 2020	2	9	iRM4	9.72761e-05	4.03903e-06	5.12383e-05	3.03285e-05	0.000104616		0.000177799		0.000106009						5.59248e-05	1.95995e-05	23.1686	5.16566	8.07954		8.56427		1.43839							1	-4.13513e-05	1.55605e-05	23.1685	5.16563	8.07944	0	8.56409	0	1.43829	0	0	0	0	0
Lab 3	Feb 5, 2020	2	10	STD	9.72761e-05	4.03903e-06	5.12383e-05	3.03285e-05	0.000104616		0.000177799		0.000106009						3.23353e-05	-5.12364e-06	23.6433	5.27164	8.24523		8.7402		1.46798							1	-6.49409e-05	-9.16267e-06	23.6433	5.27161	8.24513	0	8.74003	0	1.46787	0	0	0	0	0
Lab 3	Feb 5, 2020	2	11	iRM5	9.72761e-05	4.03903e-06	5.12383e-05	3.03285e-05	0.000104616		0.000177799		0.000106009						4.92795e-05	2.0715e-05	23.1476	5.16115	8.07263		8.55744		1.43731							1	-4.79966e-05	1.66759e-05	23.1476	5.16112	8.07253	0	8.55726	0	1.4372	0	0	0	0	0
Lab 3	Feb 5, 2020	2	12	STD	9.72761e-05	4.03903e-06	5.12383e-05	3.03285e-05	0.000104616		0.000177799		0.000106009						3.30239e-05	1.8153e-06	23.353	5.20708	8.14459		8.63406		1.45025							1	-6.42523e-05	-2.22373e-06	23.3529	5.20705	8.14449	0	8.63388	0	1.45015	0	0	0	0	0
Lab 3	Feb 5, 2020	2	13	iRM6	9.72761e-05	4.03903e-06	5.12383e-05	3.03285e-05	0.000104616		0.000177799		0.000106009						9.89584e-06	1.3993e-05	22.6327	5.04657	7.89366		8.3683		1.40565							1	-8.73803e-05	9.95398e-06	22.6326	5.04654	7.89356	0	8.36812	0	1.40554	0	0	0	0	0
Lab 3	Feb 5, 2020	2	14	STD	9.72761e-05	4.03903e-06	5.12383e-05	3.03285e-05	0.000104616		0.000177799		0.000106009						3.36095e-05	-2.12022e-06	23.1226	5.15583	8.06474		8.54985		1.43619							1	-6.36667e-05	-6.15926e-06	23.1225	5.1558	8.06464	0	8.54967	0	1.43608	0	0	0	0	0
Lab 3	Feb 5, 2020	2	15	iRM4	9.72761e-05	4.03903e-06	5.12383e-05	3.03285e-05	0.000104616		0.000177799		0.000106009						7.29545e-05	2.67656e-05	22.4474	5.00539	7.82948		8.30074		1.39443							1	-2.43216e-05	2.27265e-05	22.4474	5.00536	7.82937	0	8.30056	0	1.39432	0	0	0	0	0
Lab 3	Feb 5, 2020	2	16	STD	9.72761e-05	4.03903e-06	5.12383e-05	3.03285e-05	0.000104616		0.000177799		0.000106009						4.45154e-05	1.62461e-05	22.9315	5.11336	7.99851		8.4802		1.42464							1	-5.27607e-05	1.2207e-05	22.9315	5.11333	7.9984	0	8.48003	0	1.42454	0	0	0	0	0
Lab 3	Feb 5, 2020	2	17	iRM5	9.72761e-05	4.03903e-06	5.12383e-05	3.03285e-05	0.000104616		0.000177799		0.000106009						5.23961e-05	-2.85478e-05	22.2055	4.95154	7.74554		8.21222		1.37962							1	-4.48801e-05	-3.25868e-05	22.2054	4.95151	7.74543	0	8.21204	0	1.37951	0	0	0	0	0
Lab 3	Feb 5, 2020	2	18	STD	9.72761e-05	4.03903e-06	5.12383e-05	3.03285e-05	0.000104616		0.000177799		0.000106009						5.09773e-05	1.78034e-05	22.6013	5.03991	7.88382		8.35906		1.40429							1	-4.62988e-05	1.37644e-05	22.6012	5.03987	7.88372	0	8.35889	0	1.40418	0	0	0	0	0
Lab 3	Feb 5, 2020	2	19	iRM6	9.72761e-05	4.03903e-06	5.12383e-05	3.03285e-05	0.000104616		0.000177799		0.000106009						-3.23682e-06	-4.94016e-06	21.9783	4.90109	7.66679		8.12924		1.36573							1	-0.000100513	-8.97919e-06	21.9783	4.90106	7.66669	0	8.12907	0	1.36563	0	0	0	0	0
Lab 3	Feb 5, 2020	2	20	STD	9.72761e-05	4.03903e-06	5.12383e-05	3.03285e-05	0.000104616		0.000177799		0.000106009						1.68215e-05	3.49759e-06	22.5705	5.03316	7.87354		8.3487		1.40264							1	-8.04547e-05	-5.41442e-07	22.5704	5.03313	7.87343	0	8.34852	0	1.40254	0	0	0	0	0
Lab 3	Feb 5, 2020	2	21	iRM4	9.72761e-05	4.03903e-06	5.12383e-05	3.03285e-05	0.000104616		0.000177799		0.000106009						4.67111e-05	1.56204e-05	21.832	4.86852	7.61616		8.0759		1.35687							1	-5.0565e-05	1.15813e-05	21.8319	4.86849	7.61605	0	8.07573	0	1.35677	0	0	0	0	0
Lab 3	Feb 5, 2020	2	22	STD	9.72761e-05	4.03903e-06	5.12383e-05	3.03285e-05	0.000104616		0.000177799		0.000106009						3.70863e-05	-9.45879e-06	22.5735	5.03398	7.87507		8.35062		1.40307							1	-6.01899e-05	-1.34978e-05	22.5735	5.03395	7.87497	0	8.35044	0	1.40296	0	0	0	0	0
Lab 3	Feb 5, 2020	2	23	iRM5	9.72761e-05	4.03903e-06	5.12383e-05	3.03285e-05	0.000104616		0.000177799		0.000106009						3.43917e-05	1.23856e-05	21.8788	4.87915	7.63294		8.0941		1.35998							1	-6.28844e-05	8.3466e-06	21.8788	4.87912	7.63283	0	8.09392	0	1.35987	0	0	0	0	0
Lab 3	Feb 5, 2020	2	24	STD	9.72761e-05	4.03903e-06	5.12383e-05	3.03285e-05	0.000104616		0.000177799		0.000106009						1.24638e-05	2.10443e-05	22.3069	4.97463	7.78236		8.2529		1.38669							1	-8.48123e-05	1.70053e-05	22.3068	4.9746	7.78226	0	8.25272	0	1.38658	0	0	0	0	0
Lab 3	Feb 5, 2020	2	25	iRM6	9.72761e-05	4.03903e-06	5.12383e-05	3.03285e-05	0.000104616		0.000177799		0.000106009						2.01742e-05	1.07773e-05	21.5405	4.80377	7.51523		7.96978		1.33919							1	-7.7102e-05	6.73823e-06	21.5404	4.80374	7.51512	0	7.9696	0	1.33908	0	0	0	0	0
Lab 3	Feb 5, 2020	2	26	STD	9.72761e-05	4.03903e-06	5.12383e-05	3.03285e-05	0.000104616		0.000177799		0.000106009						3.67112e-05	2.61459e-05	22.0968	4.92791	7.70952		8.17606		1.37391							1	-6.05649e-05	2.21069e-05	22.0968	4.92788	7.70941	0	8.17589	0	1.37381	0	0	0	0	0
Lab 3	Feb 5, 2020	2	27	iRM4	9.72761e-05	4.03903e-06	5.12383e-05	3.03285e-05	0.000104616		0.000177799		0.000106009						2.55905e-05	1.07526e-05	21.4881	4.79225	7.49737		7.95127		1.33614							1	-7.16856e-05	6.71357e-06	21.488	4.79222	7.49726	0	7.95109	0	1.33604	0	0	0	0	0
Lab 3	Feb 5, 2020	2	28	STD	9.72761e-05	4.03903e-06	5.12383e-05	3.03285e-05	0.000104616		0.000177799		0.000106009						2.14764e-05	4.34801e-06	22.188	4.94839	7.74175		8.21059		1.37973							1	-7.57997e-05	3.08971e-07	22.1879	4.94836	7.74164	0	8.21042	0	1.37963	0	0	0	0	0
Lab 3	Feb 5, 2020	2	29	iRM5	9.72761e-05	4.03903e-06	5.12383e-05	3.03285e-05	0.000104616		0.000177799		0.000106009						2.81427e-05	2.66112e-05	21.4882	4.79236	7.49779		7.95213		1.33637							1	-6.91335e-05	2.25722e-05	21.4882	4.79233	7.49768	0	7.95195	0	1.33626	0	0	0	0	0
Lab 3	Feb 5, 2020	2	30	STD	9.72761e-05	4.03903e-06	5.12383e-05	3.03285e-05	0.000104616		0.000177799		0.000106009						5.08706e-06	2.05285e-05	21.7259	4.84547	7.58095		8.04057		1.35123							1	-9.21891e-05	1.64895e-05	21.7259	4.84544	7.58084	0	8.04039	0	1.35113	0	0	0	0	0
Lab 3	Feb 5, 2020	2	31	iRM6	9.72761e-05	4.03903e-06	5.12383e-05	3.03285e-05	0.000104616		0.000177799		0.000106009						5.55299e-05	1.59163e-05	21.2929	4.74898	7.43004		7.88066		1.32442							1	-4.17462e-05	1.18772e-05	21.2928	4.74895	7.42994	0	7.88048	0	1.32431	0	0	0	0	0
Lab 3	Feb 5, 2020	2	32	STD	9.72761e-05	4.03903e-06	5.12383e-05	3.03285e-05	0.000104616		0.000177799		0.000106009						3.16581e-05	1.19171e-05	21.687	4.83695	7.56776		8.02697		1.34903							1	-6.5618e-05	7.87808e-06	21.687	4.83692	7.56765	0	8.02679	0	1.34893	0	0	0	0	0
Lab 3	Feb 5, 2020	2	33	iRM4	9.72761e-05	4.03903e-06	5.12383e-05	3.03285e-05	0.000104616		0.000177799		0.000106009						1.63614e-05	2.42406e-05	21.0884	4.70343	7.35911		7.80585		1.31194							1	-8.09147e-05	2.02016e-05	21.0883	4.7034	7.35901	0	7.80567	0	1.31184	0	0	0	0	0
Lab 3	Feb 5, 2020	2	34	STD	9.72761e-05	4.03903e-06	5.12383e-05	3.03285e-05	0.000104616		0.000177799		0.000106009						3.07141e-05	9.24717e-06	21.4852	4.79205	7.49782		7.95325		1.33672							1	-6.6562e-05	5.20813e-06	21.4851	4.79202	7.49771	0	7.95307	0	1.33661	0	0	0	0	0
Lab 3	Feb 5, 2020	2	35	iRM5	9.72761e-05	4.03903e-06	5.12383e-05	3.03285e-05	0.000104616		0.000177799		0.000106009						4.01246e-05	-3.3331e-06	21.0027	4.6845	7.32963		7.77498		1.30683							1	-5.71515e-05	-7.37213e-06	21.0026	4.68447	7.32953	0	7.7748	0	1.30672	0	0	0	0	0
Lab 3	Feb 5, 2020	2	36	STD	9.72761e-05	4.03903e-06	5.12383e-05	3.03285e-05	0.000104616		0.000177799		0.000106009						4.54195e-05	1.85645e-05	21.3802	4.76879	7.46166		7.91526		1.33041							1	-5.18566e-05	1.45254e-05	21.3802	4.76876	7.46156	0	7.91508	0	1.3303	0	0	0	0	0
Lab 3	Feb 5, 2020	2	37	iRM6	9.72761e-05	4.03903e-06	5.12383e-05	3.03285e-05	0.000104616		0.000177799		0.000106009						-3.76696e-06	1.33522e-05	20.6284	4.60112	7.19939		7.63733		1.28373							1	-0.000101043	9.31319e-06	20.6284	4.60108	7.19929	0	7.63715	0	1.28362	0	0	0	0	0
Lab 3	Feb 5, 2020	2	38	STD	9.72761e-05	4.03903e-06	5.12383e-05	3.03285e-05	0.000104616		0.000177799		0.000106009						1.17812e-05	1.84273e-05	21.1477	4.71705	7.38087		7.83004		1.31614							1	-8.54949e-05	1.43882e-05	21.1477	4.71702	7.38077	0	7.82986	0	1.31603	0	0	0	0	0
Lab 3	Feb 5, 2020	2	39	iRM4	9.72761e-05	4.03903e-06	5.12383e-05	3.03285e-05	0.000104616		0.000177799		0.000106009						5.60414e-05	-4.11347e-06	20.6338	4.60249	7.20172		7.6402		1.28427							1	-4.12347e-05	-8.1525e-06	20.6337	4.60246	7.20161	0	7.64002	0	1.28417	0	0	0	0	0
Lab 3	Feb 5, 2020	2	40	STD	9.72761e-05	4.03903e-06	5.12383e-05	3.03285e-05	0.000104616		0.000177799		0.000106009						9.32972e-07	-1.44222e-05	21.1611	4.72018	7.38595		7.83583		1.31722							1	-9.63432e-05	-1.84612e-05	21.161	4.72015	7.38584	0	7.83565	0	1.31711	0	0	0	0	0
Lab 3	Feb 5, 2020	2	41	iRM5	9.72761e-05	4.03903e-06	5.12383e-05	3.03285e-05	0.000104616		0.000177799		0.000106009						1.51292e-05	1.0537e-06	20.3357	4.5361	7.09801		7.53064		1.2659							1	-8.2147e-05	-2.98533e-06	20.3356	4.53607	7.0979	0	7.53046	0	1.26579	0	0	0	0	0
Lab 3	Feb 5, 2020	2	42	STD	9.72761e-05	4.03903e-06	5.12383e-05	3.03285e-05	0.000104616		0.000177799		0.000106009						1.27425e-06	-2.39877e-05	20.7942	4.63846	7.25828		7.70087		1.29457							1	-9.60019e-05	-2.80267e-05	20.7942	4.63843	7.25818	0	7.7007	0	1.29446	0	0	0	0	0
Lab 3	Feb 5, 2020	2	43	iRM6	9.72761e-05	4.03903e-06	5.12383e-05	3.03285e-05	0.000104616		0.000177799		0.000106009						-7.49114e-06	2.0352e-05	20.2684	4.52118	7.07487		7.50642		1.26191							1	-0.000104767	1.63129e-05	20.2684	4.52115	7.07476	0	7.50625	0	1.26181	0	0	0	0	0
Lab 3	Feb 5, 2020	2	44	STD	9.72761e-05	4.03903e-06	5.12383e-05	3.03285e-05	0.000104616		0.000177799		0.000106009						5.26441e-06	3.12029e-05	20.7547	4.62973	7.24489		7.68696		1.29233							1	-9.20117e-05	2.71638e-05	20.7546	4.6297	7.24479	0	7.68678	0	1.29222	0	0	0	0	0
Lab 3	Feb 5, 2020	2	45	iRM4	9.72761e-05	4.03903e-06	5.12383e-05	3.03285e-05	0.000104616		0.000177799		0.000106009						2.51787e-05	1.57057e-05	20.2801	4.52387	7.07935		7.51158		1.26284							1	-7.20974e-05	1.16667e-05	20.28	4.52384	7.07925	0	7.5114	0	1.26273	0	0	0	0	0
Lab 3	Feb 5, 2020	2	46	STD	9.72761e-05	4.03903e-06	5.12383e-05	3.03285e-05	0.000104616		0.000177799		0.000106009						1.40843e-05	2.7144e-05	20.6309	4.60222	7.20202		7.64199		1.28478							1	-8.31918e-05	2.31049e-05	20.6309	4.60219	7.20191	0	7.64182	0	1.28467	0	0	0	0	0
Lab 3	Feb 5, 2020	2	47	iRM5	9.72761e-05	4.03903e-06	5.12383e-05	3.03285e-05	0.000104616		0.000177799		0.000106009						1.4417e-05	-8.11933e-06	19.9711	4.45508	6.97179		7.39789		1.2438							1	-8.28591e-05	-1.21584e-05	19.9711	4.45505	6.97169	0	7.39771	0	1.24369	0	0	0	0	0
Lab 3	Feb 5, 2020	2	48	STD	9.72761e-05	4.03903e-06	5.12383e-05	3.03285e-05	0.000104616		0.000177799		0.000106009						-2.39014e-06	-2.06505e-05	20.3676	4.5436	7.11038		7.54513		1.26862							1	-9.96663e-05	-2.46896e-05	20.3675	4.54357	7.11027	0	7.54495	0	1.26851	0	0	0	0	0
Lab 3	Feb 5, 2020	2	49	iRM6	9.72761e-05	4.03903e-06	5.12383e-05	3.03285e-05	0.000104616		0.000177799		0.000106009						1.68025e-05	9.84588e-08	19.8251	4.42264	6.92125		7.34461		1.23489							1	-8.04736e-05	-3.94058e-06	19.825	4.42261	6.92115	0	7.34444	0	1.23478	0	0	0	0	0
Lab 3	Feb 5, 2020	2	50	STD	9.72761e-05	4.03903e-06	5.12383e-05	3.03285e-05	0.000104616		0.000177799		0.000106009						3.69454e-05	-9.76798e-06	20.2729	4.52263	7.07781		7.5109		1.26286							1	-6.03307e-05	-1.3807e-05	20.2729	4.5226	7.07771	0	7.51072	0	1.26276	0	0	0	0	0
Lab 3	Feb 5, 2020	2	51	iRM4	9.72761e-05	4.03903e-06	5.12383e-05	3.03285e-05	0.000104616		0.000177799		0.000106009						1.36882e-05	-6.369e-06	19.7008	4.39504	6.87827		7.29938		1.22737							1	-8.35879e-05	-1.0408e-05	19.7008	4.39501	6.87816	0	7.2992	0	1.22726	0	0	0	0	0
Lab 3	Feb 5, 2020	2	52	STD	9.72761e-05	4.03903e-06	5.12383e-05	3.03285e-05	0.000104616		0.000177799		0.000106009						2.74564e-05	3.17565e-05	20.3095	4.53089	7.09095		7.52525		1.26537							1	-6.98197e-05	2.77175e-05	20.3095	4.53086	7.09084	0	7.52507	0	1.26526	0	0	0	0	0
Lab 3	Feb 5, 2020	2	53	iRM5	9.72761e-05	4.03903e-06	5.12383e-05	3.03285e-05	0.000104616		0.000177799		0.000106009						4.89119e-05	7.51249e-06	19.5619	4.36421	6.83004		7.24865		1.21889							1	-4.83642e-05	3.47345e-06	19.5618	4.36418	6.82993	0	7.24847	0	1.21879	0	0	0	0	0
Lab 3	Feb 5, 2020	2	54	STD	9.72761e-05	4.03903e-06	5.12383e-05	3.03285e-05	0.000104616		0.000177799		0.000106009						3.44522e-05	5.29491e-06	19.9857	4.45876	6.97822		7.40603		1.24539							1	-6.28239e-05	1.25587e-06	19.9856	4.45873	6.97812	0	7.40585	0	1.24528	0	0	0	0	0
Lab 3	Feb 5, 2020	2	55	iRM6	9.72761e-05	4.03903e-06	5.12383e-05	3.03285e-05	0.000104616		0.000177799		0.000106009						-3.65823e-07	3.04076e-05	19.3805	4.32382	6.76713		7.18217		1.20779							1	-9.7642e-05	2.63686e-05	19.3805	4.32379	6.76702	0	7.18199	0	1.20768	0	0	0	0	0
Lab 3	Feb 5, 2020	2	56	STD	9.72761e-05	4.03903e-06	5.12383e-05	3.03285e-05	0.000104616		0.000177799		0.000106009						6.97293e-06	1.00369e-05	19.7217	4.39997	6.88641		7.30898		1.2291							1	-9.03032e-05	5.99783e-06	19.7216	4.39994	6.8863	0	7.3088	0	1.22899	0	0	0	0	0
Lab 3	Jul 20, 2020	1	2	STD	0.000219419	-1.15823e-05	0.000342302	0.000118273	0.000251335		0.000302911		0.000192744						-3.94507e-05	2.46468e-05	21.2452	4.73109	7.39077		7.81509		1.30937							1	-0.000258869	3.62292e-05	21.2449	4.73097	7.39052	0	7.81478	0	1.30918	0	0	0	0	0
Lab 3	Jul 20, 2020	1	3	iRM4	0.000219419	-1.15823e-05	0.000342302	0.000118273	0.000251335		0.000302911		0.000192744						-2.9899e-05	3.34085e-05	21.3198	4.74769	7.41671		7.84266		1.31399							1	-0.000249318	4.49908e-05	21.3195	4.74758	7.41646	0	7.84236	0	1.3138	0	0	0	0	0
Lab 3	Jul 20, 2020	1	4	STD	0.000219419	-1.15823e-05	0.000342302	0.000118273	0.000251335		0.000302911		0.000192744						-6.73861e-05	3.86575e-05	21.1526	4.71054	7.35864		7.78122		1.30369							1	-0.000286805	5.02398e-05	21.1522	4.71042	7.35839	0	7.78092	0	1.30349	0	0	0	0	0
Lab 3	Jul 20, 2020	1	5	iRM5	0.000219419	-1.15823e-05	0.000342302	0.000118273	0.000251335		0.000302911		0.000192744						-1.17761e-05	4.60215e-05	21.0276	4.68269	7.31534		7.73568		1.29611							1	-0.000231195	5.76038e-05	21.0272	4.68257	7.31509	0	7.73537	0	1.29592	0	0	0	0	0
Lab 3	Jul 20, 2020	1	6	STD	0.000219419	-1.15823e-05	0.000342302	0.000118273	0.000251335		0.000302911		0.000192744						-5.18189e-05	1.29611e-05	21.1507	4.71019	7.35831		7.78132		1.30375							1	-0.000271237	2.45434e-05	21.1504	4.71007	7.35806	0	7.78102	0	1.30356	0	0	0	0	0
Lab 3	Jul 20, 2020	1	7	iRM4	0.000219419	-1.15823e-05	0.000342302	0.000118273	0.000251335		0.000302911		0.000192744						-5.51398e-05	2.05771e-05	21.5483	4.79885	7.49686		7.92804		1.32837							1	-0.000274558	3.21595e-05	21.548	4.79873	7.49661	0	7.92774	0	1.32818	0	0	0	0	0
Lab 3	Jul 20, 2020	1	8	STD	0.000219419	-1.15823e-05	0.000342302	0.000118273	0.000251335		0.000302911		0.000192744						-6.27461e-05	2.30273e-05	21.0981	4.69856	7.34034		7.76265		1.3007							1	-0.000282165	3.46097e-05	21.0977	4.69844	7.34009	0	7.76235	0	1.30051	0	0	0	0	0
Lab 3	Jul 20, 2020	1	9	iRM5	0.000219419	-1.15823e-05	0.000342302	0.000118273	0.000251335		0.000302911		0.000192744						-5.0632e-06	2.66524e-05	21.2823	4.73967	7.40473		7.83097		1.31219							1	-0.000224482	3.82347e-05	21.282	4.73955	7.40448	0	7.83067	0	1.312	0	0	0	0	0
Lab 3	Jul 20, 2020	1	10	STD	0.000219419	-1.15823e-05	0.000342302	0.000118273	0.000251335		0.000302911		0.000192744						-5.20092e-05	3.38924e-05	21.0705	4.69254	7.33108		7.75309		1.2991							1	-0.000271428	4.54747e-05	21.0702	4.69242	7.33083	0	7.75278	0	1.29891	0	0	0	0	0
Lab 3	Jul 20, 2020	1	11	iRM4	0.000219419	-1.15823e-05	0.000342302	0.000118273	0.000251335		0.000302911		0.000192744						-3.46473e-05	6.64217e-05	20.8904	4.65249	7.26859		7.68735		1.28815							1	-0.000254066	7.80041e-05	20.89	4.65238	7.26834	0	7.68705	0	1.28796	0	0	0	0	0
Lab 3	Jul 20, 2020	1	12	STD	0.000219419	-1.15823e-05	0.000342302	0.000118273	0.000251335		0.000302911		0.000192744						-6.78949e-05	-6.72177e-06	20.9432	4.66426	7.28714		7.70713		1.29147							1	-0.000287314	4.86057e-06	20.9429	4.66415	7.28689	0	7.70682	0	1.29128	0	0	0	0	0
Lab 3	Jul 20, 2020	1	13	iRM5	0.000219419	-1.15823e-05	0.000342302	0.000118273	0.000251335		0.000302911		0.000192744						-3.28358e-05	2.76074e-05	21.33	4.75045	7.42191		7.84984		1.31543							1	-0.000252254	3.91898e-05	21.3296	4.75033	7.42166	0	7.84954	0	1.31524	0	0	0	0	0
Lab 3	Jul 20, 2020	1	14	STD	0.000219419	-1.15823e-05	0.000342302	0.000118273	0.000251335		0.000302911		0.000192744						-7.16348e-05	-1.29455e-07	20.9171	4.65859	7.27853		7.69839		1.29006							1	-0.000291053	1.14529e-05	20.9168	4.65847	7.27828	0	7.69808	0	1.28987	0	0	0	0	0
Lab 3	Jul 20, 2020	1	15	iRM4	0.000219419	-1.15823e-05	0.000342302	0.000118273	0.000251335		0.000302911		0.000192744						-3.63115e-05	1.78828e-05	20.7552	4.62271	7.22258		7.63963		1.28031							1	-0.00025573	2.94652e-05	20.7549	4.62259	7.22233	0	7.63933	0	1.28012	0	0	0	0	0
Lab 3	Jul 20, 2020	1	16	STD	0.000219419	-1.15823e-05	0.000342302	0.000118273	0.000251335		0.000302911		0.000192744						-6.55809e-05	2.40406e-05	20.727	4.61646	7.21282		7.62949		1.27863							1	-0.000285	3.5623e-05	20.7266	4.61634	7.21256	0	7.62919	0	1.27844	0	0	0	0	0
Lab 3	Jul 20, 2020	1	17	iRM5	0.000219419	-1.15823e-05	0.000342302	0.000118273	0.000251335		0.000302911		0.000192744						1.06338e-05	2.43819e-05	20.5669	4.58078	7.1573		7.57094		1.26886							1	-0.000208785	3.59642e-05	20.5665	4.58066	7.15704	0	7.57064	0	1.26867	0	0	0	0	0
Lab 3	Jul 20, 2020	1	18	STD	0.000219419	-1.15823e-05	0.000342302	0.000118273	0.000251335		0.000302911		0.000192744						-4.65265e-05	2.68121e-05	20.679	4.60584	7.1966		7.61279		1.27591							1	-0.000265945	3.83944e-05	20.6787	4.60572	7.19634	0	7.61249	0	1.27571	0	0	0	0	0
Lab 3	Jul 20, 2020	1	19	iRM4	0.000219419	-1.15823e-05	0.000342302	0.000118273	0.000251335		0.000302911		0.000192744						-2.43211e-05	6.2659e-05	21.0236	4.68275	7.31669		7.74003		1.29728							1	-0.00024374	7.42413e-05	21.0233	4.68263	7.31644	0	7.73972	0	1.29709	0	0	0	0	0
Lab 3	Jul 20, 2020	1	20	STD	0.000219419	-1.15823e-05	0.000342302	0.000118273	0.000251335		0.000302911		0.000192744						-4.4528e-05	3.37236e-05	20.5935	4.58689	7.16717		7.58209		1.27083							1	-0.000263947	4.53059e-05	20.5931	4.58677	7.16692	0	7.58179	0	1.27063	0	0	0	0	0
Lab 3	Jul 20, 2020	1	21	iRM5	0.000219419	-1.15823e-05	0.000342302	0.000118273	0.000251335		0.000302911		0.000192744						1.9171e-05	3.11885e-05	20.7747	4.62742	7.23057		7.6494		1.28217							1	-0.000200248	4.27708e-05	20.7744	4.6273	7.23032	0	7.6491	0	1.28197	0	0	0	0	0
Lab 3	Jul 20, 2020	1	22	STD	0.000219419	-1.15823e-05	0.000342302	0.000118273	0.000251335		0.000302911		0.000192744						-5.54515e-05	5.69331e-05	20.6193	4.59278	7.17657		7.59236		1.2726							1	-0.00027487	6.85155e-05	20.619	4.59266	7.17631	0	7.59205	0	1.27241	0	0	0	0	0
Lab 3	Jul 20, 2020	1	23	iRM4	0.000219419	-1.15823e-05	0.000342302	0.000118273	0.000251335		0.000302911		0.000192744						-4.82534e-05	1.63794e-05	20.4569	4.55671	7.12024		7.53312		1.26273							1	-0.000267672	2.79618e-05	20.4566	4.55659	7.11999	0	7.53282	0	1.26254	0	0	0	0	0
Lab 3	Jul 20, 2020	1	24	STD	0.000219419	-1.15823e-05	0.000342302	0.000118273	0.000251335		0.000302911		0.000192744						-5.59881e-05	3.51327e-05	20.5023	4.56694	7.13637		7.55029		1.26567							1	-0.000275407	4.67151e-05	20.5019	4.56682	7.13612	0	7.54998	0	1.26548	0	0	0	0	0
Lab 3	Jul 20, 2020	1	25	iRM5	0.000219419	-1.15823e-05	0.000342302	0.000118273	0.000251335		0.000302911		0.000192744						-5.72181e-05	1.25714e-05	20.7713	4.62686	7.23013		7.64986		1.28238							1	-0.000276637	2.41538e-05	20.771	4.62674	7.22988	0	7.64955	0	1.28219	0	0	0	0	0
Lab 3	Jul 20, 2020	1	26	STD	0.000219419	-1.15823e-05	0.000342302	0.000118273	0.000251335		0.000302911		0.000192744						-5.39778e-05	6.32951e-05	20.4855	4.56327	7.13088		7.54518		1.26484							1	-0.000273396	7.48775e-05	20.4852	4.56316	7.13062	0	7.54487	0	1.26465	0	0	0	0	0
Lab 3	Jul 20, 2020	1	27	iRM4	0.000219419	-1.15823e-05	0.000342302	0.000118273	0.000251335		0.000302911		0.000192744						-1.34798e-05	2.95412e-05	20.5486	4.57743	7.15315		7.5689		1.26888							1	-0.000232898	4.11235e-05	20.5483	4.57731	7.1529	0	7.5686	0	1.26869	0	0	0	0	0
Lab 3	Jul 20, 2020	1	28	STD	0.000219419	-1.15823e-05	0.000342302	0.000118273	0.000251335		0.000302911		0.000192744						-8.6783e-05	2.68991e-07	20.4841	4.56314	7.1309		7.54544		1.265							1	-0.000306202	1.18513e-05	20.4838	4.56302	7.13065	0	7.54513	0	1.2648	0	0	0	0	0
Lab 3	Jul 20, 2020	1	29	iRM5	0.000219419	-1.15823e-05	0.000342302	0.000118273	0.000251335		0.000302911		0.000192744						-3.46552e-05	4.35821e-05	20.2149	4.50327	7.03738		7.44684		1.24852							1	-0.000254074	5.51645e-05	20.2145	4.50315	7.03713	0	7.44654	0	1.24832	0	0	0	0	0
Lab 3	Jul 20, 2020	1	30	STD	0.000219419	-1.15823e-05	0.000342302	0.000118273	0.000251335		0.000302911		0.000192744						-5.8505e-05	1.10604e-05	20.3049	4.52336	7.0689		7.4804		1.25416							1	-0.000277924	2.26428e-05	20.3045	4.52324	7.06865	0	7.4801	0	1.25397	0	0	0	0	0
Lab 3	Jul 20, 2020	1	31	iRM4	0.000219419	-1.15823e-05	0.000342302	0.000118273	0.000251335		0.000302911		0.000192744						-5.6195e-05	3.16768e-05	20.629	4.59567	7.18219		7.60056		1.27436							1	-0.000275614	4.32592e-05	20.6287	4.59555	7.18193	0	7.60025	0	1.27416	0	0	0	0	0
Lab 3	Jul 20, 2020	1	32	STD	0.000219419	-1.15823e-05	0.000342302	0.000118273	0.000251335		0.000302911		0.000192744						-6.06204e-05	1.74628e-05	20.2055	4.5014	7.0349		7.44494		1.24832							1	-0.000280039	2.90452e-05	20.2052	4.50128	7.03465	0	7.44464	0	1.24812	0	0	0	0	0
Lab 3	Jul 20, 2020	1	33	iRM5	0.000219419	-1.15823e-05	0.000342302	0.000118273	0.000251335		0.000302911		0.000192744						-1.58427e-05	4.48049e-05	20.2322	4.50749	7.04454		7.45551		1.25017							1	-0.000235261	5.63873e-05	20.2319	4.50737	7.04429	0	7.45521	0	1.24998	0	0	0	0	0
Lab 3	Jul 20, 2020	1	34	STD	0.000219419	-1.15823e-05	0.000342302	0.000118273	0.000251335		0.000302911		0.000192744						-7.28403e-05	-2.31579e-06	20.1498	4.4891	7.01598		7.42551		1.24514							1	-0.000292259	9.26655e-06	20.1494	4.48898	7.01573	0	7.42521	0	1.24495	0	0	0	0	0
Lab 3	Jul 20, 2020	1	35	iRM4	0.000219419	-1.15823e-05	0.000342302	0.000118273	0.000251335		0.000302911		0.000192744						-4.11214e-05	2.15942e-05	19.9343	4.44118	6.9413		7.34671		1.23196							1	-0.00026054	3.31765e-05	19.9339	4.44106	6.94105	0	7.34641	0	1.23176	0	0	0	0	0
Lab 3	Jul 20, 2020	1	36	STD	0.000219419	-1.15823e-05	0.000342302	0.000118273	0.000251335		0.000302911		0.000192744						-2.97896e-05	1.85385e-05	19.9137	4.43666	6.93424		7.3396		1.23081							1	-0.000249208	3.01209e-05	19.9133	4.43654	6.93399	0	7.3393	0	1.23062	0	0	0	0	0
Lab 3	Jul 20, 2020	1	37	iRM5	0.000219419	-1.15823e-05	0.000342302	0.000118273	0.000251335		0.000302911		0.000192744						-1.32176e-05	2.21407e-05	20.2511	4.51202	7.05221		7.46478		1.2519							1	-0.000232636	3.3723e-05	20.2508	4.5119	7.05196	0	7.46448	0	1.25171	0	0	0	0	0
Lab 3	Jul 20, 2020	1	38	STD	0.000219419	-1.15823e-05	0.000342302	0.000118273	0.000251335		0.000302911		0.000192744						-6.32405e-05	2.23425e-05	19.8213	4.41625	6.90264		7.30663		1.2254							1	-0.000282659	3.39249e-05	19.8209	4.41613	6.90239	0	7.30632	0	1.22521	0	0	0	0	0
Lab 3	Jul 21, 2020	2	2	STD	0.00015137	-8.88412e-06	0.000214101	7.2305e-05	0.000132893		0.000192013		0.000109294						1.94787e-05	1.75854e-05	17.4706	3.89613	6.09536		6.46401		1.08612							1	-0.000131891	2.64696e-05	17.4703	3.89606	6.09522	0	6.46382	0	1.08601	0	0	0	0	0
Lab 3	Jul 21, 2020	2	3	iRM10	0.00015137	-8.88412e-06	0.000214101	7.2305e-05	0.000132893		0.000192013		0.000109294						5.79236e-06	1.29128e-05	17.4494	3.8915	6.08831		6.45691		1.08497							1	-0.000145577	2.17969e-05	17.4492	3.89143	6.08818	0	6.45671	0	1.08486	0	0	0	0	0
Lab 3	Jul 21, 2020	2	4	STD	0.00015137	-8.88412e-06	0.000214101	7.2305e-05	0.000132893		0.000192013		0.000109294						-8.86769e-06	1.37331e-05	17.3798	3.87602	6.06421		6.43161		1.08076							1	-0.000160237	2.26173e-05	17.3795	3.87595	6.06408	0	6.43142	0	1.08065	0	0	0	0	0
Lab 3	Jul 21, 2020	2	5	iRM4	0.00015137	-8.88412e-06	0.000214101	7.2305e-05	0.000132893		0.000192013		0.000109294						2.01203e-05	3.50111e-05	17.3255	3.86402	6.04565		6.41224		1.07756							1	-0.000131249	4.38952e-05	17.3253	3.86395	6.04551	0	6.41205	0	1.07745	0	0	0	0	0
Lab 3	Jul 21, 2020	2	6	STD	0.00015137	-8.88412e-06	0.000214101	7.2305e-05	0.000132893		0.000192013		0.000109294						2.84596e-05	2.43411e-05	16.9773	3.78647	5.92429		6.28377		1.05603							1	-0.00012291	3.32252e-05	16.9771	3.7864	5.92416	0	6.28358	0	1.05592	0	0	0	0	0
Lab 3	Jul 21, 2020	2	7	iRM11	0.00015137	-8.88412e-06	0.000214101	7.2305e-05	0.000132893		0.000192013		0.000109294						-1.70203e-05	9.05846e-06	17.1907	3.83415	5.99923		6.36353		1.06949							1	-0.00016839	1.79426e-05	17.1905	3.83408	5.9991	0	6.36334	0	1.06938	0	0	0	0	0
Lab 3	Jul 21, 2020	2	8	STD	0.00015137	-8.88412e-06	0.000214101	7.2305e-05	0.000132893		0.000192013		0.000109294						2.0023e-06	-7.24233e-06	16.9202	3.77387	5.90497		6.26381		1.05277							1	-0.000149367	1.6418e-06	16.92	3.7738	5.90484	0	6.26362	0	1.05266	0	0	0	0	0
Lab 3	Jul 21, 2020	2	9	iRM6	0.00015137	-8.88412e-06	0.000214101	7.2305e-05	0.000132893		0.000192013		0.000109294						9.81009e-05	9.67597e-06	16.4968	3.6795	5.7574		6.10756		1.02656							1	-5.32688e-05	1.85601e-05	16.4966	3.67943	5.75727	0	6.10737	0	1.02645	0	0	0	0	0
Lab 3	Jul 21, 2020	2	10	STD	0.00015137	-8.88412e-06	0.000214101	7.2305e-05	0.000132893		0.000192013		0.000109294						-4.53898e-06	2.07625e-05	16.7302	3.73168	5.83904		6.19437		1.04118							1	-0.000155909	2.96467e-05	16.73	3.73161	5.83891	0	6.19418	0	1.04107	0	0	0	0	0
Lab 3	Jul 21, 2020	2	11	iRM10	0.00015137	-8.88412e-06	0.000214101	7.2305e-05	0.000132893		0.000192013		0.000109294						-3.36435e-06	2.61024e-05	16.8659	3.76204	5.88679		6.24531		1.04977							1	-0.000154734	3.49866e-05	16.8657	3.76197	5.88666	0	6.24512	0	1.04966	0	0	0	0	0
Lab 3	Jul 21, 2020	2	12	STD	0.00015137	-8.88412e-06	0.000214101	7.2305e-05	0.000132893		0.000192013		0.000109294						-7.00345e-06	3.28037e-05	16.7046	3.72609	5.83066		6.18591		1.03984							1	-0.000158373	4.16878e-05	16.7044	3.72602	5.83052	0	6.18572	0	1.03973	0	0	0	0	0
Lab 3	Jul 21, 2020	2	13	iRM4	0.00015137	-8.88412e-06	0.000214101	7.2305e-05	0.000132893		0.000192013		0.000109294						2.59581e-06	2.69301e-05	16.6029	3.7035	5.79535		6.14872		1.03361							1	-0.000148774	3.58142e-05	16.6027	3.70343	5.79522	0	6.14853	0	1.0335	0	0	0	0	0
Lab 3	Jul 21, 2020	2	14	STD	0.00015137	-8.88412e-06	0.000214101	7.2305e-05	0.000132893		0.000192013		0.000109294						-1.65271e-05	2.36488e-05	16.3032	3.63667	5.69086		6.03809		1.01503							1	-0.000167897	3.25329e-05	16.303	3.6366	5.69073	0	6.0379	0	1.01492	0	0	0	0	0
Lab 3	Jul 21, 2020	2	15	iRM11	0.00015137	-8.88412e-06	0.000214101	7.2305e-05	0.000132893		0.000192013		0.000109294						-2.39933e-05	2.53861e-05	16.5604	3.69415	5.78098		6.13395		1.03118							1	-0.000175363	3.42703e-05	16.5601	3.69408	5.78085	0	6.13376	0	1.03107	0	0	0	0	0
Lab 3	Jul 21, 2020	2	16	STD	0.00015137	-8.88412e-06	0.000214101	7.2305e-05	0.000132893		0.000192013		0.000109294						1.41085e-05	5.77937e-05	16.3246	3.64155	5.69882		6.04695		1.01661							1	-0.000137261	6.66779e-05	16.3244	3.64148	5.69869	0	6.04676	0	1.0165	0	0	0	0	0
Lab 3	Jul 21, 2020	2	17	iRM6	0.00015137	-8.88412e-06	0.000214101	7.2305e-05	0.000132893		0.000192013		0.000109294						7.30073e-05	3.65723e-06	15.8378	3.53305	5.5291		5.86719		0.986445							1	-7.83623e-05	1.25414e-05	15.8376	3.53298	5.52897	0	5.86699	0	0.986336	0	0	0	0	0
Lab 3	Jul 21, 2020	2	18	STD	0.00015137	-8.88412e-06	0.000214101	7.2305e-05	0.000132893		0.000192013		0.000109294						1.50185e-05	3.59839e-05	16.1101	3.59387	5.62443		5.96842		1.00346							1	-0.000136351	4.4868e-05	16.1099	3.5938	5.62429	0	5.96823	0	1.00335	0	0	0	0	0
Lab 3	Jul 21, 2020	2	19	iRM10	0.00015137	-8.88412e-06	0.000214101	7.2305e-05	0.000132893		0.000192013		0.000109294						-6.35218e-06	3.96095e-05	16.2116	3.61659	5.66001		6.00651		1.00991							1	-0.000157722	4.84936e-05	16.2113	3.61652	5.65988	0	6.00632	0	1.0098	0	0	0	0	0
Lab 3	Jul 21, 2020	2	20	STD	0.00015137	-8.88412e-06	0.000214101	7.2305e-05	0.000132893		0.000192013		0.000109294						-1.49318e-05	-1.17848e-05	16.0093	3.57147	5.58948		5.93176		0.997427							1	-0.000166301	-2.90066e-06	16.0091	3.5714	5.58934	0	5.93157	0	0.997318	0	0	0	0	0
Lab 3	Jul 21, 2020	2	21	iRM4	0.00015137	-8.88412e-06	0.000214101	7.2305e-05	0.000132893		0.000192013		0.000109294						4.09592e-06	4.20891e-05	16.0759	3.5864	5.613		5.95697		1.00165							1	-0.000147274	5.09732e-05	16.0757	3.58633	5.61286	0	5.95678	0	1.00154	0	0	0	0	0
Lab 3	Jul 21, 2020	2	22	STD	0.00015137	-8.88412e-06	0.000214101	7.2305e-05	0.000132893		0.000192013		0.000109294						2.34049e-05	5.11877e-05	15.8731	3.54125	5.54237		5.88223		0.989144							1	-0.000127965	6.00718e-05	15.8728	3.54118	5.54224	0	5.88203	0	0.989035	0	0	0	0	0
Lab 3	Jul 21, 2020	2	23	iRM11	0.00015137	-8.88412e-06	0.000214101	7.2305e-05	0.000132893		0.000192013		0.000109294						-3.24891e-05	9.03914e-06	15.9818	3.56554	5.58063		5.92307		0.996052							1	-0.000183859	1.79233e-05	15.9816	3.56547	5.5805	0	5.92288	0	0.995943	0	0	0	0	0
Lab 3	Jul 21, 2020	2	24	STD	0.00015137	-8.88412e-06	0.000214101	7.2305e-05	0.000132893		0.000192013		0.000109294						-3.24294e-05	4.30019e-05	15.5889	3.47794	5.4435		5.7777		0.97163							1	-0.000183799	5.1886e-05	15.5887	3.47787	5.44337	0	5.7775	0	0.971521	0	0	0	0	0
Lab 3	Jul 21, 2020	2	25	iRM6	0.00015137	-8.88412e-06	0.000214101	7.2305e-05	0.000132893		0.000192013		0.000109294						8.14358e-05	6.74545e-06	15.1597	3.38223	5.29385		5.61904		0.944993							1	-6.99338e-05	1.56296e-05	15.1595	3.38215	5.29371	0	5.61884	0	0.944884	0	0	0	0	0
Lab 3	Jul 21, 2020	2	26	STD	0.00015137	-8.88412e-06	0.000214101	7.2305e-05	0.000132893		0.000192013		0.000109294						-1.18239e-06	1.00427e-05	15.4666	3.4508	5.40125		5.73341		0.964238							1	-0.000152552	1.89268e-05	15.4664	3.45073	5.40112	0	5.73322	0	0.964129	0	0	0	0	0
Lab 3	Jul 21, 2020	2	27	iRM10	0.00015137	-8.88412e-06	0.000214101	7.2305e-05	0.000132893		0.000192013		0.000109294						-1.73146e-05	-5.81098e-06	15.4324	3.44324	5.38956		5.72113		0.962243							1	-0.000168684	3.07314e-06	15.4322	3.44316	5.38943	0	5.72094	0	0.962134	0	0	0	0	0
Lab 3	Jul 21, 2020	2	28	STD	0.00015137	-8.88412e-06	0.000214101	7.2305e-05	0.000132893		0.000192013		0.000109294						-5.47327e-05	2.16488e-05	15.3362	3.42187	5.35616		5.68591		0.956341							1	-0.000206102	3.05329e-05	15.336	3.4218	5.35603	0	5.68571	0	0.956232	0	0	0	0	0
Lab 3	Jul 21, 2020	2	29	iRM4	0.00015137	-8.88412e-06	0.000214101	7.2305e-05	0.000132893		0.000192013		0.000109294						-1.40459e-05	2.93115e-05	15.3156	3.41729	5.34916		5.67868		0.95513							1	-0.000165416	3.81956e-05	15.3154	3.41722	5.34903	0	5.67848	0	0.955021	0	0	0	0	0
Lab 3	Jul 21, 2020	2	30	STD	0.00015137	-8.88412e-06	0.000214101	7.2305e-05	0.000132893		0.000192013		0.000109294						-1.58907e-05	4.61508e-05	15.166	3.38407	5.2971		5.62354		0.945907							1	-0.00016726	5.50349e-05	15.1658	3.38399	5.29696	0	5.62335	0	0.945798	0	0	0	0	0
Lab 3	Jul 21, 2020	2	31	iRM11	0.00015137	-8.88412e-06	0.000214101	7.2305e-05	0.000132893		0.000192013		0.000109294						-1.96235e-05	1.48677e-05	15.3118	3.41659	5.34822		5.6781		0.955109							1	-0.000170993	2.37518e-05	15.3116	3.41651	5.34808	0	5.67791	0	0.954999	0	0	0	0	0
Lab 3	Jul 21, 2020	2	32	STD	0.00015137	-8.88412e-06	0.000214101	7.2305e-05	0.000132893		0.000192013		0.000109294						-1.82539e-05	3.30013e-05	15.1087	3.37136	5.27747		5.60313		0.942557							1	-0.000169624	4.18854e-05	15.1085	3.37128	5.27734	0	5.60294	0	0.942448	0	0	0	0	0
Lab 3	Jul 21, 2020	2	33	iRM6	0.00015137	-8.88412e-06	0.000214101	7.2305e-05	0.000132893		0.000192013		0.000109294						9.82657e-05	4.352e-06	14.6874	3.27736	5.13048		5.44723		0.916347							1	-5.3104e-05	1.32361e-05	14.6872	3.27729	5.13035	0	5.44703	0	0.916237	0	0	0	0	0
Lab 3	Jul 21, 2020	2	34	STD	0.00015137	-8.88412e-06	0.000214101	7.2305e-05	0.000132893		0.000192013		0.000109294						-4.98041e-05	9.21419e-07	14.9089	3.32688	5.20791		5.52972		0.930277							1	-0.000201174	9.80554e-06	14.9087	3.3268	5.20778	0	5.52952	0	0.930168	0	0	0	0	0
Lab 3	Jul 21, 2020	2	35	iRM10	0.00015137	-8.88412e-06	0.000214101	7.2305e-05	0.000132893		0.000192013		0.000109294						-4.39327e-06	1.36872e-05	14.9976	3.34672	5.23916		5.56305		0.935918							1	-0.000155763	2.25713e-05	14.9973	3.34665	5.23902	0	5.56286	0	0.935808	0	0	0	0	0
Lab 3	Jul 21, 2020	2	36	STD	0.00015137	-8.88412e-06	0.000214101	7.2305e-05	0.000132893		0.000192013		0.000109294						-1.47207e-05	2.24005e-05	14.9286	3.33136	5.21513		5.53772		0.931684							1	-0.00016609	3.12846e-05	14.9284	3.33129	5.215	0	5.53753	0	0.931575	0	0	0	0	0
Lab 3	Jul 21, 2020	2	37	iRM4	0.00015137	-8.88412e-06	0.000214101	7.2305e-05	0.000132893		0.000192013		0.000109294						-2.57656e-05	4.35671e-05	14.8816	3.32097	5.19891		5.52073		0.928805							1	-0.000177135	5.24513e-05	14.8813	3.32089	5.19878	0	5.52054	0	0.928696	0	0	0	0	0
Lab 3	Jul 21, 2020	2	38	STD	0.00015137	-8.88412e-06	0.000214101	7.2305e-05	0.000132893		0.000192013		0.000109294						-3.32702e-05	1.64868e-05	14.7416	3.28977	5.15023		5.46914		0.920193							1	-0.00018464	2.53709e-05	14.7414	3.2897	5.1501	0	5.46895	0	0.920084	0	0	0	0	0
Lab 3	Jul 21, 2020	2	39	iRM11	0.00015137	-8.88412e-06	0.000214101	7.2305e-05	0.000132893		0.000192013		0.000109294						-5.96902e-06	2.77983e-05	14.813	3.30573	5.17538		5.49596		0.924708							1	-0.000157339	3.66824e-05	14.8128	3.30566	5.17525	0	5.49577	0	0.924598	0	0	0	0	0
Lab 3	Jul 21, 2020	2	40	STD	0.00015137	-8.88412e-06	0.000214101	7.2305e-05	0.000132893		0.000192013		0.000109294						-5.90396e-05	1.24325e-05	14.5617	3.24971	5.08772		5.4031		0.909103							1	-0.000210409	2.13166e-05	14.5615	3.24964	5.08759	0	5.40291	0	0.908993	0	0	0	0	0
Lab 3	Jul 21, 2020	2	41	iRM6	0.00015137	-8.88412e-06	0.000214101	7.2305e-05	0.000132893		0.000192013		0.000109294						6.30334e-05	1.30281e-05	14.1688	3.16206	4.9506		5.25777		0.884704							1	-8.83363e-05	2.19122e-05	14.1686	3.16199	4.95047	0	5.25758	0	0.884594	0	0	0	0	0
Lab 3	Jul 21, 2020	2	42	STD	0.00015137	-8.88412e-06	0.000214101	7.2305e-05	0.000132893		0.000192013		0.000109294						-4.43235e-05	-7.90178e-07	14.3783	3.20891	5.02397		5.3358		0.897866							1	-0.000195693	8.09395e-06	14.378	3.20883	5.02383	0	5.33561	0	0.897756	0	0	0	0	0
Lab 3	Jul 21, 2020	2	43	iRM10	0.00015137	-8.88412e-06	0.000214101	7.2305e-05	0.000132893		0.000192013		0.000109294						-2.18655e-05	2.62773e-05	14.4123	3.21656	5.03607		5.34878		0.900091							1	-0.000173235	3.51615e-05	14.4121	3.21649	5.03594	0	5.34859	0	0.899982	0	0	0	0	0
Lab 3	Jul 21, 2020	2	44	STD	0.00015137	-8.88412e-06	0.000214101	7.2305e-05	0.000132893		0.000192013		0.000109294						-1.63248e-06	4.27592e-05	14.3344	3.19916	5.00889		5.32014		0.895295							1	-0.000153002	5.16433e-05	14.3342	3.19909	5.00875	0	5.31995	0	0.895186	0	0	0	0	0
Lab 3	Jul 21, 2020	2	45	iRM4	0.00015137	-8.88412e-06	0.000214101	7.2305e-05	0.000132893		0.000192013		0.000109294						-2.45744e-05	2.12815e-05	14.2648	3.18369	4.9848		5.29473		0.891038							1	-0.000175944	3.01656e-05	14.2646	3.18362	4.98467	0	5.29453	0	0.890928	0	0	0	0	0
Lab 3	Jul 21, 2020	2	46	STD	0.00015137	-8.88412e-06	0.000214101	7.2305e-05	0.000132893		0.000192013		0.000109294						-6.0599e-05	1.93206e-06	14.1176	3.15088	4.93351		5.24042		0.8819							1	-0.000211969	1.08162e-05	14.1174	3.15081	4.93338	0	5.24022	0	0.881791	0	0	0	0	0
Lab 3	Jul 21, 2020	2	47	iRM11	0.00015137	-8.88412e-06	0.000214101	7.2305e-05	0.000132893		0.000192013		0.000109294						-5.63054e-05	7.79193e-06	14.1523	3.15869	4.94585		5.25358		0.88415							1	-0.000207675	1.66761e-05	14.1521	3.15861	4.94572	0	5.25339	0	0.884041	0	0	0	0	0
Lab 3	Jul 21, 2020	2	48	STD	0.00015137	-8.88412e-06	0.000214101	7.2305e-05	0.000132893		0.000192013		0.000109294						-1.77402e-05	2.04162e-05	13.9476	3.11308	4.87436		5.17786		0.871454							1	-0.00016911	2.93003e-05	13.9474	3.11301	4.87423	0	5.17766	0	0.871344	0	0	0	0	0
Lab 3	Jul 21, 2020	2	49	iRM6	0.00015137	-8.88412e-06	0.000214101	7.2305e-05	0.000132893		0.000192013		0.000109294						0.000114319	2.16889e-05	13.6538	3.04749	4.77185		5.06913		0.853182							1	-3.7051e-05	3.0573e-05	13.6535	3.04742	4.77172	0	5.06894	0	0.853073	0	0	0	0	0
Lab 3	Jul 21, 2020	2	50	STD	0.00015137	-8.88412e-06	0.000214101	7.2305e-05	0.000132893		0.000192013		0.000109294						-4.77055e-05	2.2614e-05	13.8619	3.09404	4.84475		5.14669		0.866272							1	-0.000199075	3.14981e-05	13.8617	3.09397	4.84462	0	5.14649	0	0.866162	0	0	0	0	0
Lab 3	Jul 21, 2020	2	51	iRM10	0.00015137	-8.88412e-06	0.000214101	7.2305e-05	0.000132893		0.000192013		0.000109294						-3.56597e-05	1.67047e-05	13.9342	3.11023	4.87023		5.17391		0.870899							1	-0.000187029	2.55888e-05	13.934	3.11016	4.8701	0	5.17372	0	0.87079	0	0	0	0	0
Lab 3	Jul 21, 2020	2	52	STD	0.00015137	-8.88412e-06	0.000214101	7.2305e-05	0.000132893		0.000192013		0.000109294						-3.79041e-05	1.16335e-05	13.8528	3.09207	4.84189		5.14397		0.865849							1	-0.000189274	2.05176e-05	13.8526	3.092	4.84176	0	5.14378	0	0.86574	0	0	0	0	0
Lab 3	Jul 21, 2020	2	53	iRM4	0.00015137	-8.88412e-06	0.000214101	7.2305e-05	0.000132893		0.000192013		0.000109294						8.04342e-06	4.12787e-05	13.6622	3.04957	4.77533		5.07343		0.853972							1	-0.000143326	5.01628e-05	13.6619	3.0495	4.7752	0	5.07324	0	0.853863	0	0	0	0	0
Lab 3	Jul 21, 2020	2	54	STD	0.00015137	-8.88412e-06	0.000214101	7.2305e-05	0.000132893		0.000192013		0.000109294						-2.34301e-05	2.05335e-05	13.6835	3.05438	4.78297		5.08169		0.855422							1	-0.0001748	2.94176e-05	13.6833	3.05431	4.78284	0	5.0815	0	0.855313	0	0	0	0	0
Lab 3	Jul 21, 2020	2	55	iRM11	0.00015137	-8.88412e-06	0.000214101	7.2305e-05	0.000132893		0.000192013		0.000109294						-6.13524e-05	1.78865e-05	13.7194	3.06245	4.7957		5.09538		0.857722							1	-0.000212722	2.67706e-05	13.7191	3.06238	4.79557	0	5.09519	0	0.857613	0	0	0	0	0
Lab 3	Jul 21, 2020	2	56	STD	0.00015137	-8.88412e-06	0.000214101	7.2305e-05	0.000132893		0.000192013		0.000109294						-3.53263e-05	5.56986e-06	13.5453	3.02362	4.73493		5.03093		0.84691							1	-0.000186696	1.4454e-05	13.545	3.02355	4.7348	0	5.03074	0	0.846801	0	0	0	0	0
Lab 3	Jul 21, 2020	2	57	iRM6	0.00015137	-8.88412e-06	0.000214101	7.2305e-05	0.000132893		0.000192013		0.000109294						5.95458e-05	2.60372e-05	13.1949	2.9454	4.6126		4.90109		0.825095							1	-9.18239e-05	3.49213e-05	13.1946	2.94532	4.61247	0	4.9009	0	0.824985	0	0	0	0	0
Lab 3	Jul 21, 2020	2	58	STD	0.00015137	-8.88412e-06	0.000214101	7.2305e-05	0.000132893		0.000192013		0.000109294						-3.55206e-05	5.72476e-06	13.3793	2.98669	4.67711		4.96986		0.836697							1	-0.00018689	1.46089e-05	13.3791	2.98661	4.67698	0	4.96967	0	0.836588	0	0	0	0	0
Lab 3	Jul 21, 2020	2	59	iRM10	0.00015137	-8.88412e-06	0.000214101	7.2305e-05	0.000132893		0.000192013		0.000109294						-5.80673e-05	4.15094e-05	13.3821	2.98737	4.67837		4.97116		0.836932							1	-0.000209437	5.03936e-05	13.3819	2.9873	4.67823	0	4.97097	0	0.836823	0	0	0	0	0
Lab 3	Jul 21, 2020	2	60	STD	0.00015137	-8.88412e-06	0.000214101	7.2305e-05	0.000132893		0.000192013		0.000109294						-3.55639e-05	4.33987e-05	13.3313	2.97607	4.66066		4.95267		0.833854							1	-0.000186934	5.22828e-05	13.3311	2.976	4.66053	0	4.95248	0	0.833745	0	0	0	0	0
Lab 3	Jul 21, 2020	2	61	iRM4	0.00015137	-8.88412e-06	0.000214101	7.2305e-05	0.000132893		0.000192013		0.000109294						-3.21142e-05	8.40748e-06	13.1298	2.93108	4.59036		4.87804		0.821318							1	-0.000183484	1.72916e-05	13.1295	2.93101	4.59023	0	4.87785	0	0.821208	0	0	0	0	0
Lab 3	Jul 21, 2020	2	62	STD	0.00015137	-8.88412e-06	0.000214101	7.2305e-05	0.000132893		0.000192013		0.000109294						-3.49449e-05	1.56084e-05	13.1562	2.93703	4.59979		4.88825		0.823078							1	-0.000186315	2.44925e-05	13.156	2.93696	4.59966	0	4.88806	0	0.822969	0	0	0	0	0
Lab 3	Jul 21, 2020	2	63	iRM11	0.00015137	-8.88412e-06	0.000214101	7.2305e-05	0.000132893		0.000192013		0.000109294						-3.63274e-05	7.74719e-06	13.1697	2.94009	4.60465		4.89358		0.82398							1	-0.000187697	1.66313e-05	13.1695	2.94002	4.60452	0	4.89339	0	0.823871	0	0	0	0	0
Lab 3	Jul 21, 2020	2	64	STD	0.00015137	-8.88412e-06	0.000214101	7.2305e-05	0.000132893		0.000192013		0.000109294						-4.20606e-05	6.02178e-05	12.9962	2.90141	4.54409		4.82931		0.813171							1	-0.00019343	6.91019e-05	12.996	2.90134	4.54395	0	4.82912	0	0.813061	0	0	0	0	0
Lab 3	Jul 21, 2020	2	65	iRM6	0.00015137	-8.88412e-06	0.000214101	7.2305e-05	0.000132893		0.000192013		0.000109294						8.56069e-05	8.19429e-06	12.6866	2.83234	4.43601		4.71453		0.79386							1	-6.57628e-05	1.70784e-05	12.6864	2.83227	4.43588	0	4.71434	0	0.793751	0	0	0	0	0
Lab 3	Jul 21, 2020	2	66	STD	0.00015137	-8.88412e-06	0.000214101	7.2305e-05	0.000132893		0.000192013		0.000109294						-2.14134e-05	3.3711e-05	12.8371	2.86593	4.48871		4.77072		0.803341							1	-0.000172783	4.25951e-05	12.8369	2.86585	4.48858	0	4.77053	0	0.803231	0	0	0	0	0
Lab 3	Jul 21, 2020	2	67	iRM10	0.00015137	-8.88412e-06	0.000214101	7.2305e-05	0.000132893		0.000192013		0.000109294						-3.53621e-05	2.63453e-05	12.9041	2.88097	4.51229		4.79598		0.807628							1	-0.000186732	3.52294e-05	12.9039	2.88089	4.51216	0	4.79579	0	0.807519	0	0	0	0	0
Lab 3	Jul 21, 2020	2	68	STD	0.00015137	-8.88412e-06	0.000214101	7.2305e-05	0.000132893		0.000192013		0.000109294						-4.2743e-05	5.28497e-06	12.8355	2.86567	4.48842		4.77073		0.803421							1	-0.000194113	1.41691e-05	12.8352	2.8656	4.48829	0	4.77054	0	0.803311	0	0	0	0	0
Lab 3	Jul 21, 2020	2	69	iRM4	0.00015137	-8.88412e-06	0.000214101	7.2305e-05	0.000132893		0.000192013		0.000109294						-1.74962e-05	1.0438e-05	12.7767	2.85266	4.46804		4.74922		0.799787							1	-0.000168866	1.93221e-05	12.7764	2.85259	4.46791	0	4.74902	0	0.799678	0	0	0	0	0
Lab 3	Jul 21, 2020	2	70	STD	0.00015137	-8.88412e-06	0.000214101	7.2305e-05	0.000132893		0.000192013		0.000109294						-3.38441e-05	-1.1013e-05	12.7183	2.83962	4.44769		4.72772		0.796217							1	-0.000185214	-2.12889e-06	12.7181	2.83954	4.44756	0	4.72752	0	0.796108	0	0	0	0	0
Lab 3	Jul 21, 2020	2	71	iRM11	0.00015137	-8.88412e-06	0.000214101	7.2305e-05	0.000132893		0.000192013		0.000109294						-3.26225e-05	2.8091e-05	12.7994	2.85774	4.47629		4.75829		0.801393							1	-0.000183992	3.69752e-05	12.7992	2.85767	4.47615	0	4.75809	0	0.801283	0	0	0	0	0
Lab 3	Jul 21, 2020	2	72	STD	0.00015137	-8.88412e-06	0.000214101	7.2305e-05	0.000132893		0.000192013		0.000109294						-3.45976e-05	2.89108e-06	12.5634	2.80511	4.39384		4.67076		0.786697							1	-0.000185967	1.17752e-05	12.5632	2.80504	4.39371	0	4.67057	0	0.786588	0	0	0	0	0
Lab 3	Jul 22, 2020	3	2	STD	8.73222e-05	-1.26823e-05	0.000196033	5.21329e-05	0.000126678		0.000171008		8.0888e-05						3.57164e-05	2.90293e-05	12.661	2.82792	4.43108		4.71337		0.794332							1	-5.16058e-05	4.17116e-05	12.6608	2.82787	4.43096	0	4.7132	0	0.794252	0	0	0	0	0
Lab 3	Jul 22, 2020	3	3	iRM11	8.73222e-05	-1.26823e-05	0.000196033	5.21329e-05	0.000126678		0.000171008		8.0888e-05						1.52174e-05	3.52365e-05	12.592	2.81258	4.40706		4.68802		0.790094							1	-7.21047e-05	4.79188e-05	12.5918	2.81253	4.40694	0	4.68785	0	0.790013	0	0	0	0	0
Lab 3	Jul 22, 2020	3	4	STD	8.73222e-05	-1.26823e-05	0.000196033	5.21329e-05	0.000126678		0.000171008		8.0888e-05						1.12408e-05	3.05499e-05	12.5269	2.79808	4.38439		4.66404		0.786005							1	-7.60814e-05	4.32322e-05	12.5267	2.79803	4.38427	0	4.66387	0	0.785925	0	0	0	0	0
Lab 3	Jul 22, 2020	3	5	iRM5	8.73222e-05	-1.26823e-05	0.000196033	5.21329e-05	0.000126678		0.000171008		8.0888e-05						1.1064e-05	3.68058e-05	12.5385	2.80073	4.38862		4.66853		0.786801							1	-7.62581e-05	4.94881e-05	12.5383	2.80068	4.38849	0	4.66836	0	0.78672	0	0	0	0	0
Lab 3	Jul 22, 2020	3	6	STD	8.73222e-05	-1.26823e-05	0.000196033	5.21329e-05	0.000126678		0.000171008		8.0888e-05						6.62369e-06	5.99048e-05	12.475	2.78656	4.36643		4.64508		0.782858							1	-8.06985e-05	7.25871e-05	12.4748	2.78651	4.3663	0	4.64491	0	0.782777	0	0	0	0	0
Lab 3	Jul 22, 2020	3	7	iRM6	8.73222e-05	-1.26823e-05	0.000196033	5.21329e-05	0.000126678		0.000171008		8.0888e-05						3.88181e-05	3.58e-05	12.5164	2.79584	4.3811		4.6608		0.785581							1	-4.8504e-05	4.84823e-05	12.5162	2.79579	4.38098	0	4.66063	0	0.7855	0	0	0	0	0
Lab 3	Jul 22, 2020	3	8	STD	8.73222e-05	-1.26823e-05	0.000196033	5.21329e-05	0.000126678		0.000171008		8.0888e-05						4.5215e-05	3.43579e-05	12.4056	2.77105	4.34232		4.61964		0.778639							1	-4.21072e-05	4.70402e-05	12.4054	2.771	4.34219	0	4.61947	0	0.778558	0	0	0	0	0
Lab 3	Jul 22, 2020	3	9	iRM10	8.73222e-05	-1.26823e-05	0.000196033	5.21329e-05	0.000126678		0.000171008		8.0888e-05						6.13128e-05	3.19755e-05	12.5859	2.81142	4.40551		4.68703		0.790012							1	-2.60094e-05	4.46579e-05	12.5857	2.81136	4.40539	0	4.68686	0	0.789931	0	0	0	0	0
Lab 3	Jul 22, 2020	3	10	STD	8.73222e-05	-1.26823e-05	0.000196033	5.21329e-05	0.000126678		0.000171008		8.0888e-05						5.26096e-05	5.227e-05	12.3693	2.76306	4.32979		4.60648		0.776434							1	-3.47125e-05	6.49524e-05	12.3691	2.76301	4.32967	0	4.60631	0	0.776353	0	0	0	0	0
Lab 3	Jul 22, 2020	3	11	iRM11	8.73222e-05	-1.26823e-05	0.000196033	5.21329e-05	0.000126678		0.000171008		8.0888e-05						3.89801e-05	2.76078e-05	12.3112	2.75011	4.30951		4.58506		0.772826							1	-4.83421e-05	4.02901e-05	12.311	2.75006	4.30939	0	4.58489	0	0.772745	0	0	0	0	0
Lab 3	Jul 22, 2020	3	12	STD	8.73222e-05	-1.26823e-05	0.000196033	5.21329e-05	0.000126678		0.000171008		8.0888e-05						1.90718e-05	1.92185e-05	12.2441	2.73514	4.28614		4.56022		0.768689							1	-6.82503e-05	3.19009e-05	12.2439	2.73509	4.28601	0	4.56005	0	0.768608	0	0	0	0	0
Lab 3	Jul 22, 2020	3	13	iRM5	8.73222e-05	-1.26823e-05	0.000196033	5.21329e-05	0.000126678		0.000171008		8.0888e-05						2.45668e-05	3.89226e-05	12.2964	2.74684	4.30447		4.57994		0.772036							1	-6.27553e-05	5.16049e-05	12.2962	2.74678	4.30434	0	4.57977	0	0.771955	0	0	0	0	0
Lab 3	Jul 22, 2020	3	14	STD	8.73222e-05	-1.26823e-05	0.000196033	5.21329e-05	0.000126678		0.000171008		8.0888e-05						1.18358e-05	-9.86152e-06	12.199	2.72511	4.27052		4.54384		0.76594							1	-7.54864e-05	2.8208e-06	12.1988	2.72506	4.2704	0	4.54367	0	0.765859	0	0	0	0	0
Lab 3	Jul 22, 2020	3	15	iRM6	8.73222e-05	-1.26823e-05	0.000196033	5.21329e-05	0.000126678		0.000171008		8.0888e-05						4.18457e-05	5.80565e-06	12.2735	2.74175	4.29667		4.57174		0.77067							1	-4.54765e-05	1.8488e-05	12.2733	2.7417	4.29654	0	4.57157	0	0.770589	0	0	0	0	0
Lab 3	Jul 22, 2020	3	16	STD	8.73222e-05	-1.26823e-05	0.000196033	5.21329e-05	0.000126678		0.000171008		8.0888e-05						4.49972e-05	3.2681e-05	12.1504	2.71436	4.25369		4.5261		0.763013							1	-4.2325e-05	4.53633e-05	12.1502	2.71431	4.25356	0	4.52593	0	0.762932	0	0	0	0	0
Lab 3	Jul 22, 2020	3	17	iRM10	8.73222e-05	-1.26823e-05	0.000196033	5.21329e-05	0.000126678		0.000171008		8.0888e-05						7.15884e-05	9.55955e-06	12.3288	2.75421	4.31633		4.59281		0.774249							1	-1.57337e-05	2.22419e-05	12.3286	2.75416	4.3162	0	4.59263	0	0.774168	0	0	0	0	0
Lab 3	Jul 22, 2020	3	18	STD	8.73222e-05	-1.26823e-05	0.000196033	5.21329e-05	0.000126678		0.000171008		8.0888e-05						6.99742e-06	2.90804e-05	12.1084	2.705	4.23919		4.51087		0.760439							1	-8.03248e-05	4.17627e-05	12.1082	2.70495	4.23906	0	4.5107	0	0.760359	0	0	0	0	0
Lab 3	Jul 22, 2020	3	19	iRM11	8.73222e-05	-1.26823e-05	0.000196033	5.21329e-05	0.000126678		0.000171008		8.0888e-05						1.07587e-05	2.46663e-05	12.0587	2.69393	4.22183		4.49252		0.757363							1	-7.65635e-05	3.73486e-05	12.0585	2.69388	4.2217	0	4.49235	0	0.757283	0	0	0	0	0
Lab 3	Jul 22, 2020	3	20	STD	8.73222e-05	-1.26823e-05	0.000196033	5.21329e-05	0.000126678		0.000171008		8.0888e-05						2.45457e-05	1.0965e-05	11.9912	2.67893	4.19835		4.46761		0.753207							1	-6.27765e-05	2.36473e-05	11.991	2.67888	4.19822	0	4.46744	0	0.753126	0	0	0	0	0
Lab 3	Jul 22, 2020	3	21	iRM5	8.73222e-05	-1.26823e-05	0.000196033	5.21329e-05	0.000126678		0.000171008		8.0888e-05						1.98945e-05	2.26699e-05	12.0637	2.69506	4.22377		4.49474		0.757784							1	-6.74277e-05	3.53523e-05	12.0635	2.69501	4.22364	0	4.49457	0	0.757703	0	0	0	0	0
Lab 3	Jul 22, 2020	3	22	STD	8.73222e-05	-1.26823e-05	0.000196033	5.21329e-05	0.000126678		0.000171008		8.0888e-05						9.89662e-06	-9.79807e-07	11.9283	2.66485	4.1764		4.44451		0.749329							1	-7.74256e-05	1.17025e-05	11.9281	2.6648	4.17627	0	4.44434	0	0.749248	0	0	0	0	0
Lab 3	Jul 22, 2020	3	23	iRM6	8.73222e-05	-1.26823e-05	0.000196033	5.21329e-05	0.000126678		0.000171008		8.0888e-05						3.19686e-05	1.29693e-05	11.9725	2.67476	4.192		4.46112		0.752162							1	-5.53535e-05	2.56516e-05	11.9723	2.67471	4.19187	0	4.46095	0	0.752081	0	0	0	0	0
Lab 3	Jul 22, 2020	3	24	STD	8.73222e-05	-1.26823e-05	0.000196033	5.21329e-05	0.000126678		0.000171008		8.0888e-05						2.79221e-05	6.26174e-06	11.8543	2.64843	4.15072		4.41721		0.744751							1	-5.94001e-05	1.89441e-05	11.8541	2.64838	4.1506	0	4.41704	0	0.74467	0	0	0	0	0
Lab 3	Jul 22, 2020	3	25	iRM10	8.73222e-05	-1.26823e-05	0.000196033	5.21329e-05	0.000126678		0.000171008		8.0888e-05						6.06534e-05	3.19307e-05	12.0382	2.68947	4.21507		4.48567		0.756293							1	-2.66688e-05	4.4613e-05	12.038	2.68942	4.21494	0	4.4855	0	0.756212	0	0	0	0	0
Lab 3	Jul 22, 2020	3	26	STD	8.73222e-05	-1.26823e-05	0.000196033	5.21329e-05	0.000126678		0.000171008		8.0888e-05						2.27566e-05	2.54752e-05	11.8643	2.65061	4.15422		4.42083		0.74537							1	-6.45656e-05	3.81576e-05	11.8641	2.65055	4.15409	0	4.42066	0	0.745289	0	0	0	0	0
Lab 3	Jul 22, 2020	3	27	iRM11	8.73222e-05	-1.26823e-05	0.000196033	5.21329e-05	0.000126678		0.000171008		8.0888e-05						1.94793e-05	2.73749e-05	11.7626	2.62798	4.11879		4.38341		0.73909							1	-6.78429e-05	4.00572e-05	11.7624	2.62793	4.11867	0	4.38324	0	0.739009	0	0	0	0	0
Lab 3	Jul 22, 2020	3	28	STD	8.73222e-05	-1.26823e-05	0.000196033	5.21329e-05	0.000126678		0.000171008		8.0888e-05						2.25089e-05	-2.6536e-06	11.7608	2.62759	4.11821		4.38281		0.739014							1	-6.48132e-05	1.00287e-05	11.7606	2.62754	4.11809	0	4.38264	0	0.738934	0	0	0	0	0
Lab 3	Jul 22, 2020	3	29	iRM5	8.73222e-05	-1.26823e-05	0.000196033	5.21329e-05	0.000126678		0.000171008		8.0888e-05						2.35162e-05	1.1262e-05	11.8417	2.6457	4.14651		4.41297		0.744113							1	-6.3806e-05	2.39443e-05	11.8415	2.64565	4.14638	0	4.4128	0	0.744032	0	0	0	0	0
Lab 3	Jul 22, 2020	3	30	STD	8.73222e-05	-1.26823e-05	0.000196033	5.21329e-05	0.000126678		0.000171008		8.0888e-05						-1.20935e-05	2.46878e-05	11.7358	2.62199	4.10946		4.37364		0.737477							1	-9.94157e-05	3.73701e-05	11.7356	2.62193	4.10934	0	4.37347	0	0.737396	0	0	0	0	0
Lab 3	Jul 22, 2020	3	31	iRM6	8.73222e-05	-1.26823e-05	0.000196033	5.21329e-05	0.000126678		0.000171008		8.0888e-05						2.57782e-05	4.98012e-05	11.7972	2.63573	4.13103		4.39672		0.741379							1	-6.1544e-05	6.24835e-05	11.797	2.63568	4.13091	0	4.39654	0	0.741298	0	0	0	0	0
Lab 3	Jul 22, 2020	3	32	STD	8.73222e-05	-1.26823e-05	0.000196033	5.21329e-05	0.000126678		0.000171008		8.0888e-05						4.28182e-05	4.6517e-05	11.6337	2.59926	4.07398		4.33607		0.731194							1	-4.4504e-05	5.91993e-05	11.6335	2.59921	4.07385	0	4.3359	0	0.731113	0	0	0	0	0
Lab 3	Jul 22, 2020	3	33	iRM10	8.73222e-05	-1.26823e-05	0.000196033	5.21329e-05	0.000126678		0.000171008		8.0888e-05						7.30873e-05	5.20845e-05	11.7898	2.63418	4.12871		4.39452		0.741051							1	-1.42349e-05	6.47668e-05	11.7896	2.63412	4.12858	0	4.39434	0	0.74097	0	0	0	0	0
Lab 3	Jul 22, 2020	3	34	STD	8.73222e-05	-1.26823e-05	0.000196033	5.21329e-05	0.000126678		0.000171008		8.0888e-05						5.60946e-06	3.55693e-05	11.6012	2.59208	4.06283		4.32443		0.729223							1	-8.17127e-05	4.82516e-05	11.601	2.59203	4.0627	0	4.32426	0	0.729142	0	0	0	0	0
Lab 3	Jul 22, 2020	3	35	iRM11	8.73222e-05	-1.26823e-05	0.000196033	5.21329e-05	0.000126678		0.000171008		8.0888e-05						1.11204e-06	3.03772e-05	11.5634	2.58363	4.04956		4.31042		0.726894							1	-8.62101e-05	4.30595e-05	11.5632	2.58358	4.04943	0	4.31025	0	0.726813	0	0	0	0	0
Lab 3	Jul 22, 2020	3	36	STD	8.73222e-05	-1.26823e-05	0.000196033	5.21329e-05	0.000126678		0.000171008		8.0888e-05						2.75699e-05	2.83375e-05	11.5009	2.56971	4.02776		4.28728		0.723005							1	-5.97523e-05	4.10199e-05	11.5007	2.56966	4.02763	0	4.2871	0	0.722924	0	0	0	0	0
Lab 3	Jul 22, 2020	3	37	iRM5	8.73222e-05	-1.26823e-05	0.000196033	5.21329e-05	0.000126678		0.000171008		8.0888e-05						1.74644e-05	3.63785e-05	11.613	2.59473	4.06701		4.32897		0.73003							1	-6.98578e-05	4.90608e-05	11.6128	2.59468	4.06688	0	4.3288	0	0.729949	0	0	0	0	0
Lab 3	Jul 22, 2020	3	38	STD	8.73222e-05	-1.26823e-05	0.000196033	5.21329e-05	0.000126678		0.000171008		8.0888e-05						2.56392e-05	-6.90764e-06	11.5175	2.57339	4.03363		4.29349		0.724046							1	-6.1683e-05	5.77468e-06	11.5173	2.57334	4.0335	0	4.29332	0	0.723965	0	0	0	0	0
Lab 3	Jul 22, 2020	3	39	iRM6	8.73222e-05	-1.26823e-05	0.000196033	5.21329e-05	0.000126678		0.000171008		8.0888e-05						3.64362e-05	3.85774e-05	11.5536	2.58148	4.04635		4.30717		0.726387							1	-5.0886e-05	5.12597e-05	11.5534	2.58143	4.04622	0	4.307	0	0.726306	0	0	0	0	0
Lab 3	Jul 22, 2020	3	40	STD	8.73222e-05	-1.26823e-05	0.000196033	5.21329e-05	0.000126678		0.000171008		8.0888e-05						1.66925e-05	3.01887e-05	11.3967	2.54651	3.99159		4.24897		0.716561							1	-7.06297e-05	4.28711e-05	11.3965	2.54646	3.99146	0	4.2488	0	0.716481	0	0	0	0	0
Lab 3	Jul 22, 2020	3	41	iRM10	8.73222e-05	-1.26823e-05	0.000196033	5.21329e-05	0.000126678		0.000171008		8.0888e-05						8.81495e-05	1.12452e-05	11.5396	2.57842	4.04167		4.30239		0.725613							1	8.27365e-07	2.39275e-05	11.5394	2.57837	4.04154	0	4.30222	0	0.725532	0	0	0	0	0
Lab 3	Jul 22, 2020	3	42	STD	8.73222e-05	-1.26823e-05	0.000196033	5.21329e-05	0.000126678		0.000171008		8.0888e-05						4.81835e-07	2.60417e-05	11.3594	2.53823	3.97863		4.23538		0.714313							1	-8.68403e-05	3.8724e-05	11.3592	2.53818	3.97851	0	4.23521	0	0.714232	0	0	0	0	0
Lab 3	Jul 22, 2020	3	43	iRM11	8.73222e-05	-1.26823e-05	0.000196033	5.21329e-05	0.000126678		0.000171008		8.0888e-05						6.46848e-06	-3.16709e-06	11.3499	2.53611	3.97536		4.23202		0.713764							1	-8.08537e-05	9.51523e-06	11.3497	2.53606	3.97524	0	4.23185	0	0.713683	0	0	0	0	0
Lab 3	Jul 22, 2020	3	44	STD	8.73222e-05	-1.26823e-05	0.000196033	5.21329e-05	0.000126678		0.000171008		8.0888e-05						3.33548e-06	1.55236e-05	11.2882	2.52233	3.9538		4.20916		0.709948							1	-8.39867e-05	2.82059e-05	11.288	2.52228	3.95367	0	4.20899	0	0.709867	0	0	0	0	0
Lab 3	Jul 22, 2020	3	45	iRM5	8.73222e-05	-1.26823e-05	0.000196033	5.21329e-05	0.000126678		0.000171008		8.0888e-05						5.31194e-06	1.01643e-06	11.3635	2.53918	3.98026		4.23734		0.714695							1	-8.20102e-05	1.36987e-05	11.3633	2.53913	3.98013	0	4.23717	0	0.714614	0	0	0	0	0
Lab 3	Jul 22, 2020	3	46	STD	8.73222e-05	-1.26823e-05	0.000196033	5.21329e-05	0.000126678		0.000171008		8.0888e-05						-4.75799e-06	1.52816e-07	11.2615	2.5164	3.94458		4.19948		0.708324							1	-9.20802e-05	1.28351e-05	11.2613	2.51635	3.94446	0	4.19931	0	0.708243	0	0	0	0	0
Lab 3	Jul 22, 2020	3	47	iRM6	8.73222e-05	-1.26823e-05	0.000196033	5.21329e-05	0.000126678		0.000171008		8.0888e-05						2.38452e-05	3.41133e-05	11.3102	2.52731	3.96176		4.21782		0.711415							1	-6.34769e-05	4.67956e-05	11.31	2.52726	3.96164	0	4.21765	0	0.711334	0	0	0	0	0
Lab 3	Jul 22, 2020	3	48	STD	8.73222e-05	-1.26823e-05	0.000196033	5.21329e-05	0.000126678		0.000171008		8.0888e-05						6.24596e-06	5.13525e-05	11.1772	2.49757	3.91518		4.16823		0.7031							1	-8.10762e-05	6.40348e-05	11.177	2.49752	3.91506	0	4.16806	0	0.703019	0	0	0	0	0
Lab 3	Jul 22, 2020	3	49	iRM10	8.73222e-05	-1.26823e-05	0.000196033	5.21329e-05	0.000126678		0.000171008		8.0888e-05						9.22366e-05	2.12642e-05	9.48292	2.11902	3.3218		3.53659		0.596513							1	4.91439e-06	3.39465e-05	9.48272	2.11896	3.32167	0	3.53641	0	0.596432	0	0	0	0	0
Lab 3	Jul 22, 2020	3	50	STD	8.73222e-05	-1.26823e-05	0.000196033	5.21329e-05	0.000126678		0.000171008		8.0888e-05						1.33485e-05	3.10629e-05	11.1639	2.49471	3.91061		4.16359		0.702274							1	-7.39736e-05	4.37452e-05	11.1637	2.49466	3.91049	0	4.16342	0	0.702194	0	0	0	0	0
Lab 3	Jul 22, 2020	3	51	iRM11	8.73222e-05	-1.26823e-05	0.000196033	5.21329e-05	0.000126678		0.000171008		8.0888e-05						-1.8335e-05	4.44511e-05	11.151	2.49181	3.90618		4.15882		0.70152							1	-0.000105657	5.71335e-05	11.1508	2.49176	3.90606	0	4.15865	0	0.701439	0	0	0	0	0
Lab 3	Jul 22, 2020	3	52	STD	8.73222e-05	-1.26823e-05	0.000196033	5.21329e-05	0.000126678		0.000171008		8.0888e-05						9.0046e-06	6.80016e-06	11.0931	2.47886	3.88593		4.13741		0.697921							1	-7.83176e-05	1.94825e-05	11.0929	2.47881	3.88581	0	4.13724	0	0.69784	0	0	0	0	0
Lab 3	Jul 22, 2020	3	53	iRM5	8.73222e-05	-1.26823e-05	0.000196033	5.21329e-05	0.000126678		0.000171008		8.0888e-05						4.29628e-05	4.89882e-05	11.1517	2.49199	3.90656		4.15942		0.701643							1	-4.43593e-05	6.16705e-05	11.1515	2.49194	3.90643	0	4.15925	0	0.701563	0	0	0	0	0
Lab 3	Jul 22, 2020	3	54	STD	8.73222e-05	-1.26823e-05	0.000196033	5.21329e-05	0.000126678		0.000171008		8.0888e-05						-5.44688e-06	2.07648e-05	11.0023	2.45868	3.85429		4.10379		0.692277							1	-9.27691e-05	3.34471e-05	11.0021	2.45862	3.85416	0	4.10362	0	0.692196	0	0	0	0	0
Lab 3	Jul 22, 2020	3	55	iRM6	8.73222e-05	-1.26823e-05	0.000196033	5.21329e-05	0.000126678		0.000171008		8.0888e-05						2.10276e-05	6.68021e-07	11.0968	2.47982	3.88755		4.13928		0.698246							1	-6.62945e-05	1.33503e-05	11.0966	2.47976	3.88742	0	4.13911	0	0.698165	0	0	0	0	0
Lab 3	Jul 22, 2020	3	56	STD	8.73222e-05	-1.26823e-05	0.000196033	5.21329e-05	0.000126678		0.000171008		8.0888e-05						2.09888e-05	2.01233e-05	10.9377	2.44423	3.83176		4.08003		0.688278							1	-6.63334e-05	3.28057e-05	10.9375	2.44417	3.83164	0	4.07986	0	0.688197	0	0	0	0	0
Lab 3	Jul 29, 2020	4	2	STD	0.000131112	-5.52759e-06	0.000133198	4.74865e-05	0.00011459		0.000156498		8.49591e-05						-5.18521e-06	4.8276e-05	17.2141	3.84509	6.02512		6.40968		1.08024							1	-0.000136297	5.38035e-05	17.214	3.84504	6.02501	0	6.40952	0	1.08016	0	0	0	0	0
Lab 3	Jul 29, 2020	4	3	iRM6	0.000131112	-5.52759e-06	0.000133198	4.74865e-05	0.00011459		0.000156498		8.49591e-05						-2.19721e-05	3.36378e-05	16.9787	3.7926	5.94279		6.32214		1.06552							1	-0.000153084	3.91654e-05	16.9786	3.79256	5.94267	0	6.32199	0	1.06544	0	0	0	0	0
Lab 3	Jul 29, 2020	4	4	STD	0.000131112	-5.52759e-06	0.000133198	4.74865e-05	0.00011459		0.000156498		8.49591e-05						-4.69498e-05	3.083e-05	17.1661	3.83444	6.00842		6.39189		1.07728							1	-0.000178062	3.63576e-05	17.166	3.83439	6.0083	0	6.39173	0	1.07719	0	0	0	0	0
Lab 3	Jul 29, 2020	4	5	iRM11	0.000131112	-5.52759e-06	0.000133198	4.74865e-05	0.00011459		0.000156498		8.49591e-05						5.58516e-06	4.45454e-05	17.2561	3.85451	6.0399		6.42541		1.08298							1	-0.000125527	5.0073e-05	17.2559	3.85446	6.03978	0	6.42525	0	1.0829	0	0	0	0	0
Lab 3	Jul 29, 2020	4	6	STD	0.000131112	-5.52759e-06	0.000133198	4.74865e-05	0.00011459		0.000156498		8.49591e-05						-1.59862e-05	-2.19495e-06	17.3666	3.87918	6.07853		6.46658		1.08995							1	-0.000147098	3.33264e-06	17.3664	3.87913	6.07841	0	6.46642	0	1.08986	0	0	0	0	0
Lab 3	Jul 29, 2020	4	7	iRM6	0.000131112	-5.52759e-06	0.000133198	4.74865e-05	0.00011459		0.000156498		8.49591e-05						8.47696e-05	7.04725e-06	17.5528	3.9208	6.14373		6.53599		1.10159							1	-4.63423e-05	1.25748e-05	17.5527	3.92075	6.14362	0	6.53584	0	1.10151	0	0	0	0	0
Lab 3	Jul 29, 2020	4	8	STD	0.000131112	-5.52759e-06	0.000133198	4.74865e-05	0.00011459		0.000156498		8.49591e-05						-2.99081e-05	2.14557e-05	17.2503	3.85325	6.03789		6.42334		1.08259							1	-0.00016102	2.69832e-05	17.2502	3.8532	6.03777	0	6.42319	0	1.0825	0	0	0	0	0
Lab 3	Jul 29, 2020	4	9	iRM11	0.000131112	-5.52759e-06	0.000133198	4.74865e-05	0.00011459		0.000156498		8.49591e-05						-8.96641e-06	3.07078e-05	17.0072	3.79902	5.95286		6.33293		1.06737							1	-0.000140078	3.62354e-05	17.0071	3.79897	5.95274	0	6.33277	0	1.06729	0	0	0	0	0
Lab 3	Jul 29, 2020	4	10	STD	0.000131112	-5.52759e-06	0.000133198	4.74865e-05	0.00011459		0.000156498		8.49591e-05						-1.36525e-05	2.43689e-05	17.1136	3.82271	5.99011		6.37254		1.07403							1	-0.000144765	2.98965e-05	17.1135	3.82267	5.98999	0	6.37239	0	1.07394	0	0	0	0	0
Lab 3	Jul 29, 2020	4	11	iRM6	0.000131112	-5.52759e-06	0.000133198	4.74865e-05	0.00011459		0.000156498		8.49591e-05						1.33284e-05	1.03923e-05	17.1951	3.84097	6.01872		6.40299		1.07919							1	-0.000117784	1.59199e-05	17.1949	3.84092	6.01861	0	6.40283	0	1.0791	0	0	0	0	0
Lab 3	Jul 29, 2020	4	12	STD	0.000131112	-5.52759e-06	0.000133198	4.74865e-05	0.00011459		0.000156498		8.49591e-05						-2.82608e-06	1.68688e-05	17.2917	3.86253	6.0525		6.43894		1.08525							1	-0.000133938	2.23964e-05	17.2916	3.86248	6.05238	0	6.43879	0	1.08516	0	0	0	0	0
Lab 3	Jul 29, 2020	4	13	iRM11	0.000131112	-5.52759e-06	0.000133198	4.74865e-05	0.00011459		0.000156498		8.49591e-05						4.59279e-05	2.10619e-06	17.4057	3.88798	6.09243		6.48145		1.09241							1	-8.51841e-05	7.63377e-06	17.4056	3.88794	6.09231	0	6.48129	0	1.09232	0	0	0	0	0
Lab 3	Jul 29, 2020	4	14	STD	0.000131112	-5.52759e-06	0.000133198	4.74865e-05	0.00011459		0.000156498		8.49591e-05						-7.75187e-06	2.36085e-05	17.0129	3.80025	5.95498		6.33532		1.06779							1	-0.000138864	2.91361e-05	17.0127	3.8002	5.95487	0	6.33517	0	1.06771	0	0	0	0	0
Lab 3	Jul 29, 2020	4	15	iRM6	0.000131112	-5.52759e-06	0.000133198	4.74865e-05	0.00011459		0.000156498		8.49591e-05						-7.70255e-06	8.78036e-06	16.848	3.76345	5.89731		6.27395		1.05747							1	-0.000138815	1.43079e-05	16.8479	3.7634	5.89719	0	6.2738	0	1.05738	0	0	0	0	0
Lab 3	Jul 29, 2020	4	16	STD	0.000131112	-5.52759e-06	0.000133198	4.74865e-05	0.00011459		0.000156498		8.49591e-05						-3.96309e-05	1.073e-05	16.9638	3.78934	5.93782		6.31711		1.06475							1	-0.000170743	1.62576e-05	16.9637	3.78929	5.93771	0	6.31695	0	1.06466	0	0	0	0	0
Lab 3	Jul 29, 2020	4	17	iRM11	0.000131112	-5.52759e-06	0.000133198	4.74865e-05	0.00011459		0.000156498		8.49591e-05						-3.23849e-05	5.1511e-05	16.9852	3.79414	5.94535		6.32516		1.06612							1	-0.000163497	5.70386e-05	16.9851	3.79409	5.94523	0	6.32501	0	1.06604	0	0	0	0	0
Lab 3	Jul 29, 2020	4	18	STD	0.000131112	-5.52759e-06	0.000133198	4.74865e-05	0.00011459		0.000156498		8.49591e-05						3.21929e-06	3.70519e-05	17.0935	3.81838	5.98322		6.36556		1.07291							1	-0.000127893	4.25795e-05	17.0933	3.81833	5.9831	0	6.3654	0	1.07282	0	0	0	0	0
Lab 3	Jul 29, 2020	4	19	iRM6	0.000131112	-5.52759e-06	0.000133198	4.74865e-05	0.00011459		0.000156498		8.49591e-05						4.22516e-05	3.94176e-06	17.3014	3.86477	6.05609		6.44311		1.08599							1	-8.88603e-05	9.46934e-06	17.3013	3.86472	6.05598	0	6.44295	0	1.08591	0	0	0	0	0
Lab 3	Jul 29, 2020	4	20	STD	0.000131112	-5.52759e-06	0.000133198	4.74865e-05	0.00011459		0.000156498		8.49591e-05						1.24287e-05	4.17697e-06	16.9664	3.78991	5.93889		6.31837		1.06495							1	-0.000118683	9.70456e-06	16.9663	3.78986	5.93878	0	6.31822	0	1.06487	0	0	0	0	0
Lab 3	Jul 29, 2020	4	21	iRM11	0.000131112	-5.52759e-06	0.000133198	4.74865e-05	0.00011459		0.000156498		8.49591e-05						-2.57851e-05	2.65583e-05	16.7502	3.74167	5.86326		6.23798		1.05143							1	-0.000156897	3.20859e-05	16.7501	3.74163	5.86314	0	6.23783	0	1.05134	0	0	0	0	0
Lab 3	Jul 29, 2020	4	22	STD	0.000131112	-5.52759e-06	0.000133198	4.74865e-05	0.00011459		0.000156498		8.49591e-05						-1.99581e-05	3.23377e-05	16.8961	3.77425	5.91434		6.29232		1.06061							1	-0.00015107	3.78653e-05	16.896	3.7742	5.91423	0	6.29216	0	1.06052	0	0	0	0	0
Lab 3	Jul 29, 2020	4	23	iRM6	0.000131112	-5.52759e-06	0.000133198	4.74865e-05	0.00011459		0.000156498		8.49591e-05						-1.70908e-05	2.15749e-05	16.9438	3.78489	5.93105		6.31014		1.06361							1	-0.000148203	2.71024e-05	16.9436	3.78484	5.93093	0	6.30998	0	1.06353	0	0	0	0	0
Lab 3	Jul 29, 2020	4	24	STD	0.000131112	-5.52759e-06	0.000133198	4.74865e-05	0.00011459		0.000156498		8.49591e-05						-1.50397e-05	5.09535e-05	17.0543	3.80961	5.96983		6.35139		1.07056							1	-0.000146152	5.64811e-05	17.0542	3.80956	5.96971	0	6.35123	0	1.07047	0	0	0	0	0
Lab 3	Jul 29, 2020	4	25	iRM11	0.000131112	-5.52759e-06	0.000133198	4.74865e-05	0.00011459		0.000156498		8.49591e-05						9.10797e-05	1.65369e-05	17.2108	3.84458	6.02458		6.40977		1.08043							1	-4.00323e-05	2.20645e-05	17.2107	3.84453	6.02446	0	6.40961	0	1.08035	0	0	0	0	0
Lab 3	Jul 29, 2020	4	26	STD	0.000131112	-5.52759e-06	0.000133198	4.74865e-05	0.00011459		0.000156498		8.49591e-05						-1.27238e-05	-2.84896e-06	16.8431	3.76242	5.89588		6.27289		1.05735							1	-0.000143836	2.67862e-06	16.8429	3.76237	5.89577	0	6.27274	0	1.05727	0	0	0	0	0
Lab 3	Jul 29, 2020	4	27	iRM6	0.000131112	-5.52759e-06	0.000133198	4.74865e-05	0.00011459		0.000156498		8.49591e-05						-4.33105e-06	6.10558e-06	16.6206	3.71276	5.818		6.19015		1.04341							1	-0.000135443	1.16332e-05	16.6204	3.71271	5.81789	0	6.19	0	1.04332	0	0	0	0	0
Lab 3	Jul 29, 2020	4	28	STD	0.000131112	-5.52759e-06	0.000133198	4.74865e-05	0.00011459		0.000156498		8.49591e-05						-2.04803e-05	1.39294e-05	16.8004	3.75298	5.88107		6.25717		1.05471							1	-0.000151592	1.9457e-05	16.8003	3.75293	5.88095	0	6.25702	0	1.05462	0	0	0	0	0
Lab 3	Jul 29, 2020	4	29	iRM11	0.000131112	-5.52759e-06	0.000133198	4.74865e-05	0.00011459		0.000156498		8.49591e-05						-2.49391e-05	5.02962e-05	16.8163	3.75651	5.88667		6.26325		1.05571							1	-0.000156051	5.58238e-05	16.8162	3.75646	5.88655	0	6.26309	0	1.05563	0	0	0	0	0
Lab 3	Jul 29, 2020	4	30	STD	0.000131112	-5.52759e-06	0.000133198	4.74865e-05	0.00011459		0.000156498		8.49591e-05						-1.88058e-05	1.51872e-05	16.8697	3.76841	5.90539		6.28317		1.0591							1	-0.000149918	2.07148e-05	16.8695	3.76836	5.90527	0	6.28301	0	1.05902	0	0	0	0	0
Lab 3	Jul 29, 2020	4	31	iRM6	0.000131112	-5.52759e-06	0.000133198	4.74865e-05	0.00011459		0.000156498		8.49591e-05						3.57037e-05	1.95609e-05	17.0551	3.80984	5.97033		6.35231		1.07076							1	-9.54082e-05	2.50885e-05	17.0549	3.8098	5.97022	0	6.35215	0	1.07068	0	0	0	0	0
Lab 3	Jul 29, 2020	4	32	STD	0.000131112	-5.52759e-06	0.000133198	4.74865e-05	0.00011459		0.000156498		8.49591e-05						8.17734e-06	-3.3507e-06	16.6342	3.71584	5.82301		6.19565		1.04439							1	-0.000122935	2.17688e-06	16.6341	3.7158	5.8229	0	6.19549	0	1.04431	0	0	0	0	0
Lab 3	Jul 29, 2020	4	33	iRM11	0.000131112	-5.52759e-06	0.000133198	4.74865e-05	0.00011459		0.000156498		8.49591e-05						-4.13489e-05	2.15918e-05	16.3827	3.65974	5.73512		6.10215		1.02864							1	-0.000172461	2.71194e-05	16.3826	3.6597	5.735	0	6.102	0	1.02856	0	0	0	0	0
Lab 3	Jul 29, 2020	4	34	STD	0.000131112	-5.52759e-06	0.000133198	4.74865e-05	0.00011459		0.000156498		8.49591e-05						-1.77075e-05	7.84562e-06	16.5566	3.69853	5.79596		6.16691		1.03958							1	-0.000148819	1.33732e-05	16.5564	3.69848	5.79585	0	6.16675	0	1.0395	0	0	0	0	0
Lab 3	Jul 29, 2020	4	35	iRM6	0.000131112	-5.52759e-06	0.000133198	4.74865e-05	0.00011459		0.000156498		8.49591e-05						3.22717e-08	2.17341e-05	16.6272	3.7143	5.82067		6.19327		1.04397							1	-0.00013108	2.72617e-05	16.627	3.71425	5.82055	0	6.19312	0	1.04389	0	0	0	0	0
Lab 3	Jul 29, 2020	4	36	STD	0.000131112	-5.52759e-06	0.000133198	4.74865e-05	0.00011459		0.000156498		8.49591e-05						-2.61076e-05	2.01039e-05	16.7497	3.74173	5.86367		6.23894		1.05169							1	-0.00015722	2.56315e-05	16.7496	3.74168	5.86355	0	6.23878	0	1.05161	0	0	0	0	0
Lab 3	Jul 29, 2020	4	37	iRM11	0.000131112	-5.52759e-06	0.000133198	4.74865e-05	0.00011459		0.000156498		8.49591e-05						8.03998e-05	3.06566e-05	16.9997	3.79756	5.95111		6.33208		1.06741							1	-5.07121e-05	3.61842e-05	16.9996	3.79751	5.951	0	6.33192	0	1.06733	0	0	0	0	0
Lab 3	Jul 29, 2020	4	38	STD	0.000131112	-5.52759e-06	0.000133198	4.74865e-05	0.00011459		0.000156498		8.49591e-05						8.48118e-06	4.29959e-05	16.6345	3.71598	5.8233		6.19605		1.0445							1	-0.000122631	4.85235e-05	16.6343	3.71593	5.82318	0	6.1959	0	1.04441	0	0	0	0	0
Lab 3	Jul 30, 2020	5	2	STD	9.5859e-05	-2.61727e-06	0.000107134	4.56211e-05	6.98415e-05		0.000145886		7.22353e-05						5.2276e-05	2.31582e-06	15.4744	3.45777	5.42025		5.77016		0.97315							1	-4.3583e-05	4.93309e-06	15.4743	3.45772	5.42018	0	5.77002	0	0.973078	0	0	0	0	0
Lab 3	Jul 30, 2020	5	3	iRM4	9.5859e-05	-2.61727e-06	0.000107134	4.56211e-05	6.98415e-05		0.000145886		7.22353e-05						9.42992e-06	-2.96972e-07	15.7933	3.52909	5.53202		5.88924		0.993274							1	-8.64291e-05	2.3203e-06	15.7932	3.52904	5.53195	0	5.8891	0	0.993201	0	0	0	0	0
Lab 3	Jul 30, 2020	5	4	STD	9.5859e-05	-2.61727e-06	0.000107134	4.56211e-05	6.98415e-05		0.000145886		7.22353e-05						5.58061e-05	-1.4092e-05	15.5298	3.47021	5.43974		5.79107		0.976729							1	-4.00529e-05	-1.14747e-05	15.5297	3.47017	5.43967	0	5.79093	0	0.976657	0	0	0	0	0
Lab 3	Jul 30, 2020	5	5	iRM5	9.5859e-05	-2.61727e-06	0.000107134	4.56211e-05	6.98415e-05		0.000145886		7.22353e-05						-8.85603e-06	1.15033e-07	15.4313	3.44822	5.40524		5.75434		0.970553							1	-0.000104715	2.7323e-06	15.4312	3.44818	5.40517	0	5.7542	0	0.970481	0	0	0	0	0
Lab 3	Jul 30, 2020	5	6	STD	9.5859e-05	-2.61727e-06	0.000107134	4.56211e-05	6.98415e-05		0.000145886		7.22353e-05						5.25872e-05	3.81076e-05	15.5022	3.46404	5.43013		5.78089		0.975014							1	-4.32718e-05	4.07249e-05	15.5021	3.464	5.43006	0	5.78075	0	0.974942	0	0	0	0	0
Lab 3	Jul 30, 2020	5	7	iRM10	9.5859e-05	-2.61727e-06	0.000107134	4.56211e-05	6.98415e-05		0.000145886		7.22353e-05						9.18222e-06	-1.68907e-05	15.667	3.50094	5.48793		5.8425		0.985413							1	-8.66768e-05	-1.42734e-05	15.6669	3.5009	5.48786	0	5.84236	0	0.985341	0	0	0	0	0
Lab 3	Jul 30, 2020	5	8	STD	9.5859e-05	-2.61727e-06	0.000107134	4.56211e-05	6.98415e-05		0.000145886		7.22353e-05						2.34052e-05	6.07795e-06	15.359	3.43212	5.38007		5.72769		0.966076							1	-7.24537e-05	8.69522e-06	15.3589	3.43207	5.38	0	5.72755	0	0.966004	0	0	0	0	0
Lab 3	Jul 30, 2020	5	9	iRM10#2	9.5859e-05	-2.61727e-06	0.000107134	4.56211e-05	6.98415e-05		0.000145886		7.22353e-05						5.84677e-05	-5.18814e-07	15.4938	3.46224	5.42735		5.77809		0.974556							1	-3.73913e-05	2.09846e-06	15.4937	3.4622	5.42728	0	5.77795	0	0.974484	0	0	0	0	0
Lab 3	Jul 30, 2020	5	10	STD	9.5859e-05	-2.61727e-06	0.000107134	4.56211e-05	6.98415e-05		0.000145886		7.22353e-05						5.3135e-05	2.3721e-05	15.179	3.39191	5.31711		5.66069		0.954809							1	-4.2724e-05	2.63383e-05	15.1789	3.39186	5.31704	0	5.66054	0	0.954737	0	0	0	0	0
Lab 3	Jul 30, 2020	5	11	iRM4	9.5859e-05	-2.61727e-06	0.000107134	4.56211e-05	6.98415e-05		0.000145886		7.22353e-05						1.70223e-05	1.60968e-05	15.4996	3.46354	5.42952		5.78053		0.974982							1	-7.88367e-05	1.87141e-05	15.4995	3.46349	5.42945	0	5.78039	0	0.97491	0	0	0	0	0
Lab 3	Jul 30, 2020	5	12	STD	9.5859e-05	-2.61727e-06	0.000107134	4.56211e-05	6.98415e-05		0.000145886		7.22353e-05						1.53502e-05	2.31724e-05	15.3017	3.41931	5.36016		5.7067		0.962549							1	-8.05088e-05	2.57896e-05	15.3016	3.41926	5.36009	0	5.70655	0	0.962477	0	0	0	0	0
Lab 3	Jul 30, 2020	5	13	iRM5	9.5859e-05	-2.61727e-06	0.000107134	4.56211e-05	6.98415e-05		0.000145886		7.22353e-05						4.89518e-06	2.24353e-05	15.1222	3.37923	5.2973		5.6398		0.951247							1	-9.09638e-05	2.50525e-05	15.1221	3.37918	5.29723	0	5.63966	0	0.951175	0	0	0	0	0
Lab 3	Jul 30, 2020	5	14	STD	9.5859e-05	-2.61727e-06	0.000107134	4.56211e-05	6.98415e-05		0.000145886		7.22353e-05						-1.68583e-06	2.23352e-05	15.1872	3.39379	5.32009		5.66422		0.955378							1	-9.75448e-05	2.49525e-05	15.1871	3.39375	5.32002	0	5.66407	0	0.955306	0	0	0	0	0
Lab 3	Jul 30, 2020	5	15	iRM10	9.5859e-05	-2.61727e-06	0.000107134	4.56211e-05	6.98415e-05		0.000145886		7.22353e-05						-1.77994e-06	3.19003e-06	15.3425	3.42851	5.37456		5.72223		0.965209							1	-9.76389e-05	5.8073e-06	15.3424	3.42846	5.37449	0	5.72208	0	0.965137	0	0	0	0	0
Lab 3	Jul 30, 2020	5	16	STD	9.5859e-05	-2.61727e-06	0.000107134	4.56211e-05	6.98415e-05		0.000145886		7.22353e-05						6.1753e-05	2.59975e-05	15.0683	3.36719	5.27858		5.61998		0.947988							1	-3.4106e-05	2.86148e-05	15.0682	3.36714	5.27851	0	5.61983	0	0.947916	0	0	0	0	0
Lab 3	Jul 30, 2020	5	17	iRM10#2	9.5859e-05	-2.61727e-06	0.000107134	4.56211e-05	6.98415e-05		0.000145886		7.22353e-05						6.89036e-05	8.22271e-06	15.1991	3.39643	5.32438		5.66881		0.956189							1	-2.69554e-05	1.084e-05	15.1989	3.39639	5.32431	0	5.66867	0	0.956117	0	0	0	0	0
Lab 3	Jul 30, 2020	5	18	STD	9.5859e-05	-2.61727e-06	0.000107134	4.56211e-05	6.98415e-05		0.000145886		7.22353e-05						4.06491e-05	3.35572e-05	14.9614	3.34338	5.24118		5.58026		0.941219							1	-5.52098e-05	3.61745e-05	14.9613	3.34333	5.24111	0	5.58012	0	0.941147	0	0	0	0	0
Lab 3	Jul 30, 2020	5	19	iRM4	9.5859e-05	-2.61727e-06	0.000107134	4.56211e-05	6.98415e-05		0.000145886		7.22353e-05						2.78074e-06	7.38443e-06	15.2163	3.40035	5.33052		5.67545		0.957323							1	-9.30782e-05	1.00017e-05	15.2162	3.4003	5.33045	0	5.6753	0	0.957251	0	0	0	0	0
Lab 3	Jul 30, 2020	5	20	STD	9.5859e-05	-2.61727e-06	0.000107134	4.56211e-05	6.98415e-05		0.000145886		7.22353e-05						1.73213e-05	-3.10483e-05	15.0335	3.35954	5.2665		5.60734		0.945858							1	-7.85377e-05	-2.8431e-05	15.0334	3.3595	5.26643	0	5.6072	0	0.945786	0	0	0	0	0
Lab 3	Jul 30, 2020	5	21	iRM5	9.5859e-05	-2.61727e-06	0.000107134	4.56211e-05	6.98415e-05		0.000145886		7.22353e-05						7.41999e-06	2.43774e-05	14.9044	3.33066	5.22127		5.55921		0.93772							1	-8.8439e-05	2.69947e-05	14.9043	3.33061	5.2212	0	5.55906	0	0.937648	0	0	0	0	0
Lab 3	Jul 30, 2020	5	22	STD	9.5859e-05	-2.61727e-06	0.000107134	4.56211e-05	6.98415e-05		0.000145886		7.22353e-05						2.45466e-05	-8.20762e-06	15.0076	3.35372	5.25754		5.59786		0.944254							1	-7.13124e-05	-5.59035e-06	15.0075	3.35367	5.25747	0	5.59771	0	0.944182	0	0	0	0	0
Lab 3	Jul 30, 2020	5	23	iRM10	9.5859e-05	-2.61727e-06	0.000107134	4.56211e-05	6.98415e-05		0.000145886		7.22353e-05						1.62768e-05	4.61347e-06	15.1501	3.3856	5.30747		5.65102		0.953255							1	-7.95821e-05	7.23074e-06	15.15	3.38556	5.3074	0	5.65087	0	0.953183	0	0	0	0	0
Lab 3	Jul 30, 2020	5	24	STD	9.5859e-05	-2.61727e-06	0.000107134	4.56211e-05	6.98415e-05		0.000145886		7.22353e-05						-2.74892e-06	1.23603e-05	14.8523	3.31905	5.20316		5.54005		0.934503							1	-9.86079e-05	1.49775e-05	14.8522	3.31901	5.20309	0	5.5399	0	0.93443	0	0	0	0	0
Lab 3	Jul 30, 2020	5	25	iRM10#2	9.5859e-05	-2.61727e-06	0.000107134	4.56211e-05	6.98415e-05		0.000145886		7.22353e-05						8.94744e-05	1.56134e-05	14.9663	3.34454	5.24323		5.58269		0.941719							1	-6.38456e-06	1.82307e-05	14.9662	3.34449	5.24316	0	5.58254	0	0.941647	0	0	0	0	0
Lab 3	Jul 30, 2020	5	26	STD	9.5859e-05	-2.61727e-06	0.000107134	4.56211e-05	6.98415e-05		0.000145886		7.22353e-05						3.16431e-05	1.10249e-05	14.6421	3.27215	5.12958		5.46178		0.92132							1	-6.42159e-05	1.36422e-05	14.642	3.27211	5.12951	0	5.46163	0	0.921248	0	0	0	0	0
Lab 3	Jul 30, 2020	5	27	iRM4	9.5859e-05	-2.61727e-06	0.000107134	4.56211e-05	6.98415e-05		0.000145886		7.22353e-05						3.0736e-05	2.37134e-05	14.9188	3.33398	5.22662		5.56509		0.938788							1	-6.51229e-05	2.63307e-05	14.9187	3.33393	5.22655	0	5.56495	0	0.938716	0	0	0	0	0
Lab 3	Jul 30, 2020	5	28	STD	9.5859e-05	-2.61727e-06	0.000107134	4.56211e-05	6.98415e-05		0.000145886		7.22353e-05						2.88103e-05	-1.04024e-05	14.7753	3.30189	5.17631		5.51154		0.929749							1	-6.70487e-05	-7.78518e-06	14.7752	3.30185	5.17624	0	5.5114	0	0.929677	0	0	0	0	0
Lab 3	Jul 30, 2020	5	29	iRM5	9.5859e-05	-2.61727e-06	0.000107134	4.56211e-05	6.98415e-05		0.000145886		7.22353e-05						1.33088e-05	2.80468e-05	14.6295	3.26934	5.12531		5.45729		0.920588							1	-8.25502e-05	3.06641e-05	14.6294	3.26929	5.12524	0	5.45714	0	0.920516	0	0	0	0	0
Lab 3	Jul 30, 2020	5	30	STD	9.5859e-05	-2.61727e-06	0.000107134	4.56211e-05	6.98415e-05		0.000145886		7.22353e-05						-5.60504e-07	4.5361e-06	14.7845	3.30397	5.17967		5.51519		0.930379							1	-9.64195e-05	7.15337e-06	14.7844	3.30392	5.1796	0	5.51505	0	0.930307	0	0	0	0	0
Lab 3	Jul 30, 2020	5	31	iRM10	9.5859e-05	-2.61727e-06	0.000107134	4.56211e-05	6.98415e-05		0.000145886		7.22353e-05						2.83067e-05	5.24964e-05	14.9432	3.3394	5.23526		5.57444		0.940379							1	-6.75523e-05	5.51136e-05	14.9431	3.33935	5.23519	0	5.5743	0	0.940307	0	0	0	0	0
Lab 3	Jul 30, 2020	5	32	STD	9.5859e-05	-2.61727e-06	0.000107134	4.56211e-05	6.98415e-05		0.000145886		7.22353e-05						2.80565e-05	-1.40977e-05	14.6545	3.27493	5.13417		5.46684		0.922238							1	-6.78025e-05	-1.14804e-05	14.6544	3.27489	5.1341	0	5.46669	0	0.922166	0	0	0	0	0
Lab 3	Jul 30, 2020	5	33	iRM10#2	9.5859e-05	-2.61727e-06	0.000107134	4.56211e-05	6.98415e-05		0.000145886		7.22353e-05						5.8268e-05	-7.18356e-06	14.7694	3.30063	5.17446		5.50973		0.929449							1	-3.7591e-05	-4.56629e-06	14.7693	3.30059	5.17439	0	5.50958	0	0.929377	0	0	0	0	0
Lab 3	Jul 30, 2020	5	34	STD	9.5859e-05	-2.61727e-06	0.000107134	4.56211e-05	6.98415e-05		0.000145886		7.22353e-05						4.45868e-05	1.67782e-05	14.4875	3.23764	5.07571		5.40462		0.911743							1	-5.12722e-05	1.93954e-05	14.4874	3.2376	5.07564	0	5.40447	0	0.911671	0	0	0	0	0
Lab 3	Jul 30, 2020	5	35	iRM4	9.5859e-05	-2.61727e-06	0.000107134	4.56211e-05	6.98415e-05		0.000145886		7.22353e-05						1.68571e-05	1.92943e-05	14.6004	3.26289	5.11533		5.4469		0.918888							1	-7.90019e-05	2.19116e-05	14.6003	3.26285	5.11526	0	5.44675	0	0.918816	0	0	0	0	0
Lab 3	Jul 30, 2020	5	36	STD	9.5859e-05	-2.61727e-06	0.000107134	4.56211e-05	6.98415e-05		0.000145886		7.22353e-05						7.09642e-05	3.97913e-05	14.5979	3.26233	5.11448		5.44607		0.918757							1	-2.48948e-05	4.24086e-05	14.5978	3.26229	5.11441	0	5.44593	0	0.918684	0	0	0	0	0
Lab 3	Jul 30, 2020	5	37	iRM5	9.5859e-05	-2.61727e-06	0.000107134	4.56211e-05	6.98415e-05		0.000145886		7.22353e-05						-1.52867e-05	8.12803e-06	14.4779	3.23553	5.07242		5.40131		0.911214							1	-0.000111146	1.07453e-05	14.4778	3.23548	5.07235	0	5.40117	0	0.911142	0	0	0	0	0
Lab 3	Jul 30, 2020	5	38	STD	9.5859e-05	-2.61727e-06	0.000107134	4.56211e-05	6.98415e-05		0.000145886		7.22353e-05						4.62672e-06	9.4822e-06	14.3835	3.21447	5.03943		5.36619		0.905255							1	-9.12323e-05	1.20995e-05	14.3834	3.21442	5.03936	0	5.36604	0	0.905182	0	0	0	0	0
Lab 3	Jul 30, 2020	5	39	iRM10	9.5859e-05	-2.61727e-06	0.000107134	4.56211e-05	6.98415e-05		0.000145886		7.22353e-05						2.61126e-05	3.42981e-05	14.7275	3.29134	5.16002		5.49464		0.92692							1	-6.97463e-05	3.69154e-05	14.7274	3.2913	5.15995	0	5.4945	0	0.926848	0	0	0	0	0
Lab 3	Jul 30, 2020	5	40	STD	9.5859e-05	-2.61727e-06	0.000107134	4.56211e-05	6.98415e-05		0.000145886		7.22353e-05						2.00841e-05	7.8007e-06	14.4427	3.22767	5.06022		5.3884		0.909016							1	-7.57749e-05	1.0418e-05	14.4426	3.22763	5.06015	0	5.38826	0	0.908944	0	0	0	0	0
[truncated: 106 more columns]
